# Supplementary material for: Genomic landscape of liposarcoma
Source: PubMed Central journal article supplement (PMC4767443; doi:10.18632/oncotarget.6464), 2015-12-04
Supplement: oncotarget-06-42429-s001.pdf [file oncotarget-06-42429-s001.pdf]

## Genomic landscape of liposarcoma

### Supplementary Material

**Supplementary Figure S1.** Profiling of *CPM* expression in LPS patient samples and LPS cell lines.

**Supplementary Figure S2.** Role of *CPM* in LPS.

**Supplementary Figure S3.** Mean coverage of WES in 12 LPS patient tumor samples with the matching control normal samples in Discovery cohort at  $\geq 20X$ .

**Supplementary Figure S4.** Mutation frequencies and significantly mutated genes in Prevalence Cohort.

**Supplementary Figure S5.** Alterations of frequently mutated genes *NF1* and *BRAF*

**Supplementary Table S1:** Patient sample's clinical details and analyses performed.

**Supplementary Table S2:** Regions of significant amplifications and deletions identified using GISTIC analysis in LPS patient samples.

**Supplementary Table S3:** Regions of significant amplifications and deletions identified using GISTIC analysis in LPS cell lines.

**Supplementary Table S4:** Coverage analysis of whole exome sequencing of 12 LPSs and matched adjacent normal tissues in Discovery Cohort.

**Supplementary Table S5:** Summary of somatic mutations in the Discovery Cohort.

**Supplementary Table S6:** List of genes for targeted capture in Prevalence cohort study.

**Supplementary Table S7:** Coverage analysis of targeted exome sequencing of 90 LPSs in Prevalence cohort.

**Supplementary Table S8:** Summary of mutations in the LPS Prevalence Cohort and LPS cell lines.

**Supplementary Table S9:** List of significantly mutated genes identified by MuSiC analysis.

**Supplementary Table S10:** KEGG pathway analysis.

**Supplementary Table S11:** List of primer sequences.

**Supplementary Table S12:** List of antibodies used in the study.

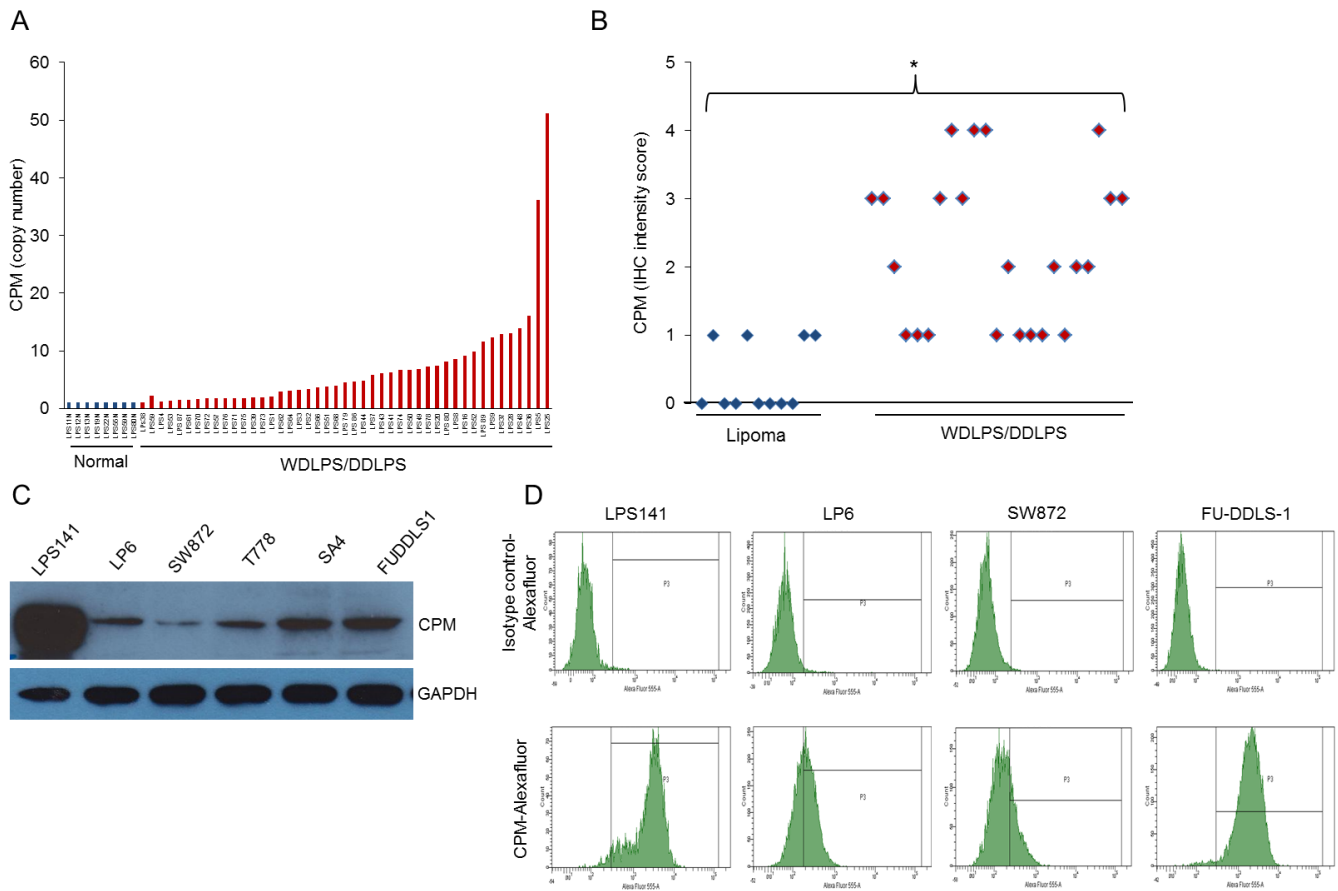

**Supplementary Figure S1: Profiling of *CPM* expression in LPS patient samples and LPS cell lines.** **A.** Copy number of *CPM* gene in LPS patient samples determined by genomic quantitative PCR. Copy number change compared with the normal control samples shown in WDLPS/DDLPS cases. **B.** Distribution of *CPM* IHC staining scores in lipoma and LPS tissues. *CPM* is expressed higher in LPS tissues than in benign lipoma. **C.** Western blotting analysis of *CPM* protein expression in LPS cell lines [GAPDH, internal loading control]. **D.** Flow cytometric analysis of *CPM* surface expression in LPS cell lines.

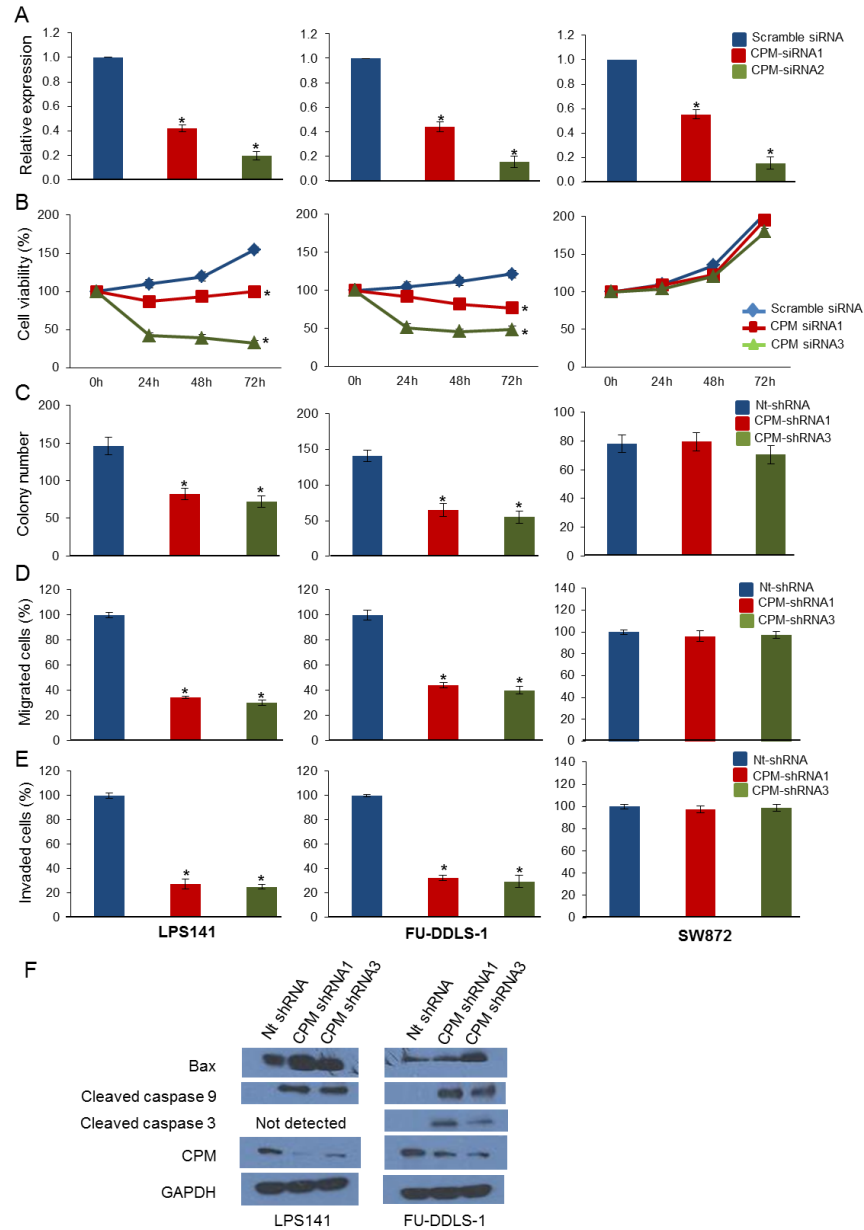

**Supplementary Figure S2: Role of CPM in LPS.** **A.** Quantitative real time PCR analysis: *CPM* expression levels in LPS141, FU-DDLS-1 and SW872 cells with *CPM* knockdown using siRNA1 and siRNA2 relative to scramble siRNA. **B.** Cell viability MTT assay: Effect of *CPM* siRNA on cell viability at 24 h, 48 h and 72 h, relative to scramble siRNA. Cells were transiently transfected with *CPM* siRNA1 and siRNA2 vs. control scramble siRNA, seeded in 96-well plates ( $5 \times 10^3$  per well) and grown for 3 days followed by MTT assay. **C.** Soft agar colony assay: Effect on clonogenic property of stable *CPM* knockdown cells using shRNA1 and shRNA3 compared to control Nt-shRNA transduced cells. **(D)** Migration assay: Number of migrated cells measured using Transwell assay of *CPM* shRNA and Nt-shRNA infected LPS cells. *CPM* knockdown significantly decreases the migration ability of LPS141 and FU-DDLS-1 cells. **E.** Invasion assay: Quantification of the numbers of *CPM* shRNA and

Nt-shRNA LPS cells migrating through Matrigel in Transwell invasion assay. **F.** Western blot analysis for the expression of apoptosis associated proteins in CPM knockdown LPS141 and FU-DDLS-1 cells. Data represents mean  $\pm$  S.E.; n = 3. \*P < 0.05 [Note: Value of S.E. are too small to be visible in the panel **B**]

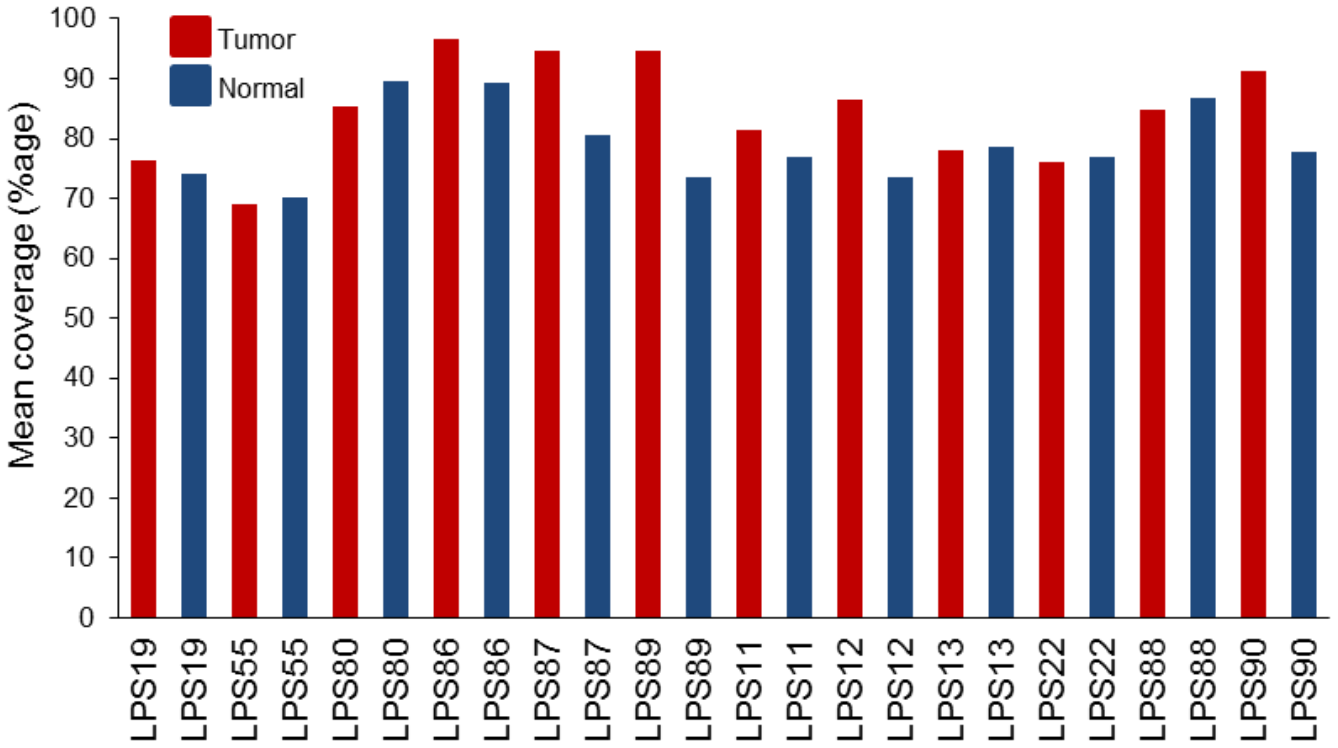

**Supplementary Figure S3:** Mean coverage of WES in 12 LPS patient tumor samples with the matching normal control samples in Discovery cohort at  $\geq 20X$ . Coverage of the coding regions is plotted for each pair of LPS patient sample.

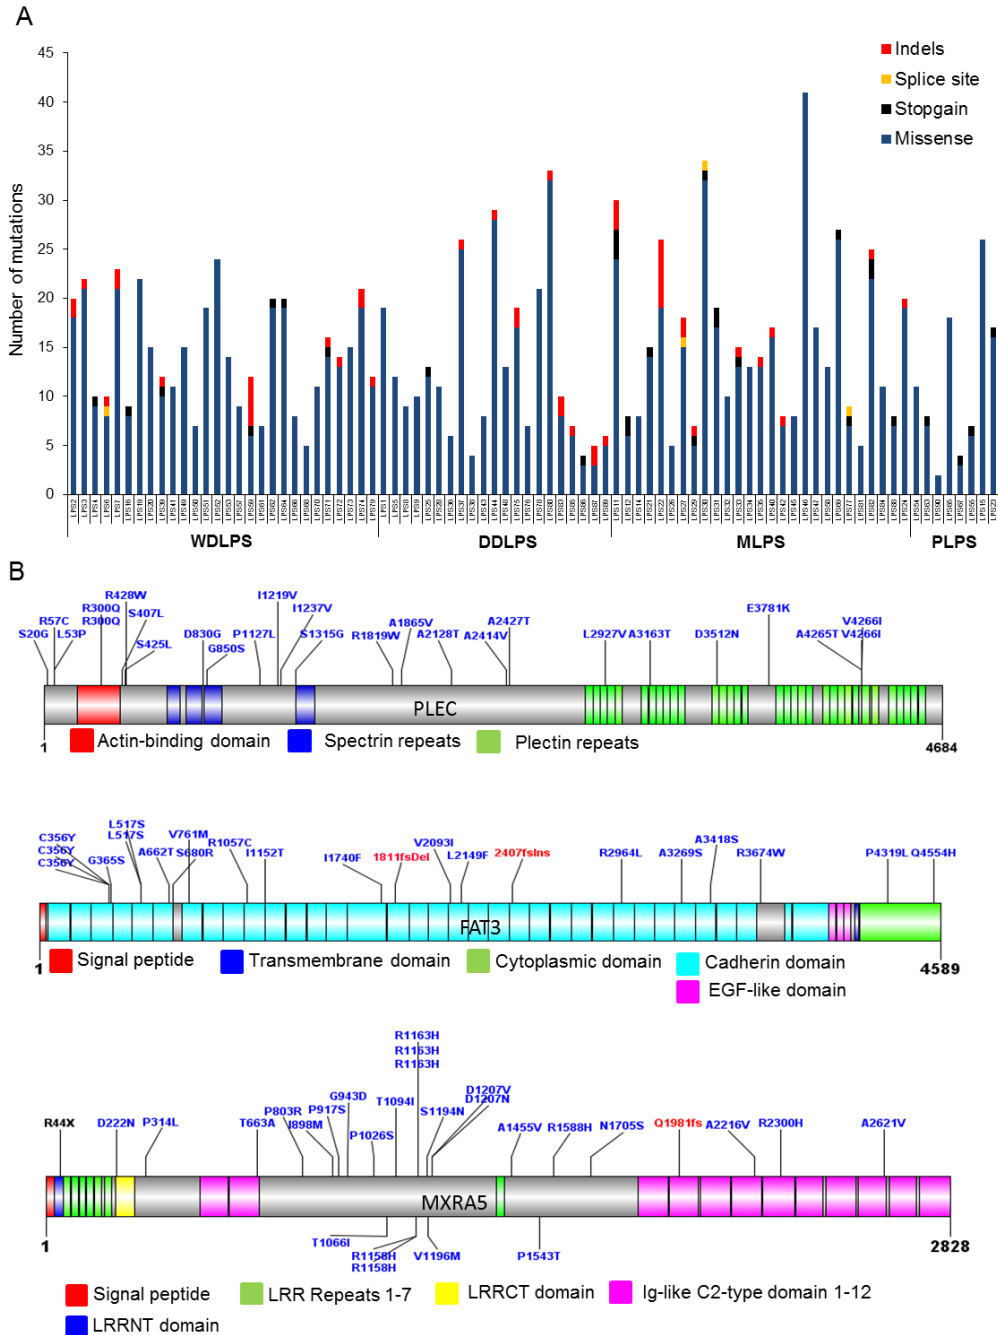

**Supplementary Figure S4: Mutation frequencies and significantly mutated genes in Prevalence Cohort.** **A.** Number and distribution of mutations identified in each patient sample of the Prevalence cohort. **B.** Distribution of validated mutations found in significantly mutated recurrent genes; *PLEC*, a cytoskeletal-linker protein which plays an important role in maintaining the integrity of tissue structure found to be most highly recurrently mutated gene in 27% of LPS patients; *FAT3*, a member of FAT family, cadherins involved in tumor suppression and planar cell polarity and is the second most frequently (24%) mutated. *MXRA5*, a matrix-remodeling associated protein involved in ECM remodeling and cell-cell adhesion was mutated in 27% of patients.

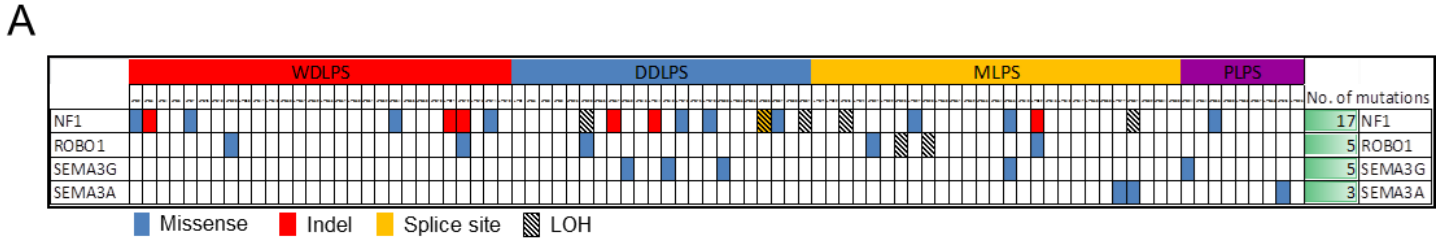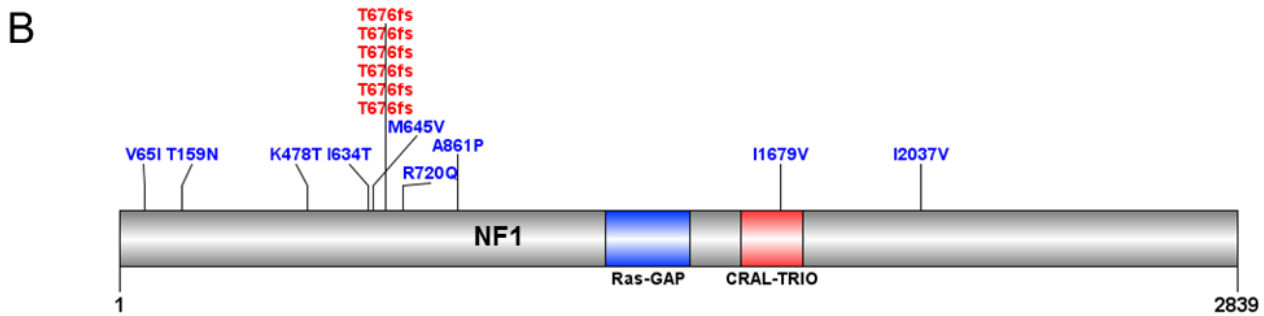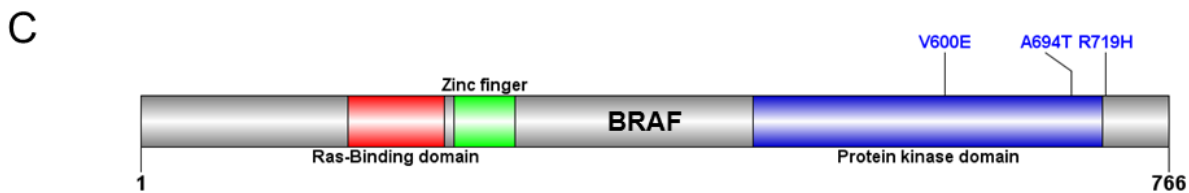

**Supplementary Figure S5. Alterations of frequently mutated genes *NF1* and *BRAF*.** **A.** Number and type of alterations in class of genes with regulatory role in axon guidance and cancer cell growth in LPS Prevalence cohort. **B.** Distribution of validated mutations along the length of *NF1* gene. **C.** Distribution of validated mutations found in the *BRAF* gene in patient samples and cell lines.

**Supplementary Table S1: Patient sample's clinical details and analyses performed**

| Sample ID | Race<br>W: Caucasian<br>B: African<br>A: Asian | Gender<br>M: Male<br>F: Female | Age | LPS<br>DD: de-differentiated LPS<br>WD: well-differentiated LPS<br>M: myxoid LPS<br>P: Pleomorphic LPS | Site                  | Survival  |              | SNP Chips<br>tumor  | Whole<br>Exome<br>Sequencing | Targeted-Exome<br>Sequencing |
|-----------|------------------------------------------------|--------------------------------|-----|--------------------------------------------------------------------------------------------------------|-----------------------|-----------|--------------|---------------------|------------------------------|------------------------------|
|           |                                                |                                |     |                                                                                                        |                       | Follow-up | Vital Status |                     |                              |                              |
| LPS11     | W                                              | F                              | 80  | M                                                                                                      | NA                    | 128       | alive        | Affymetrix 250K Nsp | SureSelect 50M               | SureSelect customized beads  |
| LPS12     | W                                              | F                              | 50  | M                                                                                                      | NA                    | 125       | dead         | Affymetrix 250K Nsp | SureSelect 50M               | SureSelect customized beads  |
| LPS13     | W                                              | F                              | 52  | M                                                                                                      | NA                    | 93        | alive        | Affymetrix 250K Nsp | SureSelect 50M               | X                            |
| LPS19     | W                                              | F                              | 84  | WD                                                                                                     | NA                    | 64        | dead         | Affymetrix 250K Nsp | SureSelect 50M               | SureSelect customized beads  |
| LPS22     | W                                              | M                              | 48  | M                                                                                                      | NA                    | 51        | dead         | Affymetrix 250K Nsp | SureSelect 50M               | SureSelect customized beads  |
| LPS55     | A                                              | F                              | 54  | WD                                                                                                     | Soft tissue           | 73        | dead         | Affymetrix 250K Nsp | SureSelect 50M               | SureSelect customized beads  |
| LPS80     | W                                              | F                              | 56  | DD                                                                                                     | Retroperitoneal space | NA        | Dead         | Affymetrix 250K Nsp | SureSelect 50M               | SureSelect customized beads  |
| LPS86     | W                                              | F                              | 53  | DD                                                                                                     | NA                    | NA        | NA           | Affymetrix CytoScan | SureSelect 50M               | SureSelect customized beads  |
| LPS87     | W                                              | M                              | 51  | DD                                                                                                     | NA                    | NA        | NA           | Affymetrix CytoScan | SureSelect 50M               | SureSelect customized beads  |
| LPS88     | W                                              | F                              | 60  | M                                                                                                      | NA                    | NA        | NA           | Affymetrix CytoScan | SureSelect 50M               | SureSelect customized beads  |
| LPS89     | W                                              | F                              | 67  | DD                                                                                                     | NA                    | NA        | NA           | Affymetrix CytoScan | SureSelect 50M               | SureSelect customized beads  |
| LPS90     | W                                              | M                              | 55  | P                                                                                                      | NA                    | NA        | NA           | Affymetrix CytoScan | SureSelect 50M               | SureSelect customized beads  |
| LPS1      | NA                                             | M                              | 75  | DD                                                                                                     | NA                    | NA        | NA           | Affymetrix 250K Nsp | X                            | SureSelect customized beads  |
| LPS2      | NA                                             | M                              | 72  | WD                                                                                                     | NA                    | NA        | NA           | Affymetrix 250K Nsp | X                            | SureSelect customized beads  |
| LPS3      | NA                                             | NA                             | NA  | WD                                                                                                     | NA                    | NA        | NA           | Affymetrix 250K Nsp | X                            | SureSelect customized beads  |
| LPS4      | NA                                             | F                              | 53  | WD                                                                                                     | NA                    | NA        | NA           | Affymetrix 250K Nsp | X                            | SureSelect customized beads  |
| LPS5      | NA                                             | F                              | 67  | DD                                                                                                     | NA                    | NA        | NA           | Affymetrix 250K Nsp | X                            | SureSelect customized beads  |
| LPS6      | NA                                             | NA                             | NA  | WD                                                                                                     | NA                    | NA        | NA           | Affymetrix 250K Nsp | X                            | SureSelect customized beads  |
| LPS7      | NA                                             | NA                             | NA  | WD                                                                                                     | NA                    | NA        | NA           | Affymetrix 250K Nsp | X                            | SureSelect customized beads  |
| LPS8      | NA                                             | M                              | 43  | DD                                                                                                     | NA                    | NA        | NA           | Affymetrix 250K Nsp | X                            | SureSelect customized beads  |
| LPS9      | NA                                             | NA                             | NA  | DD                                                                                                     | NA                    | NA        | NA           | Affymetrix 250K Nsp | X                            | SureSelect customized beads  |
| LPS14     | W                                              | M                              | 35  | M                                                                                                      | NA                    | 125       | alive        | Affymetrix 250K Nsp | X                            | SureSelect customized beads  |
| LPS15     | W                                              | M                              | 68  | NOS                                                                                                    | NA                    | 15        | alive        | Affymetrix 250K Nsp | X                            | SureSelect customized beads  |
| LPS16     | W                                              | M                              | 75  | WD                                                                                                     | NA                    | 21        | alive        | Affymetrix 250K Nsp | X                            | SureSelect customized beads  |
| LPS20     | W                                              | F                              | 78  | WD                                                                                                     | NA                    | 69        | alive        | Affymetrix 250K Nsp | X                            | SureSelect customized beads  |
| LPS21     | W                                              | F                              | 47  | M                                                                                                      | NA                    | 100       | dead         | Affymetrix 250K Nsp | X                            | SureSelect customized beads  |
| LPS23     | W                                              | M                              | 71  | NOS                                                                                                    | NA                    | 63        | dead         | Affymetrix 250K Nsp | X                            | SureSelect customized beads  |
| LPS24     | W                                              | M                              | 76  | P                                                                                                      | NA                    | 19        | dead         | Affymetrix 250K Nsp | X                            | SureSelect customized beads  |
| LPS25     | W                                              | M                              | 72  | DD                                                                                                     | Thigh                 | 41        | dead         | Affymetrix 250K Nsp | X                            | SureSelect customized beads  |
| LPS26     | W                                              | M                              | 47  | M                                                                                                      | Soft tissue           | 76        | dead         | Affymetrix 250K Nsp | X                            | SureSelect customized beads  |
| LPS27     | W                                              | F                              | 32  | M                                                                                                      | Retroperitoneum       | 13        | dead         | Affymetrix 250K Nsp | X                            | SureSelect customized beads  |
| LPS28     | W                                              | F                              | 33  | DD                                                                                                     | Pelvis                | 1         | dead         | Affymetrix 250K Nsp | X                            | SureSelect customized beads  |
| LPS29     | W                                              | F                              | 14  | M                                                                                                      | Thigh                 | 135       | alive        | Affymetrix 250K Nsp | X                            | SureSelect customized beads  |
| LPS30     | W                                              | F                              | 46  | M                                                                                                      | Pelvis                | 36        | dead         | Affymetrix 250K Nsp | X                            | SureSelect customized beads  |
| LPS31     | A                                              | F                              | 45  | M                                                                                                      | Thigh                 | 10        | dead         | Affymetrix 250K Nsp | X                            | SureSelect customized beads  |
| LPS32     | W                                              | M                              | 74  | M                                                                                                      | Thigh                 | 125       | alive        | Affymetrix 250K Nsp | X                            | SureSelect customized beads  |
| LPS33     | W                                              | M                              | 57  | M                                                                                                      | Soft tissue           | 64        | dead         | Affymetrix 250K Nsp | X                            | SureSelect customized beads  |
| LPS34     | W                                              | M                              | 66  | M                                                                                                      | Retroperitoneum       | 42        | dead         | Affymetrix 250K Nsp | X                            | SureSelect customized beads  |
| LPS35     | W                                              | F                              | 50  | M                                                                                                      | Thigh                 | 60        | alive        | Affymetrix 250K Nsp | X                            | SureSelect customized beads  |
| LPS36     | W                                              | M                              | 83  | DD                                                                                                     | Testicle              | 64        | dead         | Affymetrix 250K Nsp | X                            | SureSelect customized beads  |
| LPS37     | W                                              | M                              | 57  | DD                                                                                                     | Retroperitoneum       | 71        | alive        | Affymetrix 250K Nsp | X                            | SureSelect customized beads  |
| LPS38     | W                                              | M                              | 70  | DD                                                                                                     | Retroperitoneum       | 9         | dead         | Affymetrix 250K Nsp | X                            | SureSelect customized beads  |
| LPS39     | W                                              | F                              | 57  | WD                                                                                                     | Retroperitoneum       | NA        | alive        | Affymetrix 250K Nsp | X                            | SureSelect customized beads  |
| LPS40     | W                                              | M                              | 46  | M                                                                                                      | Soft tissue           | 1         | alive        | Affymetrix 250K Nsp | X                            | SureSelect customized beads  |
| LPS41     | W                                              | F                              | 52  | WD                                                                                                     | Thigh                 | 34        | alive        | Affymetrix 250K Nsp | X                            | SureSelect customized beads  |
| LPS42     | W                                              | M                              | 85  | M                                                                                                      | Groin                 | 31        | alive        | Affymetrix 250K Nsp | X                            | SureSelect customized beads  |
| LPS43     | W                                              | F                              | 49  | DD                                                                                                     | Pelvis                | 1         | alive        | Affymetrix 250K Nsp | X                            | SureSelect customized beads  |
| LPS44     | W                                              | M                              | 68  | DD                                                                                                     | Shoulder              | 19        | alive        | Affymetrix 250K Nsp | X                            | SureSelect customized beads  |
| LPS45     | W                                              | F                              | 69  | M                                                                                                      | Thigh                 | 30        | alive        | Affymetrix 250K Nsp | X                            | SureSelect customized beads  |
| LPS46     | B                                              | M                              | 36  | M                                                                                                      | Foot                  | 2         | alive        | Affymetrix 250K Nsp | X                            | SureSelect customized beads  |
| LPS47     | A                                              | F                              | 69  | M                                                                                                      | Pelvis                | 1         | alive        | Affymetrix 250K Nsp | X                            | SureSelect customized beads  |
| LPS48     | W                                              | M                              | 51  | DD                                                                                                     | Retroperitoneum       | 17        | alive        | Affymetrix 250K Nsp | X                            | SureSelect customized beads  |
| LPS49     | W                                              | M                              | 55  | WD                                                                                                     | Shoulder              | 1         | alive        | Affymetrix 250K Nsp | X                            | SureSelect customized beads  |
| LPS50     | W                                              | M                              | 74  | WD                                                                                                     | Thigh                 | 1         | alive        | Affymetrix 250K Nsp | X                            | SureSelect customized beads  |
| LPS51     | W                                              | F                              | 60  | WD                                                                                                     | Retroperitoneum       | 4         | alive        | Affymetrix 250K Nsp | X                            | SureSelect customized beads  |
| LPS52     | W                                              | M                              | 55  | WD                                                                                                     | Leg                   | 1         | alive        | Affymetrix 250K Nsp | X                            | SureSelect customized beads  |
| LPS53     | A                                              | M                              | 47  | WD                                                                                                     | Soft tissue           | 1         | alive        | Affymetrix 250K Nsp | X                            | SureSelect customized beads  |
| LPS54     | A                                              | F                              | 50  | P                                                                                                      | Soft tissue           | 62        | dead         | Affymetrix 250K Nsp | X                            | SureSelect customized beads  |



|           |   |    |    |     |                       |     |       |                     |                |                             |
|-----------|---|----|----|-----|-----------------------|-----|-------|---------------------|----------------|-----------------------------|
| LPS57     | A | M  | 57 | WD  | Pelvis                | 119 | alive | Affymetrix 250K Nsp | X              | SureSelect customized beads |
| LPS58     | A | F  | 33 | M   | Thigh                 | 61  | alive | Affymetrix 250K Nsp | X              | SureSelect customized beads |
| LPS59     | A | F  | 45 | WD  | Thigh                 | 51  | alive | Affymetrix 250K Nsp | X              | SureSelect customized beads |
| LPS61     | A | M  | 63 | WD  | Thigh                 | 42  | alive | Affymetrix 250K Nsp | X              | SureSelect customized beads |
| LPS62     | A | F  | 29 | WD  | Shoulder              | 47  | alive | Affymetrix 250K Nsp | X              | SureSelect customized beads |
| LPS63     | A | F  | 62 | P   | Peritoneum            | 2   | alive | Affymetrix 250K Nsp | X              | SureSelect customized beads |
| LPS64     | A | M  | 76 | WD  | Thigh                 | 36  | alive | Affymetrix 250K Nsp | X              | SureSelect customized beads |
| LPS65     | A | M  | 61 | Mxd | Retroperitoneum       | 38  | alive | Affymetrix 250K Nsp | X              | SureSelect customized beads |
| LPS66     | A | F  | 72 | WD  | Thigh                 | 30  | alive | Affymetrix 250K Nsp | X              | SureSelect customized beads |
| LPS67     | A | M  | 45 | Mxd | Thigh                 | 35  | alive | Affymetrix 250K Nsp | X              | SureSelect customized beads |
| LPS68     | A | M  | 41 | WD  | Thigh                 | 27  | alive | Affymetrix 250K Nsp | X              | SureSelect customized beads |
| LPS69     | A | M  | 57 | M   | Retroperitoneum       | 46  | alive | Affymetrix 250K Nsp | X              | SureSelect customized beads |
| LPS70     | A | M  | 86 | WD  | Retroperitoneum       | 14  | alive | Affymetrix 250K Nsp | X              | SureSelect customized beads |
| LPS71     | A | F  | 41 | WD  | Thigh                 | 19  | alive | Affymetrix 250K Nsp | X              | SureSelect customized beads |
| LPS72     | A | F  | 73 | WD  | Retroperitoneum       | 21  | alive | Affymetrix 250K Nsp | X              | SureSelect customized beads |
| LPS73     | A | M  | 63 | WD  | Thigh                 | 0   | alive | Affymetrix 250K Nsp | X              | SureSelect customized beads |
| LPS74     | A | M  | 57 | WD  | Retroperitoneum       | 119 | alive | Affymetrix 250K Nsp | X              | SureSelect customized beads |
| LPS75     | A | M  | 52 | DD  | Retroperitoneum       | 4   | alive | Affymetrix 250K Nsp | X              | SureSelect customized beads |
| LPS76     | W | NA | NA | DD  | NA                    | NA  | NA    | Not Done            | X              | SureSelect customized beads |
| LPS77     | W | NA | NA | M   | NA                    | NA  | NA    | Affymetrix 250K Nsp | X              | SureSelect customized beads |
| LPS78     | W | NA | NA | DD  | NA                    | NA  | NA    | Affymetrix 250K Nsp | X              | SureSelect customized beads |
| LPS79     | W | NA | NA | WD  | NA                    | NA  | NA    | Affymetrix 250K Nsp | X              | SureSelect customized beads |
| LPS81     | A | M  | 63 | M   | Retroperitoneal space | NA  | NA    | Affymetrix 250K Nsp | X              | SureSelect customized beads |
| LPS82     | A | M  | 29 | M   | Right thigh           | NA  | NA    | Affymetrix 250K Nsp | X              | SureSelect customized beads |
| LPS83     | W | NA | NA | DD  | NA                    | NA  | NA    | Affymetrix 250K Nsp | X              | SureSelect customized beads |
| LPS84     | W | NA | NA | M   | NA                    | NA  | NA    | Affymetrix 250K Nsp | X              | SureSelect customized beads |
| LPS85     | W | NA | NA | DD  | NA                    | NA  | NA    | Affymetrix 250K Nsp | X              | SureSelect customized beads |
| LPS91-T1  | W | NA | NA | DD  | NA                    | NA  | NA    | Affymetrix CytoScan | SureSelect 50M | SureSelect customized beads |
| LPS91-T2  | W | NA | NA | DD  | NA                    | NA  | NA    | Affymetrix CytoScan | SureSelect 50M | SureSelect customized beads |
| LPS91-T3  | W | NA | NA | DD  | NA                    | NA  | NA    | Affymetrix CytoScan | SureSelect 50M | SureSelect customized beads |
| FU-DDLS-1 |   | M  |    | DD  |                       |     |       | Affymetrix CytoScan | X              | SureSelect customized beads |
| GOT-3     |   | F  |    | M   |                       |     |       | Affymetrix CytoScan | X              | SureSelect customized beads |
| LiSa-2    |   | M  |    | P   |                       |     |       | Affymetrix CytoScan | X              | SureSelect customized beads |
| LPS141    |   | M  |    | DD  |                       |     |       | Affymetrix CytoScan | X              | SureSelect customized beads |
| LP1       |   | M  |    | DD  |                       |     |       | Affymetrix CytoScan | X              | SureSelect customized beads |
| LP2       |   | F  |    | DD  |                       |     |       | Affymetrix CytoScan | X              | SureSelect customized beads |
| LP3       |   | M  |    | DD  |                       |     |       | Affymetrix CytoScan | X              | SureSelect customized beads |
| LP6       |   | M  |    | DD  |                       |     |       | Affymetrix CytoScan | X              | SureSelect customized beads |
| SA4       |   | M  |    | DD  |                       |     |       | Affymetrix CytoScan | X              | SureSelect customized beads |
| MLS402    |   | M  |    | M   |                       |     |       | Affymetrix CytoScan | X              | SureSelect customized beads |
| T1000     |   | M  |    | WD  |                       |     |       | Affymetrix CytoScan | X              | SureSelect customized beads |
| T778      |   | F  |    | WD  |                       |     |       | Affymetrix CytoScan | X              | SureSelect customized beads |
| SW872     |   | M  |    | WD  |                       |     |       | Affymetrix CytoScan | X              | SureSelect customized beads |

**Supplementary Table S2: Regions of significant amplifications and deletions identified in LPS patients using GISTIC analysis**

**Amplifications**

| Cytoband | q value  | Residual q value | Wide peak boundaries    | Genes in wide peak                                                                                          |
|----------|----------|------------------|-------------------------|-------------------------------------------------------------------------------------------------------------|
| 12q14.2  | 4.99E-76 | 5.89E-61         | chr12:64498285-64542661 | SRGAP1                                                                                                      |
| 12q13.2  | 7.90E-63 | 7.57E-49         | chr12:56306404-56586248 | CDK2, DGKA, ERBB3, MYL6, PA2G4, RAB5B, RPL41, RPS26, PMEL, SMARCC2, SUOX, ESYT1, IKZF4, WIBG, ZC3H10, MYL6B |
| 12q14.3  | 3.84E-97 | 7.14E-47         | chr12:67443968-67499750 | [CAND1]                                                                                                     |
| 12q15    | 1.02E-93 | 2.12E-36         | chr12:68215288-68328705 | [DYRK2]                                                                                                     |
| 12q14.3  | 2.25E-41 | 3.52E-27         | chr12:66195618-66243501 | HMG2, RPSAP52                                                                                               |
| 12q21.33 | 6.81E-32 | 2.12E-21         | chr12:90113349-90171437 | [LOC338758]                                                                                                 |
| 12q22    | 1.17E-27 | 6.73E-21         | chr12:95119817-95206921 | [MIR492]                                                                                                    |
| 12q14.1  | 3.63E-31 | 3.35E-19         | chr12:58129741-58203033 | CDK4, CYP27B1, METTL1, TSPAN31, TSFM, AVIL, METTL21B, AGAP2                                                 |
| 12q14.3  | 3.40E-33 | 7.70E-18         | chr12:67042639-67165808 | GRIP1                                                                                                       |
| 12q15    | 4.70E-58 | 1.38E-16         | chr12:69987495-70082408 | CCT2, BEST3, LRRC10                                                                                         |
| 12q21.31 | 4.34E-35 | 1.03E-15         | chr12:81704065-81810830 | PPFIA2                                                                                                      |
| 12q21.2  | 4.85E-27 | 2.20E-15         | chr12:75954692-76007828 | [KRR1]                                                                                                      |
| 12q21.33 | 5.53E-22 | 4.79E-15         | chr12:91069106-91155406 | [C12orf37]                                                                                                  |
| 12q14.1  | 1.88E-17 | 7.51E-14         | chr12:60536258-60620625 | [SLC16A7]                                                                                                   |
| 12q21.31 | 3.04E-26 | 1.07E-13         | chr12:82249068-82330394 | [PPFIA2]                                                                                                    |
| 12q15    | 3.83E-59 | 1.11E-13         | chr12:68771885-68847873 | [MDM1]                                                                                                      |
| 12q21.1  | 2.54E-24 | 1.20E-13         | chr12:74331424-74351098 | [LOC100507377]                                                                                              |
| 12q21.1  | 2.54E-30 | 1.63E-13         | chr12:72263831-72298334 | TBC1D15                                                                                                     |
| 12q15    | 1.96E-60 | 3.24E-13         | chr12:69745544-69815757 | LYZ, YEATS4                                                                                                 |
| 12q21.31 | 4.17E-29 | 1.89E-12         | chr12:81298480-81456745 | hsa-mir-618, LIN7A, MIR618                                                                                  |
| 12q14.2  | 3.00E-27 | 4.44E-12         | chr12:64291912-64346945 | SRGAP1                                                                                                      |
| 12q21.1  | 3.42E-26 | 1.63E-11         | chr12:73671021-73737493 | [TRHDE]                                                                                                     |
| 12q21.31 | 4.00E-22 | 2.26E-11         | chr12:83698399-83717706 | [TMTC2]                                                                                                     |
| 12q15    | 1.31E-52 | 3.09E-11         | chr12:69459348-69486990 | [CPM]                                                                                                       |
| 12q14.1  | 5.43E-23 | 5.93E-11         | chr12:58817775-58843458 | [LRIG3]                                                                                                     |
| 12q15    | 2.49E-31 | 9.48E-11         | chr12:70943933-70965478 | PTPRB                                                                                                       |
| 12q21.2  | 2.73E-25 | 1.13E-10         | chr12:79736117-79762917 | SYT1                                                                                                        |
| 12q21.32 | 1.15E-25 | 3.26E-10         | chr12:88393803-88413151 | C12orf50                                                                                                    |
| 12q21.1  | 1.96E-27 | 3.92E-10         | chr12:72878716-73012572 | TRHDE                                                                                                       |
| 12q22    | 7.91E-12 | 5.52E-10         | chr12:92566742-92683169 | [BTG1]                                                                                                      |
| 12q21.31 | 1.08E-21 | 7.05E-10         | chr12:82982760-83080678 | [TMTC2]                                                                                                     |
| 12q15    | 1.33E-26 | 2.96E-09         | chr12:71378198-71529490 | TSPAN8                                                                                                      |
| 12q21.32 | 2.10E-23 | 3.14E-09         | chr12:88713514-88773481 | [KITLG]                                                                                                     |
| 12q21.1  | 3.42E-26 | 6.65E-09         | chr12:73287594-73429578 | [TRHDE]                                                                                                     |
| 12q14.3  | 5.89E-22 | 9.81E-09         | chr12:65463648-65504923 | WIF1                                                                                                        |
| 12q21.33 | 7.20E-18 | 5.05E-08         | chr12:89535971-89631048 | [DUSP6]                                                                                                     |
| 12q14.1  | 9.81E-09 | 6.43E-08         | chr12:62600958-62702550 | USP15                                                                                                       |
| 12q21.33 | 1.49E-18 | 8.12E-08         | chr12:90539888-90610080 | [LOC338758]                                                                                                 |
| 12q21.2  | 4.49E-21 | 8.50E-08         | chr12:80217967-80294653 | PPP1R12A                                                                                                    |
| 12q14.3  | 4.17E-25 | 1.44E-07         | chr12:65075639-65128692 | GNS, RASSF3                                                                                                 |
| 12q21.31 | 1.53E-13 | 1.64E-07         | chr12:85145696-85218696 | [SLC6A15]                                                                                                   |
| 12q14.1  | 8.80E-09 | 1.71E-07         | chr12:62948831-63172217 | hsa-let-7i, MON2, PPM1H, MIRLET7I                                                                           |
| 12q21.31 | 8.12E-15 | 2.03E-07         | chr12:86012641-86128296 | [RASSF9]                                                                                                    |
| 12q13.13 | 5.95E-09 | 2.52E-07         | chr12:53927486-53984011 | ATF7                                                                                                        |
| 12q14.2  | 7.87E-09 | 2.70E-07         | chr12:63666497-63819353 | [AVPR1A]                                                                                                    |
| 12q21.32 | 9.43E-22 | 5.09E-07         | chr12:87707563-87827675 | [MKRN9P]                                                                                                    |
| 12q13.3  | 1.33E-25 | 6.04E-07         | chr12:57453204-57522995 | LRP1, NAB2, STAT6, TMEM194A                                                                                 |
| 12q21.2  | 2.01E-17 | 6.36E-07         | chr12:76992296-77019877 | [OSBPL8]                                                                                                    |
| 12q13.2  | 1.06E-11 | 6.64E-07         | chr12:55574269-55759877 | OR10A7, OR6C74, OR6C3, OR6C6, OR6C1, OR6C75                                                                 |
| 12q13.13 | 2.11E-09 | 6.65E-07         | chr12:53343710-53424773 | EIF4B, KRT18                                                                                                |
| 12q21.2  | 5.93E-20 | 7.50E-07         | chr12:77318912-77389164 | [E2F7]                                                                                                      |
| 12q21.31 | 7.35E-19 | 7.78E-07         | chr12:82698998-82738458 | [CCDC59]                                                                                                    |
| 12q21.2  | 1.12E-16 | 8.38E-07         | chr12:78728204-78807277 | [NAV3]                                                                                                      |
| 12q13.12 | 7.54E-07 | 9.30E-07         | chr12:49608262-49667984 | TUBA1C                                                                                                      |

|          |            |            |                           |                                                                                               |
|----------|------------|------------|---------------------------|-----------------------------------------------------------------------------------------------|
| 12q14.3  | 6.64E-25   | 1.24E-06   | chr12:66600289-66776259   | IRAK3, GRIP1, HELB                                                                            |
| 12q21.2  | 7.22E-16   | 1.55E-06   | chr12:77541499-77566243   | [E2F7]                                                                                        |
| 12q21.2  | 6.27E-22   | 1.59E-06   | chr12:79523530-79606748   | SYT1                                                                                          |
| 12q21.31 | 2.38E-15   | 1.79E-06   | chr12:85678997-85746111   | ALX1                                                                                          |
| 12q21.32 | 6.64E-14   | 2.99E-06   | chr12:86789648-86861565   | MGAT4C                                                                                        |
| 12q14.1  | 1.61E-19   | 3.82E-06   | chr12:58410811-58599712   | [XRCC6BP1]                                                                                    |
| 17q21.31 | 4.24E-06   | 4.24E-06   | chr17:41609142-42144467   | DUSP3, ETV4, MEOX1, MPP2, MPP3, PPY, PYY, FAM215A, SOST, TMEM101, LSM12, CD300LG, NAGS,       |
| 12q21.1  | 1.46E-17   | 5.35E-06   | chr12:75546360-75575307   | KCNC2                                                                                         |
| 12q13.3  | 1.90E-36   | 6.94E-06   | chr12:56924834-56989741   | RBMS2, BAZ2A                                                                                  |
| 12q21.1  | 1.49E-24   | 7.56E-06   | chr12:71968779-72017798   | LGR5, ZFC3H1                                                                                  |
| 12q21.31 | 1.80E-21   | 1.87E-05   | chr12:80462880-80582644   | [OTOGI]                                                                                       |
| 12q22    | 1.88E-09   | 2.12E-05   | chr12:96068601-96096555   | NTN4                                                                                          |
| 12q14.1  | 4.36E-10   | 2.51E-05   | chr12:59843862-59929430   | [SLC16A7]                                                                                     |
| 12q21.31 | 1.02E-18   | 3.25E-05   | chr12:80847423-80888666   | PTPRQ                                                                                         |
| 12q21.1  | 1.77E-17   | 4.80E-05   | chr12:75295648-75394252   | [KCNC2]                                                                                       |
| 12q13.11 | 2.23E-05   | 4.97E-05   | chr12:46526458-46567887   | [SLC38A1]                                                                                     |
| 12q14.1  | 1.30E-08   | 5.52E-05   | chr12:61348386-61480085   | [FAM19A2]                                                                                     |
| 12q23.1  | 2.68E-06   | 6.02E-05   | chr12:98207978-98300149   | [MIR4303]                                                                                     |
| 12q21.2  | 2.36E-13   | 6.05E-05   | chr12:77774632-77813991   | [E2F7]                                                                                        |
| 1q23.3   | 8.32E-06   | 6.24E-05   | chr1:160751106-160809002  | LY9, CD244                                                                                    |
| 12q23.1  | 3.72E-08   | 7.21E-05   | chr12:97013606-97053901   | [CDK17]                                                                                       |
| 12q14.1  | 1.92E-10   | 8.64E-05   | chr12:60184771-60276564   | [SLC16A7]                                                                                     |
| 12q21.31 | 1.50E-09   | 9.43E-05   | chr12:84710125-84744437   | [SLC6A15]                                                                                     |
| 12q12    | 3.84E-06   | 0.000154   | chr12:45450858-45494764   | RACGAP1P                                                                                      |
| 12q22    | 4.95E-13   | 0.00017672 | chr12:95444835-95546016   | NR2C1, FGD6                                                                                   |
| 12q21.33 | 1.46E-16   | 0.00017759 | chr12:89916382-89933762   | GALNT4, POC1B, POC1B-GALNT4                                                                   |
| 12q13.13 | 8.37E-07   | 0.00020654 | chr12:52810539-52879947   | KRT6B, KRT75, KRT6C                                                                           |
| 12q14.1  | 3.52E-08   | 0.00022705 | chr12:59417689-59639968   | [LRIG3]                                                                                       |
| 12q23.1  | 4.40E-07   | 0.00023904 | chr12:100547500-100572161 | GOLGA2P5                                                                                      |
| 12q21.2  | 3.01E-14   | 0.00025516 | chr12:78418420-78456598   | NAV3                                                                                          |
| 12q21.1  | 8.69E-16   | 0.00027506 | chr12:74182932-74208602   | [LOC100507377]                                                                                |
| 12q21.1  | 3.21E-13   | 0.00029192 | chr12:75051434-75164406   | [ATXN7L3B]                                                                                    |
| 12q22    | 1.44E-13   | 0.00030197 | chr12:94654987-94782779   | PLXNC1, CCDC41                                                                                |
| 12q14.2  | 9.26E-06   | 0.00041503 | chr12:63220748-63334198   | PPM1H                                                                                         |
| 12q23.1  | 2.98E-06   | 0.00062566 | chr12:100332104-100419161 | ANKS1B                                                                                        |
| 1q23.1   | 0.00016128 | 0.00082054 | chr1:158000741-158278474  | CD1A, CD1C, CD1D, KIRREL, LOC646268                                                           |
| 12q23.1  | 0.00065456 | 0.00086273 | chr12:98834126-98923755   | TMPO, SLC9A7P1                                                                                |
| 12q13.13 | 6.14E-06   | 0.00086273 | chr12:52483534-52532817   | [C12orf44]                                                                                    |
| 12q23.1  | 4.75E-05   | 0.00089164 | chr12:99848181-99874575   | ANKS1B                                                                                        |
| 12q21.31 | 4.99E-15   | 0.00094693 | chr12:84019009-84190812   | [TMTC2]                                                                                       |
| 12q15    | 5.78E-25   | 0.00099307 | chr12:70607668-70645684   | CNOT2                                                                                         |
| 12q12    | 2.12E-05   | 0.0010225  | chr12:45169682-45313419   | NELL2                                                                                         |
| 12q21.2  | 1.77E-16   | 0.0010312  | chr12:79075438-79135050   | [SYT1]                                                                                        |
| 12q21.1  | 8.57E-21   | 0.001125   | chr12:72643879-72779721   | TRHDE                                                                                         |
| 12q12    | 0.0012404  | 0.0012923  | chr12:43939624-44001553   | ADAMTS20                                                                                      |
| 14q32.33 | 0.00078322 | 0.0013402  | chr14:106215124-106294282 | [ELK2AP]                                                                                      |
| 6q23.3   | 0.00078322 | 0.0014818  | chr6:138520936-138745177  | HEBP2, KIAA1244, NHSL1, PBOV1                                                                 |
| 12q24.11 | 0.00019713 | 0.0015205  | chr12:111245630-111426789 | MYL2, CCDC63                                                                                  |
| 12q21.33 | 1.08E-09   | 0.0015443  | chr12:91504664-91565342   | DCN, LUM                                                                                      |
| 12q23.3  | 0.0012404  | 0.0015495  | chr12:104724261-104746325 | TXNRD1                                                                                        |
| 12q21.32 | 9.02E-14   | 0.0019875  | chr12:87280697-87342208   | [MGAT4C]                                                                                      |
| 12q23.2  | 9.52E-05   | 0.0020604  | chr12:102605576-102619502 | [PMCH]                                                                                        |
| 1q24.2   | 0.00045132 | 0.0022604  | chr1:168141891-169238557  | hsa-mir-557, ATP1B1, DPT, XCL1, XCL2, TBX19, NME7, MGC4473, ANKRD36BP1, TIPRL, SFT2D2, MIR557 |
| 12q23.1  | 4.24E-06   | 0.0023509  | chr12:97650249-97672157   | [RMST]                                                                                        |
| 12q14.1  | 1.67E-12   | 0.0028211  | chr12:59021743-59046844   | [LRIG3]                                                                                       |
| 12q14.2  | 4.08E-05   | 0.0029291  | chr12:63422361-63436792   | [PPM1H]                                                                                       |
| 12q24.11 | 0.00094693 | 0.0030408  | chr12:110382490-110466069 | GIT2, ANKRD13A                                                                                |
| 12q14.1  | 2.70E-07   | 0.0035065  | chr12:60759438-61003195   | [SLC16A7]                                                                                     |
| 12q14.1  | 9.07E-05   | 0.0040852  | chr12:62324725-62380941   | FAM19A2                                                                                       |
| 12q24.12 | 0.0011377  | 0.0042559  | chr12:111892189-111919644 | ATXN2                                                                                         |
| 12q14.3  | 8.12E-15   | 0.0044775  | chr12:65850823-65917357   | MSRB3                                                                                         |
| 12q23.1  | 8.32E-06   | 0.0049121  | chr12:101334651-101368023 | ANO4                                                                                          |
| 12q23.1  | 2.70E-07   | 0.0051776  | chr12:96238300-96391333   | HAL, SNRPF, CCDC38, AMDHD1                                                                    |
| 12q21.2  | 3.21E-13   | 0.0053944  | chr12:76392166-76419227   | PHLDA1                                                                                        |

|          |            |           |                           |                                                                                                                                                                                                                                                                                                                                 |
|----------|------------|-----------|---------------------------|---------------------------------------------------------------------------------------------------------------------------------------------------------------------------------------------------------------------------------------------------------------------------------------------------------------------------------|
| 1q21.2   | 0.00037251 | 0.0063047 | chr1:148649898-148693459  | [PPIAL4E]                                                                                                                                                                                                                                                                                                                       |
| 6q24.3   | 0.00094693 | 0.006865  | chr6:147713527-148943173  | SASH1, SAMD5                                                                                                                                                                                                                                                                                                                    |
| 12q23.2  | 8.64E-05   | 0.009675  | chr12:101772603-101864792 | ARL1, UTP20                                                                                                                                                                                                                                                                                                                     |
| 14q32.31 | 0.0057773  | 0.011014  | chr14:101652467-101955221 | [DIO3OS]                                                                                                                                                                                                                                                                                                                        |
| 15q26.2  | 0.012629   | 0.012629  | chr15:96650942-102531392  | hsa-mir-1302-10, hsa-mir-1469, ALDH1A3, IGF1R, MEF2A, PCSK6, SNRPA1, NR2F2, CHSY1, SYNM, OR4F4, LINS, SELS, TTC23, LRRK1, TM2D3, ARRDC4, LOC91948, TARSL2, LRRC28, ASB7, LYSMD4, PGPEP1L, SPATA8, ADAMTS17, DNM1P46, CERS3, FAM169B, WASH3P, FLJ42289, OR4F6, OR4F15, FAM138E, GPCRLTM7, DDX11L1, DDX11L9, MIR1469, MIR4714     |
| 12q24.21 | 0.011528   | 0.014651  | chr12:114176778-114476804 | RBM19                                                                                                                                                                                                                                                                                                                           |
| 8q24.23  | 0.010125   | 0.015158  | chr8:136923254-137150156  | [KHDRBS3]                                                                                                                                                                                                                                                                                                                       |
| 1q25.1   | 0.0062593  | 0.017244  | chr1:173327552-173541183  | PRDX6, SLC9A11                                                                                                                                                                                                                                                                                                                  |
| 12q12    | 0.018583   | 0.018583  | chr12:39656895-39939197   | KIF21A                                                                                                                                                                                                                                                                                                                          |
| 12q14.1  | 0.00030592 | 0.020125  | chr12:62000764-62188217   | FAM19A2                                                                                                                                                                                                                                                                                                                         |
| 12q11    | 0.021359   | 0.021359  | chr12:37942623-38105137   | [ALG10B]                                                                                                                                                                                                                                                                                                                        |
| 12q13.12 | 0.021359   | 0.021359  | chr12:51141410-51188406   | ATF1, DIP2B                                                                                                                                                                                                                                                                                                                     |
| 11p15.5  | 0.021922   | 0.021922  | chr11:1493610-2440988     | hsa-mir-483, hsa-mir-675, hsa-mir-4298, ASCL2, CD81, CTSD, DUSP8, IGF2, INS, LSP1, MRPL23, TH, TNNI2, TNNT3, TSPAN32, TSSC4, C11orf21, TRPM5, IGF2-AS1, MOB2, SYT8, H19, LOC338651, KRTAP5-1, KRTAP5-3, KRTAP5-4, FAM99A, IFITM10, KRTAP5-5, KRTAP5-2, KRTAP5-6, MIR483, INS-IGF2, MIR675, FAM99B, MRPL23-AS1, MIR4298, MIR4686 |
| 12q22    | 6.10E-05   | 0.024886  | chr12:93624248-93755874   | LOC643339                                                                                                                                                                                                                                                                                                                       |
| 12q24.21 | 0.021922   | 0.027663  | chr12:115698857-115834550 | [MED13L]                                                                                                                                                                                                                                                                                                                        |
| 12q13.12 | 0.025983   | 0.030714  | chr12:50202854-50277128   | FAIM2, NCKAP5L, BCDIN3D                                                                                                                                                                                                                                                                                                         |
| 12q24.11 | 0.010594   | 0.031354  | chr12:109683852-109877180 | ACACB, FOXN4, MYO1H                                                                                                                                                                                                                                                                                                             |
| 1q21.2   | 0.0017956  | 0.034349  | chr1:147288502-148224707  | GJA8, NBPF14, GPR89B, PPIAL4A, NBPF11, FLJ39739, PPIAL4D, PPIAL4B, NBPF24, GPR89C, PDZK1P1, PPIAL4F                                                                                                                                                                                                                             |
| 8q21.11  | 0.032181   | 0.037383  | chr8:75644440-75764714    | PI15, FLJ39080                                                                                                                                                                                                                                                                                                                  |
| 6q21     | 0.023015   | 0.039083  | chr6:112232987-112817910  | LAMA4, WISP3, TUBE1, RFPL4B,                                                                                                                                                                                                                                                                                                    |
| 12q24.22 | 0.037602   | 0.046497  | chr12:117359191-117632025 | FBXO21, FBXW8, TESC                                                                                                                                                                                                                                                                                                             |
| 6q24.2   | 0.029688   | 0.053518  | chr6:143047908-143589459  | HIVEP2, AIG1                                                                                                                                                                                                                                                                                                                    |
| 12q13.11 | 0.026853   | 0.054779  | chr12:48013967-48354605   | VDR, ENDOU, RAPGEF3, HDAC7, SLC48A1, RPAP3                                                                                                                                                                                                                                                                                      |
| 12p12.3  | 0.061223   | 0.061223  | chr12:18149710-18301820   | REGL                                                                                                                                                                                                                                                                                                                            |
| 6q24.3   | 0.0085516  | 0.064043  | chr6:146662835-146767661  | GRM1                                                                                                                                                                                                                                                                                                                            |
| 8q24.21  | 0.045206   | 0.066102  | chr8:130528750-130601284  | [GSDMC]                                                                                                                                                                                                                                                                                                                         |
| 1q23.3   | 0.014125   | 0.078537  | chr1:162124288-162857080  | hsa-mir-556, DDR2, UAP1, NOS1AP, HSD17B7, SH2D1B, UHMK1, MIR556, MIR4654                                                                                                                                                                                                                                                        |

## Deletions

| Cytoband | q value    | Residual q value | Wide peak boundaries     | Genes in wide peak                                          |
|----------|------------|------------------|--------------------------|-------------------------------------------------------------|
| 8p23.1   | 7.42E-13   | 8.31E-13         | chr8:12285821-12604205   | MIR3926-2, MIR3926-1                                        |
| 16q23.1  | 3.07E-09   | 3.07E-09         | chr16:74429966-74662596  | GLG1, CLEC18B                                               |
| 17q11.2  | 3.07E-09   | 3.07E-09         | chr17:31334560-31938864  | ACCN1, AA06                                                 |
| 1q31.3   | 3.81E-08   | 3.81E-08         | chr1:196709224-196859198 | CFHR1, CFHR3                                                |
| 4q31.21  | 2.43E-07   | 2.43E-07         | chr4:144806610-145030545 | GYPB                                                        |
| 18p11.21 | 2.43E-07   | 2.43E-07         | chr18:14467007-18603221  | hsa-mir-3156-2, ANKRD30B, POTEC, CXADRP3, MIR3156-2         |
| 7p11.2   | 4.51E-07   | 4.51E-07         | chr7:56559513-57188361   | hsa-mir-4283-1, DKFZp434L192, MIR4283-2, MIR4283-1          |
| 9q22.33  | 8.80E-07   | 8.80E-07         | chr9:99796460-100005889  | LOC340508                                                   |
| 3q29     | 1.18E-06   | 1.18E-06         | chr3:196707953-196923274 | DLG1, MFI2, MFI2-AS1                                        |
| 3p12.3   | 7.30E-06   | 7.30E-06         | chr3:74567976-75476954   | MIR4444-1                                                   |
| 4q13.3   | 7.25E-06   | 7.30E-06         | chr4:75305801-75675840   | AREG                                                        |
| 10q11.23 | 1.72E-05   | 1.72E-05         | chr10:51564018-51785816  | NCOA4, AGAP6, TIMM23                                        |
| 1p36.13  | 1.82E-05   | 1.82E-05         | chr1:16573098-148764767  | hsa-mir-3118-3, RUNX3, CDKN2C, FABP3, ARID1A, BCAR3, SERBP1 |
| 1p22.2   | 4.44E-05   | 4.44E-05         | chr1:89850349-89992530   | GBP1P1                                                      |
| 11p11.12 | 9.43E-05   | 0.00015905       | chr11:48507373-49981191  | FOLH1, TRIM64C                                              |
| 20p11.1  | 0.00018061 | 0.00018061       | chr20:26028883-29695949  | hsa-mir-663, MLLT10P1, NCOR1P1, FAM182A, FRG1B, MIR663A     |
| 1q43     | 0.00023648 | 0.00023648       | chr1:242153019-243224174 | PLD5, MAP1LC3C                                              |

|          |            |            |                          |                                                                                                                                                                                                                                                                                                                                                                                                                                                                                                                                                                                                                                                                                                                                                                                                                                                                                                                                                                                                                                                                                                                                                                                                                                                                                                                                                                                                                                                                                                                                                                                                                                                                                             |
|----------|------------|------------|--------------------------|---------------------------------------------------------------------------------------------------------------------------------------------------------------------------------------------------------------------------------------------------------------------------------------------------------------------------------------------------------------------------------------------------------------------------------------------------------------------------------------------------------------------------------------------------------------------------------------------------------------------------------------------------------------------------------------------------------------------------------------------------------------------------------------------------------------------------------------------------------------------------------------------------------------------------------------------------------------------------------------------------------------------------------------------------------------------------------------------------------------------------------------------------------------------------------------------------------------------------------------------------------------------------------------------------------------------------------------------------------------------------------------------------------------------------------------------------------------------------------------------------------------------------------------------------------------------------------------------------------------------------------------------------------------------------------------------|
| 19q13.33 | 0.00015905 | 0.00028244 | chr19:48029946-48223862  | GLTSCR1                                                                                                                                                                                                                                                                                                                                                                                                                                                                                                                                                                                                                                                                                                                                                                                                                                                                                                                                                                                                                                                                                                                                                                                                                                                                                                                                                                                                                                                                                                                                                                                                                                                                                     |
| 5q35.2   | 0.00034081 | 0.00034081 | chr5:175346791-175690321 | THOC3, FAM153B                                                                                                                                                                                                                                                                                                                                                                                                                                                                                                                                                                                                                                                                                                                                                                                                                                                                                                                                                                                                                                                                                                                                                                                                                                                                                                                                                                                                                                                                                                                                                                                                                                                                              |
| 18q22.1  | 0.00038108 | 0.00038108 | chr18:61877778-63418257  | LOC400654                                                                                                                                                                                                                                                                                                                                                                                                                                                                                                                                                                                                                                                                                                                                                                                                                                                                                                                                                                                                                                                                                                                                                                                                                                                                                                                                                                                                                                                                                                                                                                                                                                                                                   |
| 15q11.2  | 0.00064488 | 0.00064488 | chr15:23033804-23807870  | NIPA1, GOLGA8IP, WHAMMP3, GOLGA8E, HERC2P2, HERC2P7, MIR4508                                                                                                                                                                                                                                                                                                                                                                                                                                                                                                                                                                                                                                                                                                                                                                                                                                                                                                                                                                                                                                                                                                                                                                                                                                                                                                                                                                                                                                                                                                                                                                                                                                |
| 9p24.3   | 0.0014571  | 0.0014571  | chr9:1-844430            | hsa-mir-1302-9, FOXD4, KANK1, CBWD1, DOCK8, FAM138C, WASH1                                                                                                                                                                                                                                                                                                                                                                                                                                                                                                                                                                                                                                                                                                                                                                                                                                                                                                                                                                                                                                                                                                                                                                                                                                                                                                                                                                                                                                                                                                                                                                                                                                  |
| 7p15.3   | 0.0017031  | 0.0017031  | chr7:22393825-22603428   | STEAP1B                                                                                                                                                                                                                                                                                                                                                                                                                                                                                                                                                                                                                                                                                                                                                                                                                                                                                                                                                                                                                                                                                                                                                                                                                                                                                                                                                                                                                                                                                                                                                                                                                                                                                     |
| 21q11.2  | 0.0036862  | 0.0036862  | chr21:1-14780335         | hsa-mir-3156-3, BAGE, TPTE, BAGE5, BAGE4, BAGE3, BAGE2, ANKRD30BP2, TEKT4P2, MIR3156-3, MIR3687, MIR3648                                                                                                                                                                                                                                                                                                                                                                                                                                                                                                                                                                                                                                                                                                                                                                                                                                                                                                                                                                                                                                                                                                                                                                                                                                                                                                                                                                                                                                                                                                                                                                                    |
| 9p13.1   | 0.0042201  | 0.0042201  | chr9:38616310-68440447   | ZNF658, FAM75A7, CNTNAP3, ANKRD20A1, FAM201A, FOXD4L4, AQP7P1, KGFLP1, FAM75A6, MGC21881, FAM74A1, FAM74A4, ZNF658B, ANKRD20A3, ANKRD20A2, AQP7P3, LOC442421, FAM27A, FAM75A2, FAM75A4, FAM75A1, FAM74A2, KGFLP2, FAM75A3, FAM75A5, FAM74A3, CNTNAP3B, FOXD4L2, FAM27C, FAM95B1, FAM27B                                                                                                                                                                                                                                                                                                                                                                                                                                                                                                                                                                                                                                                                                                                                                                                                                                                                                                                                                                                                                                                                                                                                                                                                                                                                                                                                                                                                     |
| 13q14.2  | 0.0023299  | 0.0042201  | chr13:47469941-50237254  | RCBTB2, MLNR, RB1, SUCLA2, ITM2B, LPAR6, FNDC3A, MED4, PHF11, RCBTB1, NUDT15, CYSLTR2, CDADC1, CAB39L, SETDB2, ARL11                                                                                                                                                                                                                                                                                                                                                                                                                                                                                                                                                                                                                                                                                                                                                                                                                                                                                                                                                                                                                                                                                                                                                                                                                                                                                                                                                                                                                                                                                                                                                                        |
| 19q13.43 | 0.0029344  | 0.0042201  | chr19:56623344-56743680  | ZNF444, ZSCAN5A, GALP, ZSCAN5B                                                                                                                                                                                                                                                                                                                                                                                                                                                                                                                                                                                                                                                                                                                                                                                                                                                                                                                                                                                                                                                                                                                                                                                                                                                                                                                                                                                                                                                                                                                                                                                                                                                              |
| 10p15.3  | 0.0056753  | 0.0056753  | chr10:715352-1034808     | LARP4B                                                                                                                                                                                                                                                                                                                                                                                                                                                                                                                                                                                                                                                                                                                                                                                                                                                                                                                                                                                                                                                                                                                                                                                                                                                                                                                                                                                                                                                                                                                                                                                                                                                                                      |
| 5p15.33  | 0.0063622  | 0.0063622  | chr5:681303-936064       | TRIP13, BRD9, ZDHHC11                                                                                                                                                                                                                                                                                                                                                                                                                                                                                                                                                                                                                                                                                                                                                                                                                                                                                                                                                                                                                                                                                                                                                                                                                                                                                                                                                                                                                                                                                                                                                                                                                                                                       |
| 2q37.3   | 0.0078844  | 0.0078844  | chr2:242275552-242717658 | hsa-mir-3133, BOK, DTYMK, FARP2, STK25, ATG4B, THAP4, ING5, D2HGDH,                                                                                                                                                                                                                                                                                                                                                                                                                                                                                                                                                                                                                                                                                                                                                                                                                                                                                                                                                                                                                                                                                                                                                                                                                                                                                                                                                                                                                                                                                                                                                                                                                         |
| 8p23.1   | 0.0062489  | 0.018584   | chr8:6909101-8178099     | hsa-mir-548i-3, DEFA5, DEFB4A, SPAG11B, DEFB103B, DEFB104A, DEFB105A, DEFB106A, DEFB107A, FLJ10661, LOC349196, DEFB103A, FAM90A13, FAM90A5, FAM90A7, FAM90A8, FAM90A18, FAM90A9, FAM90A10, DEFB107B, DEFB104B, DEFB106B, DEFB105B, DEFB109P1B, FAM90A14, SPAG11A, FAM90A20, FAM90A19, FAM66B, ZNF705G, FAM66E, DEFB4B, MIR548I3                                                                                                                                                                                                                                                                                                                                                                                                                                                                                                                                                                                                                                                                                                                                                                                                                                                                                                                                                                                                                                                                                                                                                                                                                                                                                                                                                             |
| 13q11    | 0.0065013  | 0.018584   | chr13:1-19586753         | ANKRD20A9P                                                                                                                                                                                                                                                                                                                                                                                                                                                                                                                                                                                                                                                                                                                                                                                                                                                                                                                                                                                                                                                                                                                                                                                                                                                                                                                                                                                                                                                                                                                                                                                                                                                                                  |
| 7q36.3   | 0.034436   | 0.034436   | chr7:158347883-158539282 | NCAPG2                                                                                                                                                                                                                                                                                                                                                                                                                                                                                                                                                                                                                                                                                                                                                                                                                                                                                                                                                                                                                                                                                                                                                                                                                                                                                                                                                                                                                                                                                                                                                                                                                                                                                      |
| 18p11.32 | 0.035056   | 0.035056   | chr18:1-3496489          | ADCYAP1, CETN1, TGIF1, TYMS, YES1, MYOM1, USP14, LPIN2, THOC1, NDC80, MYL12A, SMCHD1, CLUL1, ENOSF1, LINC00470, METTL4, COLEC12, EMILIN2, MYL12B, CBX3P2, ROCK1P1                                                                                                                                                                                                                                                                                                                                                                                                                                                                                                                                                                                                                                                                                                                                                                                                                                                                                                                                                                                                                                                                                                                                                                                                                                                                                                                                                                                                                                                                                                                           |
| 2q21.3   | 0.040194   | 0.041272   | chr2:135777505-136298696 | RAB3GAP1, ZRANB3                                                                                                                                                                                                                                                                                                                                                                                                                                                                                                                                                                                                                                                                                                                                                                                                                                                                                                                                                                                                                                                                                                                                                                                                                                                                                                                                                                                                                                                                                                                                                                                                                                                                            |
| 15q25.3  | 0.053856   | 0.055507   | chr15:85486065-85932248  | PDE8A                                                                                                                                                                                                                                                                                                                                                                                                                                                                                                                                                                                                                                                                                                                                                                                                                                                                                                                                                                                                                                                                                                                                                                                                                                                                                                                                                                                                                                                                                                                                                                                                                                                                                       |
| 15q21.1  | 0.091597   | 0.094435   | chr15:29855302-57535954  | ACTC1, B2M, BUB1B, CAPN3, CHRM5, CHRNA7, CKMT1B, CYP19A1, DUT, EPB42, FBN1, FGF7, GABPB1, GALK2, GANC, GATM, GCHFR, PDIA3, HDC, ONECUT1, ITPKA, IVD, LTK, MAP1A, MEIS2, MFAP1, TRPM1, MYO5A, NEDD4, PLCB2, MAPK6, RAB27A, RAD51, RYR3, SCG5, SLC12A1, SORD, SPINT1, SRP14, THBS1, TJP1, TP53BP1, TYRO3, SLC30A4, EIF3J, JMJD7-PLA2G4B, SNAP23, USP8, SLC28A2 CCPG1, COPS2, TGM5, PIGB, PPIP5K1, AQR, SECISBP2L, ARHGAP11A, LCMT2, SLC12A6, BCL2L10, RASGRP1, SERF2, GNB5, ARPP19, SLC27A2, GPR176, CHP, OIP5, BAHD1, FAN1, CEP152, MAPKBP1, GOLGA8A, RTF1, MGA, DMXL2, VPS39, AP4E1, CCNDBP1, EID1, TMEM87A, RPAP1, DKFZP434L187, PYGO1, PLDN, GREM1, RPUSD2, TUBGCP4, SCG3, TMOD3, TMOD2, EHD4, DUOX2, MYEF2, NDUFAF1, RSL24D1, NUSAP1, TMEM85, SPTBN5, CTDSPL2, KLF13, DUOX1, DLL4, INO80, ZNF280D, TRPM7, PPP1R14D, MTMR10, ZNF770, FLJ10038, HAUS2, FAM82A2, DNAJC17, MNS1, NOP10, MYO5C, FAM214A, PAK6, DTWD1, CASC5, AVEN, GJD2, STARD9, VPS18, SQRDL, ZFP106, RFX7, SPATA5L1, CHAC1, ATP8B4, WDR76, TMEM62, SEMA6D, SPG11, ELL3, SPPL2A, ZFYVE19, FRMD5, DISP2, CHRFAM7A, ULK4P3, ULK4P1, ARHGAP11B, ATPBD4, BMF, SHF, DUOXA1, CHST14, CASC4, TGM7, CATSPER2, LEO1, PLA2G4E, TRIM69, FLJ27352, TMCO5A, ZSCAN29, TTBK2, CDAN1, STRC, DYX1C1, CSNK1A1P1, OTUD7A, SPRED1, PGBD4, ADAL, EXD1, FSIP1, RHOV, UBR1, PATL2, LPCAT4, PLA2G4F, LRRC57, LYSDM2, WDR72, HMG2N2P46, SLC24A5, PRTG, FAM98B, PLA2G4D, GLDN, FMN1, MRPL42P5, USP50, TEX9, TNFAIP8L3, SHC4, CTXN2, DUOX2, MIR211, GOLGA8B, EIF2AK4, CATSPER2P1, UNC13C, CKMT1A, SERINC4, PHGR1, MIR626, MIR627, MIR628, ANP32AP1, MIR147B, ANKRD63, JMJD7, PLA2G4B, ULK4P2, MIR1233-1, MIR1266, MIR1282, MIR1233-2, MIR4310, MIR3942, |

|         |          |          |                     |                                                                                                                                                                                                                                                                                                                                                                                                                                                                                                                                                                                                                                                                                                                                                                                                                                                                                                                                                                                                                                                                     |
|---------|----------|----------|---------------------|---------------------------------------------------------------------------------------------------------------------------------------------------------------------------------------------------------------------------------------------------------------------------------------------------------------------------------------------------------------------------------------------------------------------------------------------------------------------------------------------------------------------------------------------------------------------------------------------------------------------------------------------------------------------------------------------------------------------------------------------------------------------------------------------------------------------------------------------------------------------------------------------------------------------------------------------------------------------------------------------------------------------------------------------------------------------|
|         |          |          |                     | DYX1C1-CCPG1, MIR4510, MIR4716, MIR4713, MIR4712, TMCO5B                                                                                                                                                                                                                                                                                                                                                                                                                                                                                                                                                                                                                                                                                                                                                                                                                                                                                                                                                                                                            |
| 11q25   | 0.095602 | 0.099253 | chr11:1-135006516   | hsa-mir-3167, ACAT1, ACP2, ACRV1, ACTN3, ADM, ADRBK1, AP2A2, APLNR, ALDH3B1, ALDH3B2, AMPD3, APBB1, BIRC2, BIRC3, APLP2, APOA1, APOA4, APOC3, ARCN1, RHOG, ARHGAP1, PHOX2A, ARL2, ARNTL, ARRB1, ART1, ASCL2, ATM, FXYD2, BAD, BBS1, CCND1, BDNF, CXCR5, SERPING1, CAPN5, MRPL49, ZNHIT2, MPPED2, DAGLA, CALCA, CALCB, CAPN1, CARS, CASP1, CASP4, CASP5, CAT, CBL, SERPINH1, CCKBR, CD3D, CD3E, CD3G, CD5, CD6, MS4A1, MS4A3, CD44, CD59, CD81, CD151, CDKN1C, CFL1, CTSC, CHEK1, CHKA, TPP1, CLNS1A, CNGA4, CNTF, COPB1, COX8A, CPT1A, CRY2, CRYAB, CST6, CSTF3, CTNND1, CTSD, CTSW, DDB1, DDB2, DDX6, DDX10, DHCR7, DLAT, DLG2, DPAGT1, DRD2, DRD4, DUSP8, EEF1G, EIF4G2, ELF5, MARK2, CTTN, ESRRA, ETS1, EXT2, F2, FANCF, FAU, MS4A2, FDX1, FEN1, FGF3, FGF4, FKBP2, FLI1, FOLH1, FOLR1, FOLR2, FOLR3, FSHB, FTH1, FUT4, SLC37A4, LRRC32, GAS2, GIF, GNG3, GRIA4, GRIK4, GRM5, GSTP1, GTF2H1, GUCY1A2, H2AFX, HBB, HBBP1, HBD, HBE1, HBG1, HBG2, HMBS, SLC29A2, HPX, HRAS, HSPA8, HSPB2, DNAJC4, HTR3A, WNT11, WT1, SF1, EI24, PITPNM1, SF3B2, ROBO4, KDM4D, FAT3 |
| 17p13.3 | 0.095602 | 0.099253 | chr17:19980-1187942 | hsa-mir-3183, ABR, RPH3AL, TIMM22, GEMIN4, GLOD4, RNMTL1, VPS53, NXN, FAM57A, FAM101B, BHLHA9, DBIL5P, MIR3183                                                                                                                                                                                                                                                                                                                                                                                                                                                                                                                                                                                                                                                                                                                                                                                                                                                                                                                                                      |
| 20p13   | 0.09994  | 0.10058  | chr20:1-126855      | DEFB126, DEFB125                                                                                                                                                                                                                                                                                                                                                                                                                                                                                                                                                                                                                                                                                                                                                                                                                                                                                                                                                                                                                                                    |

**Supplementary Table S3: Regions of significant amplifications and deletions identified in LPS cell lines using GISTIC analysis**

**Amplifications**

| <b>Cytoband</b> | <b>q value</b> | <b>Residual q value</b> | <b>Wide peak boundaries</b> | <b>Genes in wide peak</b>                               |
|-----------------|----------------|-------------------------|-----------------------------|---------------------------------------------------------|
| 10p12.31        | 0.00029997     | 0.00039097              | chr10:19655595-19710331     | [PLXDC2]                                                |
| 10p12.31        | 0.00040427     | 0.00051685              | chr10:20896775-20987467     | [MIR4675]                                               |
| 10p12.31        | 0.012372       | 0.016107                | chr10:19012914-19027695     | [ARL5B]                                                 |
| 10p13           | 0.00064375     | 0.00068836              | chr10:14079937-14252604     | FRMD4A                                                  |
| 12p13.33        | 0.055886       | 0.055886                | chr12:1015470-1051585       | RAD52, WNK1                                             |
| 12q14.1         | 1.09E-12       | 7.54E-12                | chr12:58138328-58156509     | CDK4, CYP27B1,TSPAN31                                   |
| 12q14.1         | 6.86E-06       | 0.00061649              | chr12:59800582-59842484     | [SLC16A7]                                               |
| 12q14.1         | 0.00014803     | 0.014673                | chr12:59520401-59634484     | [LRIG3]                                                 |
| 12q14.1         | 0.022007       | 0.023472                | chr12:60724462-60791213     | [SLC16A7]                                               |
| 12q14.2         | 0.0095225      | 0.0098647               | chr12:63602438-63682897     | [AVPR1A]                                                |
| 12q14.3         | 1.23E-10       | 3.74E-08                | chr12:66876205-66905404     | GRIP1                                                   |
| 12q14.3         | 4.28E-08       | 1.57E-06                | chr12:65700498-65737763     | MSRB3                                                   |
| 12q14.3         | 5.36E-06       | 0.00012014              | chr12:66201353-66244291     | HMGA2, RPSAP52                                          |
| 12q14.3         | 5.71E-06       | 0.0016073               | chr12:67136167-67159718     | [GRIP1]                                                 |
| 12q14.3         | 2.14E-05       | 0.0078464               | chr12:67583637-67626635     | [CAND1]                                                 |
| 12q15           | 1.09E-12       | 5.58E-08                | chr12:69120642-69497994     | CPM, MDM2, SLC35E3, NUP107                              |
| 12q15           | 1.09E-12       | 3.26E-07                | chr12:70588640-70948244     | CNOT2, PTPRB, KCNMB4                                    |
| 12q15           | 1.19E-06       | 5.35E-05                | chr12:67976530-68034946     | [DYRK2]                                                 |
| 12q15           | 1.09E-12       | 6.31E-05                | chr12:69833857-70341113     | CCT2, FRS2, RAB3IP, BEST3, LRRC10, MIR3913-2, MIR3913-1 |
| 12q15           | 2.09E-06       | 0.00023026              | chr12:71424403-71499138     | [TSPAN8]                                                |
| 12q15           | 4.33E-05       | 0.00085156              | chr12:68698087-68743910     | MDM1                                                    |
| 12q15           | 0.00029997     | 0.0032901               | chr12:68399872-68418829     | [IFNG]                                                  |
| 12q21.2         | 0.00074323     | 0.00074323              | chr12:79736856-79779416     | SYT1                                                    |
| 12q21.2         | 0.00064375     | 0.00090708              | chr12:77440582-77537764     | E2F7                                                    |
| 12q21.2         | 0.00025681     | 0.0023199               | chr12:76088474-76190013     | [KRR1]                                                  |
| 12q21.2         | 0.0003293      | 0.0031978               | chr12:76599133-76769208     | BBS10, OSBPL8                                           |
| 12q21.2         | 0.010334       | 0.01255                 | chr12:77873500-77886821     | [NAV3]                                                  |
| 12q21.31        | 0.0027937      | 0.0027937               | chr12:83169264-83293247     | TMTC2                                                   |
| 12q21.32        | 0.0011898      | 0.0033447               | chr12:87150442-87214973     | MGAT4C                                                  |
| 12q21.32        | 0.013448       | 0.039649                | chr12:87386836-87455866     | [MGAT4C]                                                |
| 12q21.32        | 0.052864       | 0.052864                | chr12:87964219-88033785     | [MKRN9P]                                                |
| 12q22           | 0.035362       | 0.035362                | chr12:92840475-93121119     | C12orf74                                                |
| 12q22           | 0.064697       | 0.084633                | chr12:95307796-95324036     | [NDUFA12]                                               |
| 12q23.1         | 0.0095225      | 0.011727                | chr12:99770587-99870491     | ANKS1B                                                  |

|          |            |            |                           |                                                                                                     |
|----------|------------|------------|---------------------------|-----------------------------------------------------------------------------------------------------|
| 12q23.1  | 0.011128   | 0.014593   | chr12:99660833-99728573   | ANKS1B                                                                                              |
| 12q23.1  | 0.032263   | 0.041997   | chr12:99542009-99660098   | ANKS1B                                                                                              |
| 12q24.12 | 0.010566   | 0.010566   | chr12:111793040-112146554 | ATXN2, BRAP, SH2B3, ACAD10, FAM109A                                                                 |
| 14q12    | 0.00085156 | 0.00085156 | chr14:31993088-32312099   | NUBPL                                                                                               |
| 14q12    | 0.0027937  | 0.0027937  | chr14:30500354-30701040   | [PRKD1]                                                                                             |
| 14q13.1  | 6.81E-06   | 6.81E-06   | chr14:33548253-33594963   | NPAS3                                                                                               |
| 14q13.2  | 0.080244   | 0.080244   | chr14:35998387-36066502   | INSM2, RALGAPA1                                                                                     |
| 14q13.3  | 0.037354   | 0.037354   | chr14:37045099-37078408   | NKX2-8                                                                                              |
| 1p32.1   | 3.43E-06   | 3.43E-06   | chr1:58820186-60059134    | JUN, TACSTD2, FGGY, MYSM1, OMA1, HSD52,                                                             |
| 1q21.3   | 0.020233   | 0.020233   | chr1:151666369-151893162  | RORC, TDRKH, CELF3, OAZ3, MRPL9, SNX27, THEM4                                                       |
| 1q23.2   | 0.00066944 | 0.00066944 | chr1:159922630-160112740  | ATP1A2, KCNJ9, KCNJ10, SLAMF9, PIGM, IGSF8                                                          |
| 1q23.3   | 0.00039165 | 0.00039165 | chr1:163511426-163581060  | [NUF2]                                                                                              |
| 1q23.3   | 0.097285   | 0.097285   | chr1:164876566-165562499  | LMX1A, RXRG, LRRC52                                                                                 |
| 1q24.1   | 0.0038701  | 0.0038701  | chr1:166155636-166594959  | FMO9P                                                                                               |
| 1q24.2   | 6.86E-06   | 0.00059582 | chr1:169410487-169536239  | F5, SLC19A2                                                                                         |
| 1q24.2   | 7.25E-05   | 0.0041101  | chr1:168235649-168389916  | hsa-mir-557, TBX19, MIR557                                                                          |
| 1q24.3   | 7.55E-06   | 2.75E-05   | chr1:172071716-172342198  | hsa-mir-199a-2, DNM3, MIR199A2, MIR214, MIR3120, DNM3OS                                             |
| 1q25.1   | 0.014763   | 0.014763   | chr1:174414490-174592589  | GPR52, RABGAP1L                                                                                     |
| 1q31.1   | 6.51E-05   | 8.69E-05   | chr1:189552872-189581461  | [FAM5C]                                                                                             |
| 1q31.1   | 0.00078526 | 0.00094477 | chr1:189035126-189098832  | [FAM5C]                                                                                             |
| 1q31.1   | 0.061413   | 0.084633   | chr1:185741998-186722112  | PDC, PTGS2, TPR, PRG4, OCLM, HMCN1                                                                  |
| 1q31.3   | 0.010334   | 0.010334   | chr1:197081823-197302689  | CRB1, ASPM, ZBTB41                                                                                  |
| 1q32.1   | 0.033975   | 0.037354   | chr1:204968544-204993934  | NFASC                                                                                               |
| 1q42.12  | 0.018093   | 0.018876   | chr1:226929445-227019072  | [ITPKB]                                                                                             |
| 1q43     | 0.0095225  | 0.010115   | chr1:241173768-241236902  | RGS7                                                                                                |
| 20q11.23 | 0.017277   | 0.01974    | chr20:35826684-35909293   | GHRH, RPN2                                                                                          |
| 20q12    | 0.008263   | 0.0095225  | chr20:39491982-40266417   | PLCG1, TOP1, ZHX3, LPIN3, CHD6, EMILIN3                                                             |
| 20q12    | 0.044717   | 0.055886   | chr20:40587652-40719391   | PTPRT                                                                                               |
| 20q12    | 0.052864   | 0.06576    | chr20:38717801-38799749   | [MAFB]                                                                                              |
| 2p16.1   | 0.044717   | 0.044717   | chr2:61262135-61318279    | PEX13, KIAA1841                                                                                     |
| 2q33.2   | 0.035362   | 0.042767   | chr2:202882898-205441669  | BMPR2, CD28, CTLA4, SUMO1, FZD7, ABI2, ICOS                                                         |
| 2q36.1   | 0.0093573  | 0.0099329  | chr2:222686400-223195453  | PAX3, CCDC140                                                                                       |
| 5p15.33  | 0.080244   | 0.080244   | chr5:1236691-1308551      | TERT, SLC6A18                                                                                       |
| 5q35.2   | 0.099933   | 0.099933   | chr5:105573854-180915260  | hsa-mir-340, hsa-mir-1229, hsa-mir-4281, hsa-mir-1271, hsa-mir-585, hsa-mir-218-2, hsa-mir-103-1-as |
| 7p15.3   | 0.044717   | 0.044717   | chr7:202180-38711293      | hsa-mir-1200, hsa-mir-548n, hsa-mir-550-2, hsa-mir-550-1, hsa-mir-196b, hsa-mir-148a, hsa-mir-1183  |
| 8q11.21  | 0.017277   | 0.017277   | chr8:51015523-51230278    | SNTG1                                                                                               |
| 8q13.1   | 0.052864   | 0.07074    | chr8:67451231-68167535    | MYBL1, ARFGEF1, COPS5, SGK3, PTTG3P, CSPP1                                                          |
| 8q21.12  | 0.032263   | 0.099933   | chr8:79737017-79998536    | [IL7]                                                                                               |



|         |           |          |                          |              |
|---------|-----------|----------|--------------------------|--------------|
| 8q21.3  | 0.0095225 | 0.0198   | chr8:88440494-88528651   | [CNBD1]      |
| 8q21.3  | 0.01123   | 0.025604 | chr8:93245260-93391781   | [RUNX1T1]    |
| 8q21.3  | 0.015285  | 0.034967 | chr8:90164240-90308656   | [RIPK2]      |
| 8q24.13 | 0.021134  | 0.037354 | chr8:126914647-126970139 | LOC100130231 |
| 9q31.2  | 0.048319  | 0.048319 | chr9:110506875-110910873 | [KLF4]       |

## Deletions

| Cytoband | q value  | Residual q value | Wide peak boundaries     | Genes in wide peak                                                                                                                                                                                                                                                                                                                               |
|----------|----------|------------------|--------------------------|--------------------------------------------------------------------------------------------------------------------------------------------------------------------------------------------------------------------------------------------------------------------------------------------------------------------------------------------------|
| 8p23.3   | 0.008658 | 0.008658         | chr8:1-2793552           | hsa-mir-596, CLN8, MYOM2, DLGAP2, ARHGEF10, KBTBD11, FBXO25, ERICH1, ZNF596, RPL23AP53, MIR596                                                                                                                                                                                                                                                   |
| 2q37.2   | 0.034867 | 0.034867         | chr2:235962488-237091316 | GBX2, AGAP1                                                                                                                                                                                                                                                                                                                                      |
| 3p14.2   | 0.088806 | 0.088806         | chr3:59034499-61552091   | FHIT                                                                                                                                                                                                                                                                                                                                             |
| 16q12.2  | 0.09201  | 0.088806         | chr16:32954256-54321374  | hsa-mir-3181, hsa-mir-1826, ADCY7, CBLN1, CYLD, PHKB, RBL2, SALL1, SIAH1, N4BP1, DNAJA2, ZNF423, RPGRIP1L, ORC6, TP53TG3, TOX3, BRD7, HEATR3, VPS35, NOD2, PAPP5, AKTIP, FTO, IRX3, SHCBP1, CHD9, ITFG1, NETO2, LONP2, GPT2, ABCC11, NKD1, MYLK3, ABCC12, ANKRD26P1, SNX20, CNEP1R1, FLJ26245, UBE2MP1, LINC00273, TP53TG3C, TP53TG3B, MIR548AE2 |

**Supplementary Table S4. Coverage analysis of whole exome sequencing of 12 LPSs and matched adjacent normal tissues in Discovery Cohort**

| Sample ID | Sample type | Bait set      | Captured region | Genome size | Bait size | Mean target coverage | Target coverage >20x |
|-----------|-------------|---------------|-----------------|-------------|-----------|----------------------|----------------------|
| LPS11     | Germline    | SureSelect50M | Whole Exome     | 3095693983  | 51756122  | 208.6891781          | 73.088               |
| LPS11     | Tumor       | SureSelect50M | Whole Exome     | 3095693983  | 51756122  | 298.7831602          | 77.97                |
| LPS12     | Germline    | SureSelect50M | Whole Exome     | 3095693983  | 51756122  | 132.295527           | 69.97                |
| LPS12     | Tumor       | SureSelect50M | Whole Exome     | 3095693983  | 51756122  | 293.2495018          | 83.21                |
| LPS13     | Germline    | SureSelect50M | Whole Exome     | 3095693983  | 51756122  | 176.8267962          | 75.12                |
| LPS13     | Tumor       | SureSelect50M | Whole Exome     | 3095693983  | 51756122  | 165.5077471          | 74.23                |
| LPS19     | Germline    | SureSelect50M | Whole Exome     | 3095693983  | 51756122  | 135.7619357          | 70.38                |
| LPS19     | Tumor       | SureSelect50M | Whole Exome     | 3095693983  | 51756122  | 183.9084983          | 72.92                |
| LPS22     | Germline    | SureSelect50M | Whole Exome     | 3095693983  | 51756122  | 185.807918           | 73.33                |
| LPS22     | Tumor       | SureSelect50M | Whole Exome     | 3095693983  | 51756122  | 144.8161724          | 71.85                |
| LPS55     | Germline    | SureSelect50M | Whole Exome     | 3095693983  | 51756122  | 128.8789802          | 66.26                |
| LPS55     | Tumor       | SureSelect50M | Whole Exome     | 3095693983  | 51756122  | 101.7150395          | 64.26                |
| LPS80     | Germline    | SureSelect50M | Whole Exome     | 3095693983  | 51756122  | 205.7742496          | 84.97                |
| LPS80     | Tumor       | SureSelect50M | Whole Exome     | 3095693983  | 51756122  | 170.7522847          | 80.06                |
| LPS86     | Germline    | SureSelect50M | Whole Exome     | 3095693983  | 51756122  | 198.348464           | 89.19                |
| LPS86     | Tumor       | SureSelect50M | Whole Exome     | 3095693983  | 51756122  | 256.59176            | 96.51                |
| LPS87     | Germline    | SureSelect50M | Whole Exome     | 3095693983  | 51756122  | 181.441421           | 80.51                |
| LPS87     | Tumor       | SureSelect50M | Whole Exome     | 3095693983  | 51756122  | 213.924536           | 94.61                |
| LPS88     | Germline    | SureSelect50M | Whole Exome     | 3095693983  | 51756122  | 174.0940952          | 86.76                |
| LPS88     | Tumor       | SureSelect50M | Whole Exome     | 3095693983  | 51756122  | 237.6752802          | 84.71                |
| LPS89     | Germline    | SureSelect50M | Whole Exome     | 3095693983  | 51756122  | 150.6893255          | 73.43                |
| LPS89     | Tumor       | SureSelect50M | Whole Exome     | 3095693983  | 51756122  | 191.6607602          | 94.6                 |
| LPS90     | Germline    | SureSelect50M | Whole Exome     | 3095693983  | 51756122  | 154.8696351          | 77.87                |
| LPS90     | Tumor       | SureSelect50M | Whole Exome     | 3095693983  | 51756122  | 156.0966313          | 91.19                |

**Supplementary Table S5. Summary of somatic mutations in the Discovery Cohort**

| Sample ID | Gene Symbol     | Chromosome | Genomic position | Nucleotide change (reference variant) | cDNA position | Amino acid position | Amino acid change | Mutation type        |
|-----------|-----------------|------------|------------------|---------------------------------------|---------------|---------------------|-------------------|----------------------|
| LPS11     | <i>INTS2</i>    | chr17      | 59955334         | C G                                   | 2394          | 798                 | S>R               | missense             |
| LPS11     | <i>MDC1</i>     | chr6       | 30673497         | G C                                   | 3463          | 1155                | V>L               | missense             |
| LPS11     | <i>DNAJC14</i>  | chr12      | 56221343         | C G                                   | 1100          | 367                 | S>C               | missense             |
| LPS11     | <i>VEPH1</i>    | chr3       | 157178123        | delA                                  | 376           | 126                 | M>fs              | frameshift deletion  |
| LPS11     | <i>OR6B1</i>    | chr7       | 143701831        | A G                                   | 742           | 248                 | I>V               | missense             |
| LPS11     | <i>MUC12</i>    | chr7       | 100647851        | C G                                   | 14007         | 4669                | H>Q               | missense             |
| LPS11     | <i>WDR96</i>    | chr10      | 105923977        | G A                                   | 3121          | 1041                | V>M               | missense             |
| LPS11     | <i>ZBTB38</i>   | chr3       | 141164779        | G T                                   | 3549          | 1183                | K>N               | missense             |
| LPS11     | <i>MYH3</i>     | chr17      | 10552985         | G A                                   | 551           | 184                 | G>E               | missense             |
| LPS11     | <i>PLBD1</i>    | chr12      | 14706266         | G A                                   | 196           | 66                  | A>T               | missense             |
| LPS11     | <i>PADI2</i>    | chr1       | 17409049         | G T                                   | 1149          | 383                 | K>N               | missense             |
| LPS11     | <i>PRKD3</i>    | chr2       | 37543624         | T G                                   | 44            | 15                  | L>X               | stopgain             |
| LPS11     | <i>SPHKAP</i>   | chr2       | 228890137        | T A                                   | 414           | 138                 | N>K               | missense             |
| LPS11     | <i>RPUSD2</i>   | chr15      | 40863818         | C T                                   | 622           | 208                 | R>W               | missense             |
| LPS11     | <i>STXBP3</i>   | chr1       | 109350028        | G A                                   | 1541          | 514                 | R>H               | missense             |
| LPS11     | <i>GPR109A</i>  | chr12      | 123187530        | C T                                   | 301           | 101                 | R>W               | missense             |
| LPS11     | <i>MYST2</i>    | chr17      | 47893243         | C G                                   | 841           | 281                 | R>G               | missense             |
| LPS11     | <i>FOLR2</i>    | chr11      | 71932639         | delG                                  | 601           | 201                 | G>fs              | frameshift deletion  |
| LPS11     | <i>INTS6</i>    | chr13      | 51957533         | G T                                   | 1112          | 371                 | S>I               | missense             |
| LPS11     | <i>PCDH15</i>   | chr10      | 56128994         | C A                                   | 360           | 120                 | C>X               | stopgain             |
| LPS11     | <i>EBF3</i>     | chr10      | 131676052        | 616                                   | 206           | 206                 | R>G               | missense             |
| LPS11     | <i>MXRA5</i>    | chrX       | 3242785          | C T                                   | 941           | 314                 | P>L               | missense             |
| LPS11     | <i>DNAH17</i>   | chr17      | 76497874         | A C                                   | 5272          | 1758                | T>P               | missense             |
| LPS11     | <i>C8orf80</i>  | chr8       | 27880848         | insC                                  | 2377-2378     | 793                 | G>fs              | frameshift deletion  |
| LPS11     | <i>OTOP3</i>    | chr17      | 72937649         | C T                                   | 235           | 79                  | R>W               | missense             |
| LPS11     | <i>PVRL4</i>    | chr1       | 161043089        | C A                                   | 1234          | 412                 | P>T               | missense             |
| LPS11     | <i>DEFB126</i>  | chr20      | 126310           | del                                   | 313-314       |                     |                   | frameshift deletion  |
| LPS12     | <i>C6orf138</i> | chr6       | 47846301         | T A                                   | 2279          | 760                 | L>X               | stopgain             |
| LPS12     | <i>SEC63</i>    | chr6       | 108214765        | T A                                   | 1595          | 532                 | L>X               | stopgain             |
| LPS12     | <i>C6orf138</i> | chr6       | 47846300         | G T                                   | 2280          | 760                 | L>F               | missense             |
| LPS12     | <i>THSD7A</i>   | chr7       | 11581104         | C A                                   | 1764          | 588                 | N>K               | missense             |
| LPS12     | <i>DARS2</i>    | chr1       | 173826737        | A G                                   | 1832          | 611                 | H>R               | missense             |
| LPS12     | <i>MTDH</i>     | chr8       | 98712005         | C T                                   | 1072          | 358                 | P>Q               | stopgain             |
| LPS12     | <i>USP34</i>    | chr2       | 61472389         | G T                                   | 6583          | 2195                | D>Y               | missense             |
| LPS12     | <i>UBQLNL</i>   | chr11      | 5537428          | C T                                   | 244           | 82                  | H>Y               | missense             |
| LPS12     | <i>EI24</i>     | chr11      | 125448147        | G T                                   | 435           | 145                 | W>C               | missense             |
| LPS12     | <i>CHD6</i>     | chr20      | 40102131         | G A                                   | 2495          | 832                 | R>Q               | missense             |
| LPS12     | <i>PUM1</i>     | chr1       | 31418331         |                                       |               |                     |                   | splice site          |
| LPS12     | <i>ABCC3</i>    | chr17      | 48746831         | C A                                   | 2183          | 728                 | A>D               | missense             |
| LPS12     | <i>FER1L6</i>   | chr8       | 124978508        | insA                                  | 362-363       | 121                 | T.fs              | frameshift insertion |
| LPS12     | <i>CDH11</i>    | chr16      | 65025731         | A G                                   | 751           | 251                 | T>A               | missense             |
| LPS12     | <i>HTR1F</i>    | chr3       | 88040257         | G A                                   | 358           | 120                 | D>N               | missense             |
| LPS13     | <i>ZNF611</i>   | chr19      | 53209796         | A C                                   | 512           | 171                 | Q>P               | missense             |
| LPS13     | <i>SLITRK2</i>  | chrX       | 144904038        | G C                                   | 95            | 32                  | R>P               | missense             |
| LPS13     | <i>MAGEB6</i>   | chrX       | 26212444         | G A                                   | 481           | 161                 | V>I               | missense             |
| LPS13     | <i>LY75</i>     | chr2       | 160697407        | C G                                   | 3340          | 1114                | L>V               | missense             |
| LPS13     | <i>KIAA1370</i> | chr15      | 52906055         |                                       |               |                     |                   | splice site          |

|       |                 |       |           |      |           |      |      |                      |
|-------|-----------------|-------|-----------|------|-----------|------|------|----------------------|
| LPS13 | <i>WDSUB1</i>   | chr2  | 160112728 | C G  | 1111      | 371  | L>V  | missense             |
| LPS13 | <i>GOLIM4</i>   | chr3  | 167750520 | C T  | 964       | 322  | Q>X  | stopgain             |
| LPS13 | <i>CAMKK2</i>   | chr12 | 121706440 |      |           |      |      | splice site          |
| LPS13 | <i>FAN1</i>     | chr15 | 31196935  | delG | 69        | 23   | K>fs | frameshift deletion  |
| LPS13 | <i>GOLIM4</i>   | chr3  | 167750423 | C T  | 1061      | 354  | A>V  | missense             |
| LPS13 | <i>ADH6</i>     | chr4  | 100137360 | G T  | 78        | 26   | E>D  | missense             |
| LPS13 | <i>SEMA3A</i>   | chr7  | 83631303  | G A  | 1420      | 474  | E>K  | missense             |
| LPS13 | <i>ARAF</i>     | chrX  | 47424531  | C T  | 451       | 151  | R>C  | missense             |
| LPS13 | <i>RNF32</i>    | chr7  | 156437272 | G A  | 95        | 32   | R>Q  | missense             |
| LPS13 | <i>NBPF14</i>   | chr1  | 148016431 | G C  | 811       | 271  | D>H  | missense             |
| LPS13 | <i>PDE1C</i>    | chr7  | 31912990  | C A  | 524       | 175  | S>Y  | missense             |
| LPS13 | <i>PRPS1L1</i>  | chr7  | 18066969  | A C  | 437       | 146  | Y>S  | missense             |
| LPS13 | <i>PRPS1L1</i>  | chr7  | 18066972  | T G  | 434       | 145  | L>W  | missense             |
| LPS13 | <i>GOLIM4</i>   | chr3  | 167747683 | C T  | 1318      | 440  | Q>X  | stopgain             |
| LPS13 | <i>CADM1</i>    | chr11 | 115085349 | G C  | 973       | 325  | D>H  | missense             |
| LPS13 | <i>TYW1</i>     | chr7  | 66489956  | A C  | 931       | 311  | I>L  | missense             |
| LPS13 | <i>CADM1</i>    | chr11 | 115085466 | G A  | 856       | 286  | E>K  | missense             |
| LPS13 | <i>TYR</i>      | chr11 | 88924547  | G A  | 997       | 333  | D>N  | missense             |
| LPS13 | <i>PRPS1L1</i>  | chr7  | 18066970  | T A  | 436       | 146  | Y>N  | missense             |
| LPS13 | <i>CCDC88C</i>  | chr14 | 91780245  | C T  | 1915      | 639  | R>X  | stopgain             |
| LPS13 | <i>MGAT3</i>    | chr22 | 39884328  | G A  | 976       | 326  | G>S  | missense             |
| LPS13 | <i>ROBO1</i>    | chr3  | 79174663  | G A  | 115       | 39   | D>N  | missense             |
| LPS13 | <i>PRUNE2</i>   | chr9  | 79251444  | T C  | 8993      | 2998 | I>T  | missense             |
| LPS13 | <i>SPATA3</i>   | chr2  | 231861092 | G T  | 144       | 48   | Q>H  | missense             |
| LPS13 | <i>TP53TG5</i>  | chr20 | 44004156  | T A  | 291       | 97   | N>K  | missense             |
| LPS13 | <i>SLC38A10</i> | chr17 | 79225074  | insA | 2284-2285 | 762  | H>fs | frameshift insertion |
| LPS13 | <i>CGNL1</i>    | chr15 | 57731031  | C A  | 834       | 278  | F>L  | missense             |
| LPS13 | <i>PCMTD1</i>   | chr8  | 52732981  | G C  | 1004      | 335  | R>T  | missense             |
| LPS19 | <i>OR8H2</i>    | chr11 | 55872750  | G A  | 232       | 78   | V>I  | missense             |
| LPS19 | <i>TTI1</i>     | chr20 | 36640690  | A G  | 1529      | 510  | E>G  | missense             |
| LPS19 | <i>KIAA2026</i> | chr9  | 5923195   | C T  | 2801      | 934  | S>F  | missense             |
| LPS19 | <i>ZMYM4</i>    | chr1  | 35846897  | delT | 1219      | 407  | F>fs | frameshift deletion  |
| LPS19 | <i>DRGX</i>     | chr10 | 50599241  | G A  | 116       | 39   | R>H  | missense             |
| LPS19 | <i>OR2A14</i>   | chr7  | 143826338 | T G  | 133       | 45   | F>V  | missense             |
| LPS19 | <i>SEZ6L</i>    | chr22 | 26709785  | G C  | 1932      | 644  | W>C  | missense             |
| LPS19 | <i>COG5</i>     | chr7  | 107188579 | A G  | 487       | 163  | T>A  | missense             |
| LPS19 | <i>CCDC93</i>   | chr2  | 118743603 | G A  | 562       | 188  | A>T  | missense             |
| LPS19 | <i>RNF182</i>   | chr6  | 13977564  | T A  | 214       | 72   | C>S  | missense             |
| LPS19 | <i>DPP6</i>     | chr7  | 154645537 | A C  | 1714      | 572  | K>Q  | splice site          |
| LPS19 | <i>USP48</i>    | chr1  | 22055167  | A T  | 1346      | 449  | E>V  | missense             |
| LPS19 | <i>HEPHL1</i>   | chr11 | 93778983  | G T  | 315       | 105  | R>S  | missense             |
| LPS19 | <i>CACNA1D</i>  | chr3  | 53835356  | G T  | 5312      | 1771 | R>L  | missense             |
| LPS19 | <i>DOCK4</i>    | chr7  | 111407174 | delT | 3802      | 1268 | C>fs | frameshift deletion  |
| LPS19 | <i>ZNF75D</i>   | chrX  | 134421124 | T G  | 1478      | 493  | L>R  | missense             |
| LPS19 | <i>DST</i>      | chr6  | 56504124  | T C  | 1286      | 429  | I>T  | missense             |
| LPS19 | <i>MYO3A</i>    | chr10 | 26385530  | A T  | 1695      | 565  | Q>H  | missense             |
| LPS19 | <i>RYR2</i>     | chr1  | 237811806 | G T  | 7405      | 2469 | V>F  | missense             |
| LPS19 | <i>PHKA1</i>    | chrX  | 71838560  | A C  | 2369      | 790  | K>T  | splice site          |
| LPS19 | <i>ADAMTSL3</i> | chr15 | 84659942  | G A  | 3949      | 1317 | V>M  | missense             |
| LPS19 | <i>CYP2C19</i>  | chr10 | 96541590  | T C  | 655       | 219  | F>L  | missense             |
| LPS19 | <i>ZPBP</i>     | chr7  | 50057893  | A C  | 723       | 241  | E>D  | missense             |
| LPS19 | <i>FLG</i>      | chr1  | 152276236 | C T  | 11126     | 3709 | S>F  | missense             |
| LPS19 | <i>NPFFR2</i>   | chr4  | 72994349  | A T  | 41        | 14   | H>L  | missense             |

|       |                 |       |           |     |      |      |     |             |
|-------|-----------------|-------|-----------|-----|------|------|-----|-------------|
| LPS19 | <i>C4orf41</i>  | chr4  | 184614297 | C T | 2234 | 745  | T>I | missense    |
| LPS19 | <i>WFS1</i>     | chr4  | 6302889   | G T | 1367 | 456  | R>L | missense    |
| LPS19 | <i>OR51B4</i>   | chr11 | 5323119   | G A | 58   | 20   | A>T | missense    |
| LPS19 | <i>NEUROD4</i>  | chr12 | 55420831  | A C | 608  | 203  | N>T | missense    |
| LPS19 | <i>ROS1</i>     | chr6  | 117683862 | C G | 3285 | 1095 | N>K | missense    |
| LPS19 | <i>TNC</i>      | chr9  | 117810785 | A C | 4606 | 1536 | T>P | missense    |
| LPS19 | <i>PTPRK</i>    | chr6  | 128298118 | G T | 3793 | 1265 | D>Y | missense    |
| LPS19 | <i>TECTB</i>    | chr10 | 114053589 | T G | 577  | 193  | L>V | missense    |
| LPS19 | <i>F8</i>       | chrX  | 154133245 | T G | 5427 | 1809 | I>M | missense    |
| LPS19 | <i>CSMD2</i>    | chr1  | 34166152  | A G | 3578 | 1193 | E>G | missense    |
| LPS19 | <i>STXBP5L</i>  | chr3  | 121126206 | G A | 2776 | 926  | E>K | missense    |
| LPS19 | <i>APBA2</i>    | chr15 | 29393960  | G T | 1497 | 499  | M>I | missense    |
| LPS19 | <i>NCKAP1L</i>  | chr12 | 54905623  | C T | 622  | 208  | R>C | missense    |
| LPS19 | <i>OR4C3</i>    | chr11 | 48347099  | G T | 607  | 203  | A>S | missense    |
| LPS19 | <i>GPSM2</i>    | chr1  | 109465168 | T A | 1570 | 524  | S>T | missense    |
| LPS19 | <i>OR6N1</i>    | chr1  | 158736021 | G T | 452  | 151  | G>V | missense    |
| LPS19 | <i>CPA3</i>     | chr3  | 148601596 | G T | 975  | 325  | E>D | missense    |
| LPS19 | <i>OR51I1</i>   | chr11 | 5462147   | T A | 598  | 200  | Y>N | missense    |
| LPS19 | <i>ZNF169</i>   | chr9  | 97062120  | A C | 280  | 944  | S>R | missense    |
| LPS19 | <i>DLG4</i>     | chr17 | 7099860   | A T | 1247 | 416  | E>V | missense    |
| LPS19 | <i>FRG1</i>     | chr4  | 190876305 | A T | 4311 | 144  | N>I | splice site |
| LPS19 | <i>DLG2</i>     | chr11 | 83170874  | A T | 2600 | 867  | K>M | missense    |
| LPS19 | <i>MYF5</i>     | chr12 | 81112787  | C T | 725  | 242  | T>I | missense    |
| LPS19 | <i>HSD17B2</i>  | chr16 | 82104644  | C A | 576  | 192  | N>K | missense    |
| LPS19 | <i>ADAMTS4</i>  | chr1  | 161167964 | G A | 454  | 152  | V>M | missense    |
| LPS19 | <i>SCN3A</i>    | chr2  | 166032778 | A G | 127  | 43   | N>D | missense    |
| LPS19 | <i>TSR2</i>     | chrX  | 54469838  | T G | 178  | 60   | L>V | missense    |
| LPS19 | <i>MIPOL1</i>   | chr14 | 37754605  | A C | 576  | 192  | R>S | missense    |
| LPS19 | <i>CADM1</i>    | chr11 | 115111057 | G A | 208  | 70   | D>N | missense    |
| LPS19 | <i>TBX19</i>    | chr1  | 168250438 | C T | 110  | 37   | T>M | missense    |
| LPS19 | <i>DBX2</i>     | chr12 | 45410076  | C T | 1013 | 338  | A>V | missense    |
| LPS19 | <i>DUSP27</i>   | chr1  | 167096065 | G A | 1697 | 566  | S>N | missense    |
| LPS19 | <i>MCF2</i>     | chrX  | 138689933 | A C | 1587 | 529  | E>D | missense    |
| LPS19 | <i>TBC1D8B</i>  | chrX  | 106083284 | G A | 1360 | 454  | E>K | missense    |
| LPS19 | <i>TRPC3</i>    | chr4  | 122833094 | T C | 1496 | 499  | I>T | missense    |
| LPS19 | <i>SOX5</i>     | chr12 | 23687304  | G A | 2102 | 701  | G>D | missense    |
| LPS19 | <i>NOX3</i>     | chr6  | 155732371 | C T | 1432 | 478  | L>F | missense    |
| LPS19 | <i>WDR16</i>    | chr17 | 9532040   | G A | 873  | 291  | W>X | stopgain    |
| LPS19 | <i>POLE</i>     | chr12 | 133210961 | G T | 5815 | 1939 | D>Y | missense    |
| LPS19 | <i>NEFL</i>     | chr8  | 24811149  | A C | 1330 | 444  | T>P | missense    |
| LPS19 | <i>HEATR4</i>   | chr14 | 73989616  | C T | 100  | 34   | R>X | stopgain    |
| LPS19 | <i>BTBD7</i>    | chr14 | 93714934  | T C | 2009 | 670  | V>A | missense    |
| LPS19 | <i>POLN</i>     | chr4  | 2172860   | C T | 1423 | 475  | R>W | missense    |
| LPS19 | <i>LCP1</i>     | chr13 | 46721106  | T A | 1111 | 371  | F>I | missense    |
| LPS19 | <i>DCHS2</i>    | chr4  | 155249343 | T G | 3920 | 1307 | V>G | splice site |
| LPS19 | <i>ADAMDEC1</i> | chr8  | 24251599  | A C | 65   | 22   | D>A | missense    |
| LPS22 | <i>ZNF135</i>   | chr19 | 58578553  | G A | 737  | 246  | R>Q | missense    |
| LPS22 | <i>STOX1</i>    | chr10 | 70645656  | G T | 2102 | 702  | D>Y | missense    |
| LPS22 | <i>FAT3</i>     | chr11 | 92532456  | G A | 6277 | 2093 | V>I | missense    |
| LPS22 | <i>DEFB136</i>  | chr8  | 11831558  | T A | 125  | 42   | F>Y | missense    |
| LPS22 | <i>ST8SIA3</i>  | chr18 | 55024338  | G A | 497  | 166  | G>E | missense    |
| LPS22 | <i>DOPEY1</i>   | chr6  | 83847067  | G T | 3279 | 1093 | Q>H | missense    |
| LPS22 | <i>HEG1</i>     | chr3  | 124728625 | G A | 3117 | 1039 | M>I | missense    |

|       |                   |       |           |      |       |      |      |                     |
|-------|-------------------|-------|-----------|------|-------|------|------|---------------------|
| LPS22 | <i>OR5M3</i>      | chr11 | 56237775  | G T  | 199   | 67   | V>F  | missense            |
| LPS22 | <i>PIK3CA</i>     | chr3  | 178952072 | A G  | 3127  | 1043 | M>V  | missense            |
| LPS22 | <i>MIA2</i>       | chr14 | 39716604  | C T  | 826   | 276  | H>Y  | missense            |
| LPS22 | <i>CSMD3</i>      | chr8  | 113299314 | G A  | 8803  | 2935 | G>R  | missense            |
| LPS22 | <i>SPOCK3</i>     | chr4  | 167921546 | G A  | 304   | 102  | D>N  | missense            |
| LPS22 | <i>KIAA1033</i>   | chr12 | 105508205 | G C  | 321   | 107  | E>D  | splice site         |
| LPS22 | <i>ITSN2</i>      | chr2  | 24426580  | G C  | 5009  | 1670 | R>P  | missense            |
| LPS22 | <i>ANKS3</i>      | chr16 | 4777074   | G A  | 275   | 92   | G>E  | missense            |
| LPS22 | <i>STAC2</i>      | chr17 | 37369376  | G C  | 1003  | 335  | G>R  | missense            |
| LPS22 | <i>MCM6</i>       | chr2  | 136616885 | A C  | 1348  | 450  | M>L  | missense            |
| LPS22 | <i>SLC5A3</i>     | chr21 | 35468125  | T G  | 628   | 210  | F>V  | missense            |
| LPS55 | <i>PRIM2</i>      | chr6  | 57183385  | G C  | 142   | 48   | D>H  | missense            |
| LPS55 | <i>PRIM2</i>      | chr6  | 57183289  | G A  | 46    | 16   | D>N  | missense            |
| LPS55 | <i>XIRP2</i>      | chr2  | 168106624 | C A  | 8722  | 2908 | Q>K  | missense            |
| LPS55 | <i>FANCB</i>      | chrX  | 14871193  | G A  | 1294  | 432  | G>R  | missense            |
| LPS55 | <i>PLCB4</i>      | chr20 | 9434025   | C T  | 2876  | 959  | T>M  | missense            |
| LPS55 | <i>BRCA1</i>      | chr17 | 41244253  | C T  | 32295 | 1099 | P>S  | missense            |
| LPS55 | <i>DEFB125</i>    | chr20 | 76699     | C T  | 112   | 38   | R>X  | stopgain            |
| LPS55 | <i>TRIM32</i>     | chr9  | 119461673 | C T  | 1652  | 551  | S>F  | missense            |
| LPS55 | <i>SFTPA2</i>     | chr10 | 81318642  | G T  | 292   | 98   | G>W  | splice site         |
| LPS55 | <i>ZDHHC4</i>     | chr7  | 6628405   | G A  | 899   | 300  | R>H  | missense            |
| LPS55 | <i>SCN9A</i>      | chr2  | 167151134 | delC | 940   | 314  | L>fs | frameshift deletion |
| LPS55 | <i>TEP1</i>       | chr14 | 20869301  |      |       |      |      | splice site         |
| LPS55 | <i>NHSL1</i>      | chr6  | 138754647 | A T  | 847   | 283  | I>F  | missense            |
| LPS55 | <i>PDE3A</i>      | chr12 | 20807134  | C T  | 3179  | 1060 | S>F  | missense            |
| LPS55 | <i>XPO1</i>       | chr2  | 61729141  | T A  | 398   | 133  | I>N  | missense            |
| LPS55 | <i>ZC3HC1</i>     | chr7  | 129680877 | T G  | 323   | 108  | V>G  | missense            |
| LPS80 | <i>FMR1NB</i>     | chrX  | 147084825 | T G  | 382   | 128  | F>V  | missense            |
| LPS80 | <i>TSN</i>        | chr2  | 122522834 | A G  | 578   | 193  | K>R  | missense            |
| LPS80 | <i>DOCK7</i>      | chr1  | 63099204  | C T  | 1081  | 361  | P>S  | missense            |
| LPS80 | <i>TPP2</i>       | chr13 | 103301494 | G C  | 2866  | 956  | D>H  | missense            |
| LPS80 | <i>KCNK10</i>     | chr14 | 88658663  | T C  | 758   | 253  | V>A  | missense            |
| LPS80 | <i>MCTS1</i>      | chrX  | 119740017 | G C  | 251   | 84   | R>T  | missense            |
| LPS80 | <i>CYTIP</i>      | chr2  | 158300390 | C T  | 143   | 48   | T>M  | missense            |
| LPS80 | <i>KRTAP10-11</i> | chr21 | 46066767  | G T  | 392   | 132  | S>I  | missense            |
| LPS80 | <i>ASB9</i>       | chrX  | 15268665  | C T  | 455   | 152  | S>F  | missense            |
| LPS80 | <i>FAM47C</i>     | chrX  | 37027222  | C T  | 739   | 247  | R>C  | missense            |
| LPS80 | <i>MGAM</i>       | chr7  | 141727465 | G A  | 1151  | 384  | R>H  | missense            |
| LPS80 | <i>ZNF280C</i>    | chrX  | 129370191 | G A  | 768   | 256  | M>I  | missense            |
| LPS80 | <i>HDGFRP3</i>    | chr15 | 83820013  | A G  | 560   | 187  | N>S  | missense            |
| LPS80 | <i>WDR66</i>      | chr12 | 122439498 | G A  | 3331  | 1111 | V>I  | missense            |
| LPS80 | <i>PLCB3</i>      | chr11 | 64022867  | G T  | 468   |      |      | splice site         |
| LPS80 | <i>CDH12</i>      | chr5  | 21752012  | C T  | 2219  | 740  | A>V  | missense            |
| LPS80 | <i>NDUFA9</i>     | chr12 | 4778952   | G A  | 769   | 257  | D>N  | missense            |
| LPS80 | <i>COG1</i>       | chr17 | 71193530  | C G  | 908   | 303  | P>R  | missense            |
| LPS80 | <i>B2M</i>        | chr15 | 45003745  | A G  | 1     | 1    | M>V  | missense            |
| LPS80 | <i>DNAAF1</i>     | chr16 | 84182654  | C T  | 1677  | 56   | T>I  | missense            |
| LPS80 | <i>DNAH14</i>     | chr1  | 225452889 | C T  | 7210  | 2404 | P>S  | missense            |
| LPS80 | <i>PLEC</i>       | chr8  | 144995168 | C G  | 8779  | 2927 | L>V  | missense            |
| LPS80 | <i>SEMA3G</i>     | chr3  | 52474021  | C T  | 1237  | 413  | L>F  | missense            |
| LPS80 | <i>IQGAP1</i>     | chr15 | 91026781  | A C  | 3744  | 1248 | L>F  | missense            |
| LPS80 | <i>RYSR2</i>      | chr1  | 237617829 | delC | 1431  | 477  | N>fs | frameshift deletion |
| LPS80 | <i>STARD3</i>     | chr17 | 37815053  | C T  | 572   | 191  | S>L  | missense            |

|       |                |       |           |     |        |      |     |             |
|-------|----------------|-------|-----------|-----|--------|------|-----|-------------|
| LPS80 | <i>SVIL</i>    | chr10 | 29762864  | G A | 4154   | 1385 | C>Y | missense    |
| LPS80 | <i>DNAJB3</i>  | chr2  | 234652378 | G A | 185    | 62   | R>H | missense    |
| LPS80 | <i>PPFIA2</i>  | chr12 | 81693145  | G A | 1360   | 454  | E>K | missense    |
| LPS80 | <i>SYT6</i>    | chr1  | 114680443 | C G | 745    | 249  | R>G | missense    |
| LPS80 | <i>MUC4</i>    | chr3  | 195509353 | C T | 9098   | 3033 | A>V | missense    |
| LPS80 | <i>COL2A1</i>  | chr12 | 48372514  | G A | 2554   | 852  | G>S | missense    |
| LPS80 | <i>MUC4</i>    | chr3  | 195518119 | T A | 332    | 111  | M>K | missense    |
| LPS80 | <i>FRG1</i>    | chr4  | 190876263 | A T | 389    | 130  | D>V | missense    |
| LPS80 | <i>MUC4</i>    | chr3  | 195509354 | G A | 9097   | 3033 | A>T | missense    |
| LPS86 | <i>XDH</i>     | chr2  | 31587076  | A G | 2579   | 860  | L>P | missense    |
| LPS86 | <i>RBM43</i>   | chr2  | 152107541 | G A | 953    | 318  | S>L | missense    |
| LPS86 | <i>PLXND1</i>  | chr3  | 129324372 | C T | 1111   | 371  | V>I | missense    |
| LPS86 | <i>QRFR</i>    | chr4  | 122250816 | C T | 949    | 317  | V>M | missense    |
| LPS86 | <i>DMGDH</i>   | chr5  | 78329170  | C T | 1255   | 419  | E>K | missense    |
| LPS86 | <i>SLC17A4</i> | chr6  | 25777129  | G T | 1210   | 404  | A>S | missense    |
| LPS86 | <i>CHD7</i>    | chr8  | 61654751  | C T | 760    | 254  | Q>* | stopgain    |
| LPS86 | <i>ZNF34</i>   | chr8  | 145999151 | C G | 1120   | 374  | E>Q | missense    |
| LPS86 | <i>ZNF34</i>   | chr8  | 145999235 | C G | 1036   | 346  | D>H | missense    |
| LPS86 | <i>ZNF34</i>   | chr8  | 145999270 | C G | 1001   | 334  | R>T | missense    |
| LPS86 | <i>ZIC5</i>    | chr13 | 100617887 | G A | 1736   | 579  | P>L | missense    |
| LPS86 | <i>MYH7</i>    | chr14 | 23884969  | G A | 5026   | 1676 | R>W | missense    |
| LPS86 | <i>AKAP6</i>   | chr14 | 33292249  | T G | 5230   | 1744 | S>A | missense    |
| LPS86 | <i>MAP1A</i>   | chr15 | 43814392  | G A | 1435   | 479  | V>M | missense    |
| LPS86 | <i>HERC1</i>   | chr15 | 64067071  | A G | 752    | 251  | L>P | missense    |
| LPS86 | <i>ZNF597</i>  | chr16 | 3486428   | G A | 1271   | 424  | T>M | missense    |
| LPS86 | <i>DNAH9</i>   | chr17 | 11593254  | C T | 4115   | 1372 | A>V | missense    |
| LPS86 | <i>ATPAF2</i>  | chr17 | 17921916  | T C | 817    | 273  | I>V | missense    |
| LPS86 | <i>WTIP</i>    | chr19 | 34991160  | G A | 1279   | 427  | V>I | missense    |
| LPS86 | <i>DSCR3</i>   | chr21 | 38600081  | C T | 685    | 229  | A>T | missense    |
| LPS86 | <i>DMD</i>     | chrX  | 31187650  | G T | 10463  | 3488 | P>H | missense    |
| LPS86 | <i>ARMCX4</i>  | chrX  | 100748329 | T A | 4753   | 1585 | F>I | missense    |
| LPS86 | <i>LRCH2</i>   | chrX  | 114391189 | T G | 1505   | 502  | K>T | missense    |
| LPS86 | <i>PLXNB3</i>  | chrX  | 153032985 | G A | 703    | 235  | V>I | missense    |
| LPS86 | <i>NF1</i>     | chr17 | 29664385  | G A | 6428-1 |      |     | splice site |
| LPS87 | <i>ZNF362</i>  | chr1  | 33745956  | G A | 581    | 194  | R>H | missense    |
| LPS87 | <i>SLAMF1</i>  | chr1  | 160604670 | C A | 433    | 145  | E>* | stopgain    |
| LPS87 | <i>FAM129A</i> | chr1  | 184772762 | G T | 1511   | 504  | T>K | missense    |
| LPS87 | <i>LYPD6B</i>  | chr2  | 150069590 | A C | 413    | 138  | E>A | missense    |
| LPS87 | <i>USP40</i>   | chr2  | 234418712 | T C | 2593   | 865  | T>A | missense    |
| LPS87 | <i>WDR19</i>   | chr4  | 39230232  | A G | 1904   | 635  | H>R | missense    |
| LPS87 | <i>CPEB4</i>   | chr5  | 173317104 | C A | 368    | 123  | S>Y | missense    |
| LPS87 | <i>B3GAT2</i>  | chr6  | 71603912  | G A | 655    | 219  | R>C | missense    |
| LPS87 | <i>RP1</i>     | chr8  | 55539267  | C T | 2825   | 942  | T>M | missense    |
| LPS87 | <i>RBM4</i>    | chr11 | 66433414  | C T | 500    | 167  | S>F | missense    |
| LPS87 | <i>ODZ4</i>    | chr11 | 78565191  | C T | 1639   | 547  | G>R | missense    |
| LPS87 | <i>KCNA6</i>   | chr12 | 4919736   | G A | 529    | 177  | A>T | missense    |
| LPS87 | <i>LUM</i>     | chr12 | 91502656  | G A | 101    | 34   | S>L | missense    |
| LPS87 | <i>RNF113B</i> | chr13 | 98828894  | G A | 597    | 199  | Y>X | stopgain    |
| LPS87 | <i>VWA3A</i>   | chr16 | 22137515  | G A | 1549   | 517  | D>N | missense    |
| LPS87 | <i>DNAH9</i>   | chr17 | 11666901  | G C | 7140   | 2380 | W>C | missense    |
| LPS87 | <i>LYZL6</i>   | chr17 | 34266356  | G A | 5      | 2    | T>I | missense    |
| LPS87 | <i>SLC14A2</i> | chr18 | 43258987  | G T | 2560   | 854  | V>L | missense    |
| LPS87 | <i>TIMM44</i>  | chr19 | 8002971   | G A | 253    | 85   | R>C | missense    |

|       |                  |       |           |     |       |      |     |             |
|-------|------------------|-------|-----------|-----|-------|------|-----|-------------|
| LPS87 | <i>ZNF836</i>    | chr19 | 52660018  | T A | 918   | 306  | E>D | missense    |
| LPS87 | <i>NECAB3</i>    | chr20 | 32248155  | A C | 434   | 145  | L>R | missense    |
| LPS87 | <i>IFNAR2</i>    | chr21 | 34635371  | G A | 1114  | 372  | E>K | missense    |
| LPS87 | <i>CLIC6</i>     | chr21 | 36042475  | G A | 788   | 263  | G>E | missense    |
| LPS87 | <i>CCR6</i>      | chr6  | 167549632 | G A | 9+1   |      |     | splice site |
| LPS88 | <i>RNF220</i>    | chr1  | 45088446  | C T | 791   | 264  | P>L | missense    |
| LPS88 | <i>EPS8L3</i>    | chr1  | 110293960 | C G | 1580  | 527  | R>P | missense    |
| LPS88 | <i>TRIM46</i>    | chr1  | 155152336 | G A | 1445  | 482  | R>H | missense    |
| LPS88 | <i>SFTPB</i>     | chr2  | 85892818  | G A | 529   | 177  | R>W | missense    |
| LPS88 | <i>SEL1L3</i>    | chr4  | 25792119  | C A | 2034  | 678  | M>I | missense    |
| LPS88 | <i>CCDC125</i>   | chr5  | 68606983  | T A | 412   | 138  | R>X | stopgain    |
| LPS88 | <i>N4BP3</i>     | chr5  | 177548902 | T G | 1535  | 512  | M>R | missense    |
| LPS88 | <i>ZFHX4</i>     | chr8  | 77775818  | G A | 9868  | 3290 | V>I | missense    |
| LPS88 | <i>ZFAT</i>      | chr8  | 135521897 | C T | 3421  | 1141 | A>T | missense    |
| LPS88 | <i>CRTAM</i>     | chr11 | 122726507 | C T | 595   | 199  | R>X | stopgain    |
| LPS88 | <i>INHBE</i>     | chr12 | 57849952  | G A | 374   | 125  | R>H | missense    |
| LPS88 | <i>CUX2</i>      | chr12 | 111748247 | A G | 1661  | 554  | D>G | missense    |
| LPS88 | <i>FBRSL1</i>    | chr12 | 133151016 | A G | 1696  | 566  | S>G | missense    |
| LPS88 | <i>RPS6KL1</i>   | chr14 | 75376641  | T G | 875   | 292  | E>A | missense    |
| LPS88 | <i>DISP2</i>     | chr15 | 40660483  | A T | 2170  | 724  | S>C | missense    |
| LPS88 | <i>DISP2</i>     | chr15 | 40660486  | C G | 2173  | 725  | P>A | missense    |
| LPS88 | <i>DISP2</i>     | chr15 | 40660873  | G C | 2560  | 854  | G>R | missense    |
| LPS88 | <i>DISP2</i>     | chr15 | 40660883  | T A | 2570  | 857  | L>H | missense    |
| LPS88 | <i>DISP2</i>     | chr15 | 40660891  | G C | 2578  | 860  | G>R | missense    |
| LPS88 | <i>DISP2</i>     | chr15 | 40660897  | T C | 2584  | 862  | S>P | missense    |
| LPS88 | <i>UBE2I</i>     | chr16 | 1370177   | A G | 226   | 76   | K>E | missense    |
| LPS88 | <i>RGL3</i>      | chr19 | 11527669  | G A | 212   | 71   | A>V | missense    |
| LPS88 | <i>WDR62</i>     | chr19 | 36592211  | C G | 2963  | 988  | P>R | missense    |
| LPS88 | <i>MAGEE1</i>    | chrX  | 75649198  | C T | 875   | 292  | S>L | missense    |
| LPS88 | <i>MAGEE1</i>    | chrX  | 75649512  | C T | 1189  | 397  | P>S | missense    |
| LPS88 | <i>MAGEE1</i>    | chrX  | 75649522  | C A | 1199  | 400  | P>Q | missense    |
| LPS88 | <i>CDK1</i>      | chr10 | 62545423  | C T | 196   | 66   | L>F | splice site |
| LPS88 | <i>MIER3</i>     | chr5  | 56247920  | C G | 9+1   |      |     | splice site |
| LPS88 | <i>RFNG</i>      | chr17 | 80006685  | T C | 915-2 |      |     | splice site |
| LPS89 | <i>CDK11A</i>    | chr1  | 1635511   | C T | 1659  | 553  | W>* | stopgain    |
| LPS89 | <i>DPT</i>       | chr1  | 168698228 | A G | 185   | 62   | I>T | missense    |
| LPS89 | <i>CDK18</i>     | chr1  | 205498506 | C A | 1127  | 376  | T>N | missense    |
| LPS89 | <i>POTEF</i>     | chr2  | 130832515 | T C | 2530  | 844  | T>A | missense    |
| LPS89 | <i>FN1</i>       | chr2  | 216245643 | T G | 5325  | 1775 | E>D | missense    |
| LPS89 | <i>FN1</i>       | chr2  | 216245673 | A C | 5295  | 1765 | H>Q | missense    |
| LPS89 | <i>FN1</i>       | chr2  | 216245674 | T C | 5294  | 1765 | H>R | missense    |
| LPS89 | <i>DES</i>       | chr2  | 220283491 | A G | 307   | 103  | T>A | missense    |
| LPS89 | <i>VGLL3</i>     | chr3  | 87027733  | G A | 346   | 116  | L>F | missense    |
| LPS89 | <i>VGLL3</i>     | chr3  | 87027738  | A T | 341   | 114  | I>N | missense    |
| LPS89 | <i>EIF4G1</i>    | chr3  | 184035250 | C T | 28    | 10   | P>S | missense    |
| LPS89 | <i>PRRC2A</i>    | chr6  | 31602629  | G T | 5035  | 1679 | A>S | missense    |
| LPS89 | <i>ZFAND3</i>    | chr6  | 38029473  | A G | 217   | 73   | I>V | missense    |
| LPS89 | <i>CITED2</i>    | chr6  | 139694661 | C T | 421   | 141  | A>T | missense    |
| LPS89 | <i>CITED2</i>    | chr6  | 139695028 | A G | 54    | 18   | N>N | missense    |
| LPS89 | <i>HNRNPA2B1</i> | chr7  | 26232975  | T C | 896   | 299  | N>S | missense    |
| LPS89 | <i>EXT1</i>      | chr8  | 119122409 | C A | 877   | 293  | V>L | missense    |
| LPS89 | <i>EXT1</i>      | chr8  | 119123090 | C A | 196   | 66   | V>F | missense    |
| LPS89 | <i>EXT1</i>      | chr8  | 119123142 | G A | 144   | 48   | H>H | missense    |



|       |                   |       |           |     |      |      |     |             |
|-------|-------------------|-------|-----------|-----|------|------|-----|-------------|
| LPS89 | <i>EXT1</i>       | chr8  | 119123210 | A C | 76   | 26   | L>V | missense    |
| LPS89 | <i>EIF5AL1</i>    | chr10 | 81272731  | C G | 326  | 109  | P>R | missense    |
| LPS89 | <i>ZBED5</i>      | chr11 | 10875123  | G C | 1370 | 457  | S>C | missense    |
| LPS89 | <i>NAV2</i>       | chr11 | 20066820  | T C | 3506 | 1169 | M>T | missense    |
| LPS89 | <i>SF1</i>        | chr11 | 64532974  | C T | 1804 | 602  | G>S | missense    |
| LPS89 | <i>CFL1</i>       | chr11 | 65623512  | C T | 154  | 52   | A>T | missense    |
| LPS89 | <i>CRYAB</i>      | chr11 | 111779508 | T C | 307  | 103  | T>A | missense    |
| LPS89 | <i>DAZAP2</i>     | chr12 | 51636352  | G C | 540  | 180  | L>F | missense    |
| LPS89 | <i>SIX1</i>       | chr14 | 61113150  | C T | 187  | 63   | G>S | missense    |
| LPS89 | <i>ACTN1</i>      | chr14 | 69347592  | C A | 2068 | 690  | G>C | missense    |
| LPS89 | <i>SERF2</i>      | chr15 | 44085973  | T C | 316  | 106  | F>L | missense    |
| LPS89 | <i>SERF2</i>      | chr15 | 44086004  | T C | 347  | 116  | F>S | missense    |
| LPS89 | <i>SERF2</i>      | chr15 | 44086034  | C T | 377  | 126  | T>M | missense    |
| LPS89 | <i>SERF2</i>      | chr15 | 44086040  | C A | 383  | 128  | A>E | missense    |
| LPS89 | <i>SERF2</i>      | chr15 | 44086046  | C T | 389  | 130  | P>L | missense    |
| LPS89 | <i>SERF2</i>      | chr15 | 44086162  | C T | 505  | 169  | R>W | missense    |
| LPS89 | <i>TUBB3</i>      | chr16 | 90001818  | G C | 2000 | 667  | R>P | missense    |
| LPS89 | <i>TUBB3</i>      | chr16 | 90001863  | G A | 2045 | 682  | S>N | missense    |
| LPS89 | <i>RTN4RL1</i>    | chr17 | 1841070   | C A | 46   | 16   | A>S | missense    |
| LPS89 | <i>PFN1</i>       | chr17 | 4851661   | T C | 29   | 10   | N>S | missense    |
| LPS89 | <i>NR1D1,THRA</i> | chr17 | 38249442  | A G | 1739 | 580  | L>S | missense    |
| LPS89 | <i>MSL1</i>       | chr17 | 38285619  | T A | 1114 | 372  | L>I | missense    |
| LPS89 | <i>COL1A1</i>     | chr17 | 48272622  | C T | 1270 | 424  | G>S | missense    |
| LPS89 | <i>COL1A1</i>     | chr17 | 48278834  | G C | 41   | 14   | A>G | missense    |
| LPS89 | <i>DDX5</i>       | chr17 | 62496142  | G C | 1744 | 582  | P>A | missense    |
| LPS89 | <i>TIMP2</i>      | chr17 | 76851867  | T C | 545  | 182  | N>S | missense    |
| LPS89 | <i>ACTG1</i>      | chr17 | 79479066  | C T | 226  | 76   | V>I | missense    |
| LPS89 | <i>JUNB</i>       | chr19 | 12903522  | A G | 937  | 313  | T>A | missense    |
| LPS89 | <i>ACTN4</i>      | chr19 | 39216461  | A G | 2108 | 703  | N>S | missense    |
| LPS89 | <i>ZNF526</i>     | chr19 | 42729027  | C T | 472  | 158  | H>Y | missense    |
| LPS89 | <i>MYH9</i>       | chr22 | 36708183  | T C | 1639 | 547  | M>V | missense    |
| LPS89 | <i>H1FO</i>       | chr22 | 38201955  | C G | 404  | 135  | T>S | missense    |
| LPS89 | <i>SLC35A2</i>    | chrX  | 48762228  | C G | 958  | 320  | V>L | missense    |
| LPS89 | <i>MAGED1</i>     | chrX  | 51644764  | C A | 2243 | 748  | T>N | missense    |
| LPS89 | <i>MSN</i>        | chrX  | 64958927  | G T | 1440 | 480  | Q>H | missense    |
| LPS89 | <i>FHL1</i>       | chrX  | 135290664 | T G | 600  | 200  | D>E | missense    |
| LPS89 | <i>TUBA1B</i>     | chr12 | 49523175  | T G |      |      |     | splice site |
| LPS90 | <i>EPHB2</i>      | chr1  | 23234569  | G A | 2260 | 754  | V>I | missense    |
| LPS90 | <i>OBSCN</i>      | chr1  | 228404205 | C G | 2179 | 727  | L>V | missense    |
| LPS90 | <i>TFCP2L1</i>    | chr2  | 121995220 | G A | 982  | 328  | R>W | missense    |
| LPS90 | <i>TWF2</i>       | chr3  | 52263763  | T A | 377  | 126  | H>L | missense    |
| LPS90 | <i>PARP15</i>     | chr3  | 122340429 | C T | 824  | 275  | T>I | missense    |
| LPS90 | <i>CPEB2</i>      | chr4  | 15005408  | G A | 1111 | 371  | A>T | missense    |
| LPS90 | <i>SCD5</i>       | chr4  | 83626456  | C T | 343  | 115  | A>T | missense    |
| LPS90 | <i>ELFN1</i>      | chr7  | 1786659   | C G | 2427 | 809  | D>E | missense    |
| LPS90 | <i>PCLO</i>       | chr7  | 82580755  | C T | 9149 | 3050 | R>Q | missense    |
| LPS90 | <i>UBR5</i>       | chr8  | 103305986 | G C | 4418 | 1473 | A>G | missense    |
| LPS90 | <i>OR52B4</i>     | chr11 | 4389065   | C A | 461  | 154  | S>I | missense    |
| LPS90 | <i>PTGDR2</i>     | chr11 | 61503043  | C T | 440  | 147  | A>V | missense    |
| LPS90 | <i>DAGLA</i>      | chr12 | 9847451   | A T | 1139 | 380  | T>M | missense    |
| LPS90 | <i>CLEC2D</i>     | chr12 | 49227113  | C T | 557  | 186  | K>I | missense    |
| LPS90 | <i>DDX23</i>      | chr12 | 49227116  | C T | 1750 | 584  | D>N | missense    |
| LPS90 | <i>DDX23</i>      | chr12 | 49418470  | G A | 1747 | 583  | E>K | missense    |

|       |                |       |           |     |       |      |       |          |
|-------|----------------|-------|-----------|-----|-------|------|-------|----------|
| LPS90 | <i>MLL2</i>    | chr12 | 49420064  | G/A | 15943 | 5315 | Q>*   | stopgain |
| LPS90 | <i>MLL2</i>    | chr12 | 57865027  | C/T | 15685 | 5229 | R>C   | missense |
| LPS90 | <i>GLI1</i>    | chr12 | 58025065  | C/T | 2504  | 835  | A>V   | missense |
| LPS90 | <i>PITPNM2</i> | chr14 | 105609195 | C/A | 1634  | 545  | S>F   | missense |
| LPS90 | <i>JAG2</i>    | chr15 | 28377338  | G/A | 3554  | 1185 | R>L   | missense |
| LPS90 | <i>HERC2</i>   | chr16 | 336886    | G/A | 12478 | 4160 | L>F   | missense |
| LPS90 | <i>PDIA2</i>   | chr16 | 31392245  | G/T | 1474  | 492  | D>N   | missense |
| LPS90 | <i>ITGAX</i>   | chr19 | 39001336  | C/A | 3304  | 1102 | V>F   | missense |
| LPS90 | <i>RYR1</i>    | chr19 | 54544231  | G/A | 9037  | 3013 | H>N   | missense |
| LPS90 | <i>VSTM1</i>   | chr22 | 45127612  | C/A | 695   | 232  | A>V   | missense |
| LPS90 | <i>PRR5</i>    | chr22 | 50845269  | A/T | 394   | 132  | Q132K | missense |

|                                           |
|-------------------------------------------|
| False call validated by Sanger sequencing |
|-------------------------------------------|

|                                          |
|------------------------------------------|
| True call validated by Sanger Sequencing |
|------------------------------------------|

**Supplementary Table S6: List of genes for targeted capture in Prevalence cohort study**

| <b>Gene symbol</b> | <b>Gene symbol</b> | <b>Gene symbol</b> | <b>Gene symbol</b> | <b>Gene symbol</b> |
|--------------------|--------------------|--------------------|--------------------|--------------------|
| 53BP1              | COG5               | FMR1NB             | NRAS               | ST8SIA3            |
| ABCC3              | COL2A1             | FOLR2              | OR2A14             | STAC2              |
| ADAMTS4            | CPM                | FRG1               | OR5M3              | STARD3             |
| ADAMTSL3           | CSMD2              | GLI1               | OR6B1              | STAT1              |
| ADH6               | CSMD3              | GOLIM4             | OR8H2              | STAT3              |
| AGAP2              | CYP2C19            | GPR109A            | OTOP3              | STAT5              |
| AKT                | CYTIP              | HDAC1              | PADI2              | STAT6              |
| ANKS3              | DARS2              | HDGFRP3            | PARP1              | STOX1              |
| AP-1               | DAZAP2             | HEG1               | PCDH15             | STXBP3             |
| AP-1               | DEFB125            | HEPHL1             | PDE1C              | SVIL               |
| AP-1               | DEFB136            | HER2               | PDE3A              | SYT6               |
| APC                | DLG2               | HER3               | PGF                | TECTB              |
| APC                | DLG2               | HOXA5              | PI3K               | TEL2               |
| ARAF               | DLG4               | HSD17B2            | PI3K               | TEL2               |
| ASAM               | DNAAF1             | HTR1F              | PI3K               | TEP1               |
| ASB9               | DNAH14             | INTS2              | PKC                | TEP1               |
| ATF1               | DNAH17             | INTS6              | PLBD1              | THSD7A             |
| ATF1               | DNAJB3             | IQGAP1             | PLCB3              | TP53               |
| ATM                | DNAJC14            | IRF2               | PLCB4              | TP53TG5            |
| ATR                | DOCK4              | ITSN2              | PLEC               | TPP2               |
| ATR                | DOCK7              | KCNK10             | PLIN2              | TRIM32             |
| ATR                | DOPEY1             | KDM5B              | POLE               | TSN                |
| ATR                | DPP6               | KIAA1033           | PPARG              | TSR2               |
| B2M                | DRGX               | KIT                | PPFIA2             | TTI1               |
| BRAF               | DST                | KRAS               | PPP2R1B            | TTI2               |
| BRCA1              | E2F1               | KRTAP10-11         | PRKD3              | UBQLNL             |
| BRCA2              | EBF3               | LEP                | PTEN               | USP34              |
| BTBD7              | EBF3               | LIPE               | PTPN9              | USP48              |
| C4ORF41            | EGF                | LPL                | PTPRD              | VEGFA              |
| C6ORF138           | EGFR               | LPL                | PUM1               | VEGFB              |
| CACNA1D            | EI24               | LY75               | RAD51              | VEPH1              |
| CADM1              | ERBB4              | MAGEB6             | RAF                | WDR66              |
| CADM2              | ERCC1              | MAPKAP1            | RB                 | WDR96              |
| CAMKK2             | ERCC4              | MCM6               | RCBTB1             | WDSUB1             |
| CCDC93             | ERCC5              | MCTS1              | RNF182             | WFS1               |
| CDH1               | ERK1               | MDC1               | RNF32              | XIRP2              |
| CDH1               | ERK2               | MGAM               | ROBO1              | XRCC1              |
| CDH11              | ERK3               | MGAT3              | ROS1               | ZBTB16             |
| CDH12              | ERK3               | MGAT3              | RPUSD2             | ZBTB38             |
| CDKN2A             | ERK3               | MIA2               | RYR2               | ZDHHC4             |
| CDKN2B             | ERK5               | MTDH               | SACS               | ZMYM4              |
| CEBPA              | FAM47C             | MTOR               | SEC63              | ZNF135             |
| CEBPB              | FANCA              | MUC12              | SEMA3A             | ZNF169             |

|              |  |               |  |                |  |                |  |                |
|--------------|--|---------------|--|----------------|--|----------------|--|----------------|
| <i>CFD</i>   |  | <i>FANCB</i>  |  | <i>MUC4</i>    |  | <i>SEMA3G</i>  |  | <i>ZNF280C</i> |
| <i>CFD</i>   |  | <i>FANCB</i>  |  | <i>MXRA5</i>   |  | <i>SEZ6L</i>   |  | <i>ZNF611</i>  |
| <i>CGNL1</i> |  | <i>FANCD2</i> |  | <i>MYH3</i>    |  | <i>SLC5A3</i>  |  | <i>ZNF75D</i>  |
| <i>CHD6</i>  |  | <i>FAT3</i>   |  | <i>MYO3A</i>   |  | <i>SLITRK2</i> |  |                |
| <i>CHEK1</i> |  | <i>FCAMR</i>  |  | <i>NDUFA9</i>  |  | <i>SOX5</i>    |  |                |
| <i>CHEK2</i> |  | <i>FER1L6</i> |  | <i>NEUROD4</i> |  | <i>SPHKAP</i>  |  |                |
| <i>COG1</i>  |  | <i>FLT1</i>   |  | <i>NF1</i>     |  | <i>SPOCK3</i>  |  |                |

**Supplementary Table S7. Coverage analysis of targeted exome sequencing of LPS patients and LPS cell lines in Prevalence cohort**

| Sample ID | Sample type | Bait set                    | Genome size | Bait size | Mean target coverage | Target coverage >20x |
|-----------|-------------|-----------------------------|-------------|-----------|----------------------|----------------------|
| LPS1      | Tumor       | SureSelect customized beads | 3095693983  | 2027742   | 106                  | 90%                  |
| LPS11     | Germline    | SureSelect customized beads | 3095693983  | 2027742   | 113                  | 86%                  |
| LPS11     | Tumor       | SureSelect customized beads | 3095693983  | 2027742   | 113                  | 86%                  |
| LPS12     | Germline    | SureSelect customized beads | 3095693983  | 2027742   | 75                   | 67%                  |
| LPS12     | Tumor       | SureSelect customized beads | 3095693983  | 2027742   | 141                  | 82%                  |
| LPS14     | Tumor       | SureSelect customized beads | 3095693983  | 2027742   | 156                  | 91%                  |
| LPS15     | Tumor       | SureSelect customized beads | 3095693983  | 2027742   | 163                  | 90%                  |
| LPS16     | Tumor       | SureSelect customized beads | 3095693983  | 2027742   | 89                   | 78%                  |
| LPS19     | Germline    | SureSelect customized beads | 3095693983  | 2027742   | 143                  | 94%                  |
| LPS19     | Tumor       | SureSelect customized beads | 3095693983  | 2027742   | 48                   | 53%                  |
| LPS2      | Tumor       | SureSelect customized beads | 3095693983  | 2027742   | 111                  | 87%                  |
| LPS20     | Tumor       | SureSelect customized beads | 3095693983  | 2027742   | 104                  | 78%                  |
| LPS21     | Tumor       | SureSelect customized beads | 3095693983  | 2027742   | 248                  | 97%                  |
| LPS22     | Germline    | SureSelect customized beads | 3095693983  | 2027742   | 147                  | 94%                  |
| LPS22     | Tumor       | SureSelect customized beads | 3095693983  | 2027742   | 87                   | 60%                  |
| LPS23     | Tumor       | SureSelect customized beads | 3095693983  | 2027742   | 124                  | 86%                  |
| LPS24     | Tumor       | SureSelect customized beads | 3095693983  | 2027742   | 228                  | 96%                  |
| LPS25     | Tumor       | SureSelect customized beads | 3095693983  | 2027742   | 31                   | 38%                  |
| LPS26     | Tumor       | SureSelect customized beads | 3095693983  | 2027742   | 105                  | 88%                  |
| LPS27     | Tumor       | SureSelect customized beads | 3095693983  | 2027742   | 60                   | 55%                  |
| LPS28     | Tumor       | SureSelect customized beads | 3095693983  | 2027742   | 63                   | 69%                  |
| LPS29     | Tumor       | SureSelect customized beads | 3095693983  | 2027742   | 130                  | 86%                  |
| LPS3      | Tumor       | SureSelect customized beads | 3095693983  | 2027742   | 134                  | 92%                  |
| LPS30     | Tumor       | SureSelect customized beads | 3095693983  | 2027742   | 77                   | 64%                  |
| LPS31     | Tumor       | SureSelect customized beads | 3095693983  | 2027742   | 45                   | 50%                  |
| LPS32     | Tumor       | SureSelect customized beads | 3095693983  | 2027742   | 24                   | 31%                  |
| LPS33     | Tumor       | SureSelect customized beads | 3095693983  | 2027742   | 87                   | 78%                  |
| LPS34     | Tumor       | SureSelect customized beads | 3095693983  | 2027742   | 30                   | 40%                  |
| LPS35     | Tumor       | SureSelect customized beads | 3095693983  | 2027742   | 86                   | 84%                  |
| LPS36     | Tumor       | SureSelect customized beads | 3095693983  | 2027742   | 20                   | 26%                  |
| LPS37     | Tumor       | SureSelect customized beads | 3095693983  | 2027742   | 304                  | 95%                  |
| LPS38     | Tumor       | SureSelect customized beads | 3095693983  | 2027742   | 119                  | 89%                  |
| LPS39     | Tumor       | SureSelect customized beads | 3095693983  | 2027742   | 52                   | 59%                  |
| LPS4      | Tumor       | SureSelect customized beads | 3095693983  | 2027742   | 59                   | 71%                  |
| LPS40     | Tumor       | SureSelect customized beads | 3095693983  | 2027742   | 161                  | 91%                  |
| LPS41     | Tumor       | SureSelect customized beads | 3095693983  | 2027742   | 141                  | 93%                  |
| LPS42     | Tumor       | SureSelect customized beads | 3095693983  | 2027742   | 107                  | 91%                  |
| LPS43     | Tumor       | SureSelect customized beads | 3095693983  | 2027742   | 151                  | 95%                  |
| LPS44     | Tumor       | SureSelect customized beads | 3095693983  | 2027742   | 167                  | 94%                  |
| LPS45     | Tumor       | SureSelect customized beads | 3095693983  | 2027742   | 118                  | 85%                  |
| LPS46     | Tumor       | SureSelect customized beads | 3095693983  | 2027742   | 145                  | 89%                  |
| LPS47     | Tumor       | SureSelect customized beads | 3095693983  | 2027742   | 93                   | 82%                  |
| LPS48     | Tumor       | SureSelect customized beads | 3095693983  | 2027742   | 84                   | 76%                  |
| LPS49     | Tumor       | SureSelect customized beads | 3095693983  | 2027742   | 149                  | 89%                  |
| LPS5      | Tumor       | SureSelect customized beads | 3095693983  | 2027742   | 104                  | 90%                  |
| LPS50     | Tumor       | SureSelect customized beads | 3095693983  | 2027742   | 126                  | 85%                  |
| LPS51     | Tumor       | SureSelect customized beads | 3095693983  | 2027742   | 69                   | 73%                  |
| LPS52     | Tumor       | SureSelect customized beads | 3095693983  | 2027742   | 101                  | 82%                  |
| LPS53     | Tumor       | SureSelect customized beads | 3095693983  | 2027742   | 200                  | 92%                  |
| LPS54     | Tumor       | SureSelect customized beads | 3095693983  | 2027742   | 11                   | 4%                   |
| LPS55     | Germline    | SureSelect customized beads | 3095693983  | 2027742   | 132                  | 92%                  |
| LPS55     | Tumor       | SureSelect customized beads | 3095693983  | 2027742   | 104                  | 80%                  |
| LPS57     | Tumor       | SureSelect customized beads | 3095693983  | 2027742   | 14                   | 10%                  |
| LPS58     | Tumor       | SureSelect customized beads | 3095693983  | 2027742   | 27                   | 44%                  |
| LPS59     | Germline    | SureSelect customized beads | 3095693983  | 2027742   | 111                  | 87%                  |
| LPS59     | Tumor       | SureSelect customized beads | 3095693983  | 2027742   | 26                   | 34%                  |
| LPS6      | Tumor       | SureSelect customized beads | 3095693983  | 2027742   | 197                  | 94%                  |
| LPS61     | Tumor       | SureSelect customized beads | 3095693983  | 2027742   | 20                   | 20%                  |

|           |           |                             |            |         |      |     |
|-----------|-----------|-----------------------------|------------|---------|------|-----|
| LPS62     | Tumor     | SureSelect customized beads | 3095693983 | 2027742 | 45   | 54% |
| LPS63     | Tumor     | SureSelect customized beads | 3095693983 | 2027742 | 116  | 84% |
| LPS64     | Tumor     | SureSelect customized beads | 3095693983 | 2027742 | 118  | 83% |
| LPS65     | Tumor     | SureSelect customized beads | 3095693983 | 2027742 | 93   | 85% |
| LPS66     | Tumor     | SureSelect customized beads | 3095693983 | 2027742 | 56   | 71% |
| LPS67     | Germline  | SureSelect customized beads | 3095693983 | 2027742 | 196  | 94% |
| LPS67     | Tumor     | SureSelect customized beads | 3095693983 | 2027742 | 66   | 87% |
| LPS68     | Tumor     | SureSelect customized beads | 3095693983 | 2027742 | 111  | 85% |
| LPS69     | Tumor     | SureSelect customized beads | 3095693983 | 2027742 | 141  | 91% |
| LPS7      | Tumor     | SureSelect customized beads | 3095693983 | 2027742 | 101  | 89% |
| LPS70     | Tumor     | SureSelect customized beads | 3095693983 | 2027742 | 114  | 88% |
| LPS71     | Tumor     | SureSelect customized beads | 3095693983 | 2027742 | 149  | 94% |
| LPS72     | Tumor     | SureSelect customized beads | 3095693983 | 2027742 | 184  | 96% |
| LPS73     | Tumor     | SureSelect customized beads | 3095693983 | 2027742 | 117  | 94% |
| LPS74     | Tumor     | SureSelect customized beads | 3095693983 | 2027742 | 210  | 95% |
| LPS75     | Tumor     | SureSelect customized beads | 3095693983 | 2027742 | 54   | 64% |
| LPS76     | Tumor     | SureSelect customized beads | 3095693983 | 2027742 | 33   | 50% |
| LPS77     | Tumor     | SureSelect customized beads | 3095693983 | 2027742 | 117  | 91% |
| LPS78     | Tumor     | SureSelect customized beads | 3095693983 | 2027742 | 92   | 85% |
| LPS79     | Tumor     | SureSelect customized beads | 3095693983 | 2027742 | 80   | 77% |
| LPS8      | Tumor     | SureSelect customized beads | 3095693983 | 2027742 | 61   | 73% |
| LPS80     | Tumor     | SureSelect customized beads | 3095693983 | 2027742 | 195  | 94% |
| LPS80     | Germline  | SureSelect customized beads | 3095693983 | 2027742 | 174  | 95% |
| LPS81     | Tumor     | SureSelect customized beads | 3095693983 | 2027742 | 88   | 84% |
| LPS82     | Tumor     | SureSelect customized beads | 3095693983 | 2027742 | 127  | 95% |
| LPS83     | Tumor     | SureSelect customized beads | 3095693983 | 2027742 | 187  | 93% |
| LPS84     | Tumor     | SureSelect customized beads | 3095693983 | 2027742 | 191  | 95% |
| LPS85     | Tumor     | SureSelect customized beads | 3095693983 | 2027742 | 196  | 94% |
| LPS86     | Tumor     | SureSelect customized beads | 3095693983 | 2027742 | 230  | 95% |
| LPS86     | Germline  | SureSelect customized beads | 3095693983 | 2027742 | 208  | 96% |
| LPS87     | Tumor     | SureSelect customized beads | 3095693983 | 2027742 | 252  | 95% |
| LPS87     | Germline  | SureSelect customized beads | 3095693983 | 2027742 | 162  | 94% |
| LPS88     | Germline  | SureSelect customized beads | 3095693983 | 2027742 | 226  | 96% |
| LPS88     | Tumor     | SureSelect customized beads | 3095693983 | 2027742 | 139  | 92% |
| LPS89     | Tumor     | SureSelect customized beads | 3095693983 | 2027742 | 281  | 96% |
| LPS89     | Germline  | SureSelect customized beads | 3095693983 | 2027742 | 140  | 92% |
| LPS9      | Tumor     | SureSelect customized beads | 3095693983 | 2027742 | 103  | 77% |
| LPS90     | Tumor     | SureSelect customized beads | 3095693983 | 2027742 | 273  | 96% |
| LPS90     | Germline  | SureSelect customized beads | 3095693983 | 2027742 | 173  | 94% |
| LPS91-T1  | Tumor     | SureSelect customized beads | 3095693983 | 2027742 | 1246 | 98% |
| LPS91-T2  | Tumor     | SureSelect customized beads | 3095693983 | 2027742 | 1045 | 98% |
| LPS91-T3  | Tumor     | SureSelect customized beads | 3095693983 | 2027742 | 1032 | 98% |
| LPS91     | Germline  | SureSelect customized beads | 3095693983 | 2027742 | 833  | 97% |
| LPS141    | Cell Line | SureSelect customized beads | 3095693983 | 2027742 | 224  | 94% |
| LP6       | Cell Line | SureSelect customized beads | 3095693983 | 2027742 | 178  | 93% |
| SW872     | Cell Line | SureSelect customized beads | 3095693983 | 2027742 | 166  | 93% |
| LP1       | Cell Line | SureSelect customized beads | 3095693983 | 2027742 | 135  | 86% |
| LP2       | Cell Line | SureSelect customized beads | 3095693983 | 2027742 | 437  | 94% |
| LP3       | Cell Line | SureSelect customized beads | 3095693983 | 2027742 | 491  | 95% |
| SA-4      | Cell Line | SureSelect customized beads | 3095693983 | 2027742 | 710  | 96% |
| MLS-402   | Cell Line | SureSelect customized beads | 3095693983 | 2027742 | 783  | 97% |
| GOT-3     | Cell Line | SureSelect customized beads | 3095693983 | 2027742 | 1010 | 97% |
| FU-DDLS-1 | Cell Line | SureSelect customized beads | 3095693983 | 2027742 | 175  | 88% |
| LiSa-2    | Cell Line | SureSelect customized beads | 3095693983 | 2027742 | 298  | 93% |
| T1000     | Cell Line | SureSelect customized beads | 3095693983 | 2027742 | 351  | 93% |
| T1778     | Cell Line | SureSelect customized beads | 3095693983 | 2027742 | 641  | 96% |

## Supplementary Table S8. Summary of mutations in the LPS Prevalence Cohort and LPS cell lines

### LPS patients

| Sample ID | Gene Symbol    | Chromosome | Genomic position | Nucleotide change (reference variant) | cDNA position | Amino acid position | Amino acid change | Mutation type          |
|-----------|----------------|------------|------------------|---------------------------------------|---------------|---------------------|-------------------|------------------------|
| LPS1      | <i>ADAMTS4</i> | chr1       | 161163466        | C T                                   | 1699          | 567                 | R>C               | missense               |
| LPS1      | <i>MUC4</i>    | chr3       | 195489792        | G C                                   | 1417          | 473                 | D>H               | missense               |
| LPS1      | <i>MUC4</i>    | chr3       | 195507790        | C T                                   | 10661         | 3554                | P>L               | missense               |
| LPS1      | <i>MUC4</i>    | chr3       | 195516350        | G A                                   | 2101          | 701                 | G>R               | missense               |
| LPS1      | <i>MUC4</i>    | chr3       | 195509423        | G A                                   | 9028          | 3010                | P>S               | missense               |
| LPS1      | <i>MUC4</i>    | chr3       | 195511217        | C T                                   | 7234          | 2412                | G>S               | missense               |
| LPS1      | <i>MUC4</i>    | chr3       | 195511889        | C T                                   | 6562          | 2188                | G>S               | missense               |
| LPS1      | <i>MUC4</i>    | chr3       | 195511985        | C T                                   | 6466          | 2156                | G>S               | missense               |
| LPS1      | <i>MUC4</i>    | chr3       | 195507424        | C G                                   | 11027         | 3676                | G>A               | missense               |
| LPS1      | <i>MUC4</i>    | chr3       | 195510785        | C T                                   | 7666          | 2556                | G>S               | missense               |
| LPS1      | <i>MUC4</i>    | chr3       | 195508111        | G A                                   | 10340         | 3447                | S>F               | missense               |
| LPS1      | <i>MUC4</i>    | chr3       | 195508324        | C T                                   | 10127         | 3376                | R>H               | missense               |
| LPS1      | <i>DST</i>     | chr6       | 56462690         | A T                                   | 4174          | 1392                | L>F               | missense               |
| LPS1      | <i>MUC12</i>   | chr7       | 100635210        | T C                                   | 1366          | 456                 | S>P               | missense               |
| LPS1      | <i>CSMD3</i>   | chr8       | 113988320        | C G                                   | 1088          | 363                 | T>S               | missense               |
| LPS1      | <i>HEPHL1</i>  | chr11      | 93806252         | C T                                   | 1294          | 432                 | R>W               | missense               |
| LPS1      | <i>CGNL1</i>   | chr15      | 57809168         | C T                                   | 2594          | 865                 | T>M               | missense               |
| LPS1      | <i>DNAAF1</i>  | chr16      | 84203737         | G A                                   | 1301          | 435                 | D>N               | missense               |
| LPS1      | <i>PLCB4</i>   | chr20      | 9424868          | C A                                   | 2822          | 941                 | S>Y               | missense               |
| LPS2      | <i>PIKFYVE</i> | chr2       | 209190458        | G A                                   | 2932          | 975                 | V>I               | missense               |
| LPS2      | <i>MUC4</i>    | chr3       | 195516350        | G A                                   | 2101          | 701                 | G>R               | missense               |
| LPS2      | <i>LPL</i>     | chr8       | 19809344         | A C                                   | 314           | 105                 | D>A               | missense               |
| LPS2      | <i>CSMD3</i>   | chr8       | 113299353        | T C                                   | 9271          | 3091                | S>P               | missense               |
| LPS2      | <i>UBQLNL</i>  | chr11      | 5536386          | T C                                   | 1286          | 429                 | M>T               | missense               |
| LPS2      | <i>ATM</i>     | chr11      | 108201015        | G A                                   | 7382          | 2461                | R>H               | missense               |
| LPS2      | <i>POLE</i>    | chr12      | 133226360        | G A                                   | 3698          | 1233                | R>Q               | missense               |
| LPS2      | <i>MAPK6</i>   | chr15      | 52339208         | A G                                   | 551           | 184                 | H>R               | missense               |
| LPS2      | <i>FANCA</i>   | chr16      | 89805600         | G T                                   | 4108          | 1370                | A>S               | missense               |
| LPS2      | <i>NF1</i>     | chr17      | 29653037         | A G                                   | 5035          | 1679                | I>V               | missense               |
| LPS2      | <i>STARD3</i>  | chr17      | 37818557         | G A                                   | 1139          | 380                 | R>H               | missense               |
| LPS2      | <i>ABCC3</i>   | chr17      | 48753731         | C T                                   | 3160          | 1054                | R>C               | missense               |
| LPS2      | <i>PPP2R1B</i> | chr11      | 111624198        | AGA □                                 | 750_752       | 250_251             | del               | nonframeshift deletion |
| LPS2      | <i>SOX5</i>    | chr12      | 23757462         | T A                                   | 1023          | 341                 | L>F               | missense               |
| LPS2      | <i>AGAP2</i>   | chr12      | 58120773         | G A                                   | 2252          | 751                 | T>M               | missense               |
| LPS2      | <i>IQGAP1</i>  | chr15      | 90972822         | C T                                   | 314           | 105                 | A>V               | missense               |
| LPS2      | <i>STARD3</i>  | chr17      | 37815324         | GAA -                                 | 613_615       | 205_205             | del               | nonframeshift deletion |
| LPS2      | <i>STARD3</i>  | chr17      | 37815326         | A T                                   | 615           | 205                 | E>D               | missense               |
| LPS2      | <i>STARD3</i>  | chr17      | 37815328         | A T                                   | 617           | 206                 | E>V               | missense               |
| LPS2      | <i>STARD3</i>  | chr17      | 37815329         | A T                                   | 618           | 206                 | E>D               | missense               |
| LPS3      | <i>MUC4</i>    | chr3       | 195513169        | T C                                   | 5282          | 1761                | L>P               | missense               |
| LPS3      | <i>FRG1</i>    | chr4       | 190876263        | A T                                   | 389           | 130                 | D>V               | missense               |
| LPS3      | <i>PCDH15</i>  | chr10      | 55892652         | G A                                   | 1900          | 634                 | V>I               | missense               |
| LPS3      | <i>HEPHL1</i>  | chr11      | 93806252         | C T                                   | 1294          | 432                 | R>W               | missense               |
| LPS3      | <i>SACS</i>    | chr13      | 23928845         | C T                                   | 1906          | 636                 | R>W               | missense               |
| LPS3      | <i>TP53BP1</i> | chr15      | 43748962         | C T                                   | 1844          | 615                 | T>M               | missense               |
| LPS3      | <i>TP53BP1</i> | chr15      | 43784487         | G T                                   | 187           | 63                  | V>L               | missense               |
| LPS3      | <i>DNAAF1</i>  | chr16      | 84203737         | G A                                   | 1303          | 435                 | D>N               | missense               |
| LPS3      | <i>FANCA</i>   | chr16      | 89865593         | C G                                   | 874           | 292                 | H>D               | missense               |
| LPS3      | <i>INTS2</i>   | chr17      | 60002371         | C T                                   | 407           | 136                 | P>L               | missense               |
| LPS3      | <i>PCDH15</i>  | chr10      | 55892652         | C T                                   | 1789          | 597                 | V>I               | missense               |
| LPS3      | <i>SACS</i>    | chr13      | 23906592         | G A                                   | 11423         | 3808                | P>L               | missense               |
| LPS3      | <i>FAT3</i>    | chr11      | 92087318         | C A                                   | 2040          | 680                 | S>R               | missense               |

|      |                 |       |           |       |           |          |          |                        |
|------|-----------------|-------|-----------|-------|-----------|----------|----------|------------------------|
| LPS3 | <i>MUC4</i>     | chr3  | 195509423 | G/A   | 9028      | 3010     | P>S      | missense               |
| LPS3 | <i>ADAMTSL3</i> | chr15 | 84506946  | T/G   | 706       | 236      | S>A      | missense               |
| LPS3 | <i>MXRA5</i>    | chrX  | 3240529   | G/A   | 3197      | 1066     | T>I      | missense               |
| LPS3 | <i>KIT</i>      | chr4  | 55602911  | C/T   | 2621      | 874      | P>L      | missense               |
| LPS3 | <i>EGF</i>      | chr4  | 110920885 | G/C   | 2933      | 978      | W>S      | missense               |
| LPS3 | <i>EGFR</i>     | chr7  | 55225397  | C/T   | 1249      | 417      | L>F      | missense               |
| LPS3 | <i>MUC4</i>     | chr3  | 195508324 | C/T   | 10127     | 3376     | R>H      | missense               |
| LPS3 | <i>ZNF280C</i>  | chrX  | 129377604 | G/A   | 314       | 105      | S>L      | missense               |
| LPS3 | <i>NF1</i>      | chr17 | 29553477  | C     | 2026_2027 | 676      | T>fs     | frameshift insertion   |
| LPS4 | <i>APC</i>      | chr5  | 112174509 | C/T   | 3164      | 1055     | T>I      | missense               |
| LPS4 | <i>APC</i>      | chr5  | 112178555 | A/T   | 7210      | 2404     | T>S      | missense               |
| LPS4 | <i>MOGAT3</i>   | chr7  | 100839291 | A/T   | 962       | 321      | Q>L      | missense               |
| LPS4 | <i>MXRA5</i>    | chrX  | 3248104   | G/A   | 664       | 222      | D>N      | missense               |
| LPS4 | <i>AKT1</i>     | chr14 | 105239269 | G/A   | 1118      | 373      | G>D      | missense               |
| LPS4 | <i>TP53BP1</i>  | chr15 | 43748426  | G/A   | 2380      | 794      | D>N      | missense               |
| LPS4 | <i>DNAAF1</i>   | chr16 | 84193330  | C/A   | 792       | 264      | Y>X      | stopgain               |
| LPS4 | <i>CHD6</i>     | chr20 | 40068692  | T/A   | 3955      | 1319     | S>T      | missense               |
| LPS4 | <i>DOCK4</i>    | chr7  | 111644135 | C/G   | 89        | 30       | G>A      | missense               |
| LPS4 | <i>COL2A1</i>   | chr12 | 48378375  | G/T   | 1634      | 545      | P>H      | missense               |
| LPS5 | <i>XIRP2</i>    | chr2  | 168106976 | C/T   | 8404      | 2803     | S>F      | missense               |
| LPS5 | <i>MUC4</i>     | chr3  | 195498671 | A/C   | 233       | 78       | Q>P      | missense               |
| LPS5 | <i>MUC4</i>     | chr3  | 195510914 | C/G   | 7537      | 2513     | L>V      | missense               |
| LPS5 | <i>CDH12</i>    | chr5  | 21975353  | T/C   | 373       | 125      | Y>H      | missense               |
| LPS5 | <i>MXRA5</i>    | chrX  | 3228382   | C/T   | 7862      | 2621     | A>V      | missense               |
| LPS5 | <i>MXRA5</i>    | chrX  | 3240898   | G/A   | 2828      | 943      | G>D      | missense               |
| LPS5 | <i>FAT3</i>     | chr11 | 92257962  | T/C   | 3455      | 1152     | I>T      | missense               |
| LPS5 | <i>MUC12</i>    | chr7  | 100643362 | C/G   | 9518      | 3173     | T>R      | missense               |
| LPS5 | <i>STAT6</i>    | chr12 | 57500533  | C/T   | 91        | 31       | V>I      | missense               |
| LPS5 | <i>GLI1</i>     | chr12 | 57861822  | G/A   | 739       | 247      | D>N      | missense               |
| LPS5 | <i>MYH3</i>     | chr17 | 10547954  | G/A   | 1207      | 403      | P>S      | missense               |
| LPS5 | <i>TTI1</i>     | chr20 | 36642026  | G/C   | 193       | 65       | P>A      | missense               |
| LPS6 | <i>PIK3CD</i>   | chr1  | 9775972   | T/A   | 436       | 146      | F>I      | missense               |
| LPS6 | <i>MUC4</i>     | chr3  | 195506159 | C/G   | 12292     | 4098     | P>A      | missense               |
| LPS6 | <i>MUC12</i>    | chr7  | 100634887 | G/A   | 1043      | 348      | R>H      | missense               |
| LPS6 | <i>MUC12</i>    | chr7  | 100638976 | A/G   | 5132      | 1711     | E>G      | missense               |
| LPS6 | <i>SVIL</i>     | chr10 | 29773588  | C/G   | 3674      | 1225     | P>R      | missense               |
| LPS6 | <i>GLI1</i>     | chr12 | 57863433  | C/T   | 1528      | 510      | R>W      | missense               |
| LPS6 | <i>TP53BP1</i>  | chr15 | 43739624  | G/A   | 2776      | 926      | A>T      | missense               |
| LPS6 | <i>DNAAF1</i>   | chr16 | 84199444  | C/G   | 919       | 307      | Q>E      | missense               |
| LPS6 | <i>HEPPL1</i>   | chr11 | 93822135  | G/T   |           | splicing | splicing | splicing               |
| LPS6 | <i>XIRP2</i>    | chr2  | 168100497 | G -   | 1929      | 643      | E>fs     | frameshift deletion    |
| LPS7 | <i>PIKFYVE</i>  | chr2  | 209190458 | G/A   | 2923      | 975      | V>I      | missense               |
| LPS7 | <i>MUC4</i>     | chr3  | 195516350 | G/A   | 2101      | 701      | G>R      | missense               |
| LPS7 | <i>LPL</i>      | chr8  | 19809344  | A/C   | 314       | 105      | D>A      | missense               |
| LPS7 | <i>CSMD3</i>    | chr8  | 113299353 | T/C   | 9271      | 3091     | S>P      | missense               |
| LPS7 | <i>MXRA5</i>    | chrX  | 3238612   | A/G   | 5114      | 1705     | N>S      | missense               |
| LPS7 | <i>UBQLNL</i>   | chr11 | 5536386   | T/C   | 1286      | 429      | M>T      | missense               |
| LPS7 | <i>ATM</i>      | chr11 | 108201015 | G/A   | 7382      | 2461     | R>H      | missense               |
| LPS7 | <i>MAPK6</i>    | chr15 | 52339208  | A/G   | 551       | 184      | H>R      | missense               |
| LPS7 | <i>FANCA</i>    | chr16 | 89805600  | G/T   | 4108      | 1370     | A>S      | missense               |
| LPS7 | <i>NF1</i>      | chr17 | 29653037  | A/G   | 5035      | 1679     | I>V      | missense               |
| LPS7 | <i>STARD3</i>   | chr17 | 37818557  | G/A   | 1139      | 380      | R>H      | missense               |
| LPS7 | <i>ABCC3</i>    | chr17 | 48746804  | G/A   | 2156      | 719      | R>H      | missense               |
| LPS7 | <i>ABCC3</i>    | chr17 | 48753731  | C/T   | 3160      | 1054     | R>C      | missense               |
| LPS7 | <i>ZBTB38</i>   | chr3  | 141161560 | A -   | 330       | 110      | A>fs     | frameshift deletion    |
| LPS7 | <i>PPP2R1B</i>  | chr11 | 111624198 | AGA - | 750_752   | 250_251  | del      | nonframeshift deletion |
| LPS7 | <i>STARD3</i>   | chr17 | 37815324  | GAA - | 613_615   | 205_205  | del      | nonframeshift deletion |
| LPS7 | <i>CACNA1D</i>  | chr3  | 53778823  | T/C   | 2975      | 992      | L>P      | missense               |
| LPS7 | <i>ZBTB38</i>   | chr3  | 141161558 | G/A   | 328       | 110      | A>T      | missense               |
| LPS7 | <i>ZBTB38</i>   | chr3  | 141161565 | A/G   | 335       | 112      | K>R      | missense               |
| LPS7 | <i>RNF182</i>   | chr6  | 13977472  | A/T   | 122       | 41       | H>L      | missense               |
| LPS7 | <i>PLCB3</i>    | chr11 | 64029920  | G/T   | 1879      | 627      | G>W      | missense               |



|       |          |       |           |     |           |         |           |                      |
|-------|----------|-------|-----------|-----|-----------|---------|-----------|----------------------|
| LPS7  | STARD3   | chr17 | 37815326  | A T | 615       | 205     | E>D       | missense             |
| LPS7  | STARD3   | chr17 | 37815328  | A T | 617       | 206     | E>V       | missense             |
| LPS7  | ZNF280C  | chrX  | 129349808 | G A | 1795      | 599     | R>C       | missense             |
| LPS8  | USP34    | chr2  | 61447507  | A G | 7985      | 2662    | Q>R       | missense             |
| LPS8  | MUC4     | chr3  | 195508228 | C G | 10223     | 3408    | P>R       | missense             |
| LPS8  | MUC4     | chr3  | 195508300 | C T | 10151     | 53384   | S>L       | missense             |
| LPS8  | MUC12    | chr7  | 100636285 | C T | 2441      | 814     | T>I       | missense             |
| LPS8  | ANKS3    | chr16 | 4777017   | G T | 332       | 5111    | S>I       | missense             |
| LPS8  | MUC12    | chr7  | 100635082 | A T | 1238      | 413     | H>L       | missense             |
| LPS8  | MUC12    | chr7  | 100645780 | C T | 11936     | 3979    | A>V       | missense             |
| LPS8  | FLT1     | chr13 | 28886138  | C A | 3484      | 1162    | V>L       | missense             |
| LPS8  | ANKS3    | chr16 | 4777017   | C A | 332       | 111     | S>I       | missense             |
| LPS9  | KDM5B    | chr1  | 202698950 | G A | 4382      | 1461    | R>H       | missense             |
| LPS9  | XIRP2    | chr2  | 168106631 | T C | 8063      | 2688    | F>S       | missense             |
| LPS9  | MUC4     | chr3  | 195506060 | G C | 12391     | 4131    | V>L       | missense             |
| LPS9  | MUC4     | chr3  | 195506303 | C A | 12148     | 4050    | P>T       | missense             |
| LPS9  | MUC4     | chr3  | 195508453 | G A | 9998      | 3333    | S>N       | missense             |
| LPS9  | MUC4     | chr3  | 195510073 | C T | 8378      | 2793    | A>V       | missense             |
| LPS9  | MUC4     | chr3  | 195510107 | G A | 8344      | 2782    | A>T       | missense             |
| LPS9  | MUC4     | chr3  | 195512480 | T C | 5971      | 1991    | S>P       | missense             |
| LPS9  | PLEC     | chr8  | 145009036 | G A | 899       | 300     | R>Q       | missense             |
| LPS9  | ZNF75D   | chrX  | 134421668 | C T | 649       | 217     | Q>X       | missense             |
| LPS9  | TP53     | chr17 | 7579698   |     |           |         |           |                      |
| LPS11 | PADI2    | chr1  | 17409049  | C A | 1149      | 383     | K>N       | missense             |
| LPS11 | WDR96    | chr10 | 105923977 | C T | 3121      | 1041    | V>M       | missense             |
| LPS11 | FOLR2    | chr11 | 71932639  | G - | 601       | 201     | G>fs      | frameshift deletion  |
| LPS11 | PLBD1    | chr12 | 14706266  | C T | 196       | 66      | A>T       | missense             |
| LPS11 | DNAJC14  | chr12 | 56221343  | G C | 1100      | 367     | S>C       | missense             |
| LPS11 | MYH3     | chr17 | 10552985  | C T | 551       | 184     | G>E       | missense             |
| LPS11 | INTS2    | chr17 | 59955334  | G C | 2394      | 798     | S>R       | missense             |
| LPS11 | DNAH17   | chr17 | 76497874  | T G | 5272      | 1758    | T>P       | missense             |
| LPS11 | SPHKAP   | chr2  | 228890137 | A T | 414       | 138     | N>K       | missense             |
| LPS11 | ZBTB38   | chr3  | 141164779 | G T | 3549      | 1183    | K>N       | missense             |
| LPS11 | MDC1     | chr6  | 30673497  | C G | 3463      | 1155    | V>L       | missense             |
| LPS11 | MUC12    | chr7  | 100647851 | C G | 14007     | 4669    | H>Q       | missense             |
| LPS11 | OR6B1    | chr7  | 143701831 | A G | 742       | 248     | I>V       | missense             |
| LPS11 | PRKD3    | chr2  | 37543624  | A C | 44        | 15      | L>X       | stopgain SNV         |
| LPS11 | STXBP3   | chr1  | 109350028 | G A | 1541      | 514     | R>H       | missense             |
| LPS11 | VEPH1    | chr3  | 157178123 | T - | 376       | 126     | M>fs      | frameshift deletion  |
| LPS11 | OTOP3    | chr17 | 72937649  | C T | 235       | 79      | R>W       | missense             |
| LPS11 | EBF3     | chr10 | 131676052 | G C | 616       | 206     | R>G       | missense             |
| LPS11 | MXRA5    | chrX  | 3242785   | G A | 941       | 314     | P>L       | missense             |
| LPS11 | FRG1     | chr4  | 190878646 | G T | 526       | 176     | E>X       | stopgain SNV         |
| LPS11 | DOCK4    | chr7  | 111508192 | A   | 2128_2129 | 710_711 | K>delinsX | stopgain SNV         |
| LPS11 | ERCC4    | chr16 | 14038581  | A   | 1906_1907 | 636     | E>fs      | frameshift insertion |
| LPS11 | INTS6    | chr13 | 51957533  | C A | 1112      | 371     | S>I       | missense             |
| LPS11 | EGF      | chr4  | 110895945 | C A | 1685      | 562     | A>D       | missense             |
| LPS11 | BRCA2    | chr13 | 32913920  | G C | 5428      | 1810    | V>L       | missense             |
| LPS11 | USP34    | chr2  | 61510584  | T A | 4833      | 1611    | R>S       | missense             |
| LPS11 | DST      | chr6  | 56392316  | G A | 10028     | 3343    | A>V       | missense             |
| LPS11 | KDM5B    | chr1  | 202704682 | C T | 3298      | 1100    | G>R       | missense             |
| LPS11 | FOLR2    | chr11 | 71932290  | G T | 410       | 137     | W>L       | missense             |
| LPS11 | TP53BP1  | chr15 | 43762174  | T G | 1271      | 424     | N>T       | missense             |
| LPS14 | DOCK7    | chr1  | 63084396  | G A | 1663      | 555     | V>I       | missense             |
| LPS14 | APC      | chr5  | 112175363 | G A | 4018      | 1340    | A>T       | missense             |
| LPS14 | CYP2C18  | chr10 | 96447920  | C T | 370       | 124     | R>W       | missense             |
| LPS14 | OR8H2    | chr11 | 55872943  | T C | 425       | 142     | L>P       | missense             |
| LPS14 | POLE     | chr12 | 133254193 | C T | 691       | 231     | R>C       | missense             |
| LPS14 | MAPK6    | chr15 | 52339069  | C T | 412       | 138     | R>W       | missense             |
| LPS14 | ADAMTSL3 | chr15 | 84651057  | G A | 2677      | 893     | E>K       | missense             |
| LPS14 | HDAC10   | chr22 | 50687800  | G A | 647       | 216     | R>Q       | missense             |
| LPS15 | CSMD2    | chr1  | 34034977  | C T | 8134      | 2712    | L>F       | missense             |
| LPS15 | RYR2     | chr1  | 237619982 | G T | 1559      | 520     | R>L       | missense             |

|       |               |       |           |     |       |      |     |          |
|-------|---------------|-------|-----------|-----|-------|------|-----|----------|
| LPS15 | <i>MUC4</i>   | chr3  | 195508078 | CIT | 10373 | 3458 | P>L | missense |
| LPS15 | <i>MUC4</i>   | chr3  | 195508111 | CIT | 10340 | 3447 | S>F | missense |
| LPS15 | <i>MUC4</i>   | chr3  | 195508307 | AIG | 10144 | 3382 | I>V | missense |
| LPS15 | <i>MUC4</i>   | chr3  | 195509737 | TJC | 8714  | 2905 | V>A | missense |
| LPS15 | <i>MUC4</i>   | chr3  | 195513539 | GJC | 4912  | 1638 | A>P | missense |
| LPS15 | <i>MUC4</i>   | chr3  | 195513541 | AIG | 4910  | 1637 | N>S | missense |
| LPS15 | <i>MUC4</i>   | chr3  | 195513806 | CIT | 4645  | 1549 | D>H | missense |
| LPS15 | <i>MUC4</i>   | chr3  | 195513817 | CIT | 4634  | 1545 | A>V | missense |
| LPS15 | <i>MUC4</i>   | chr3  | 195515510 | TJG | 2941  | 981  | Y>D | missense |
| LPS15 | <i>FRG1</i>   | chr4  | 190876263 | AJT | 389   | 130  | D>V | missense |
| LPS15 | <i>DST</i>    | chr6  | 56499300  | GJA | 1843  | 615  | V>I | missense |
| LPS15 | <i>SEMA3A</i> | chr7  | 83634712  | GJA | 1301  | 435  | V>I | missense |
| LPS15 | <i>MGAM</i>   | chr7  | 141752757 | CJG | 3132  | 1044 | Y>X | missense |
| LPS15 | <i>MGAM</i>   | chr7  | 141763311 | CJA | 4270  | 1424 | P>T | missense |
| LPS15 | <i>MTDH</i>   | chr8  | 98731338  | GJA | 1442  | 481  | R>H | missense |
| LPS15 | <i>MXRA5</i>  | chrX  | 3229345   | GJA | 6899  | 2300 | R>H | missense |
| LPS15 | <i>DLG2</i>   | chr11 | 83641521  | CIT | 1148  | 383  | P>L | missense |
| LPS15 | <i>FAT3</i>   | chr11 | 92086828  | TJC | 1550  | 517  | L>S | missense |
| LPS15 | <i>STAT6</i>  | chr12 | 57499995  | GJA | 659   | 220  | S>N | missense |
| LPS15 | <i>RPUSD2</i> | chr15 | 40866186  | AJC | 1364  | 455  | E>A | missense |
| LPS15 | <i>DNAAF1</i> | chr16 | 84203737  | GJA | 1303  | 435  | D>N | missense |
| LPS15 | <i>MYH3</i>   | chr17 | 10541497  | GJA | 3592  | 1198 | A>T | missense |
| LPS15 | <i>DNAH17</i> | chr17 | 76437187  | AJG | 11623 | 3875 | I>V | missense |
| LPS15 | <i>CHD6</i>   | chr20 | 40049450  | AJT | 5825  | 1942 | H>L | missense |
| LPS16 | <i>DARS2</i>  | chr1  | 173826791 | AJG | 1886  | 629  | Y>C | missense |
| LPS16 | <i>MUC4</i>   | chr3  | 195508867 | CIT | 9584  | 3195 | T>I | missense |
| LPS16 | <i>MUC4</i>   | chr3  | 195515297 | GJC | 3154  | 1052 | G>R | missense |
| LPS16 | <i>GDNF</i>   | chr5  | 37816042  | GJA | 398   | 133  | R>Q | missense |
| LPS16 | <i>MGAM</i>   | chr7  | 141752215 | AJC | 2927  | 976  | E>A | missense |
| LPS16 | <i>ZNF169</i> | chr9  | 97063449  | TJA | 1609  | 537  | S>T | missense |
| LPS16 | <i>MXRA5</i>  | chrX  | 3261745   | CIT | 130   | 44   | R>X | stopgain |
| LPS16 | <i>OR8H2</i>  | chr11 | 55872943  | TJC | 425   | 142  | L>P | missense |
| LPS16 | <i>FAT3</i>   | chr11 | 92620184  | CIT | 12956 | 4319 | P>L | missense |
| LPS20 | <i>ROBO1</i>  | chr3  | 78663873  | GIT | 4060  | 1354 | V>L | missense |
| LPS20 | <i>MUC4</i>   | chr3  | 195507221 | CIT | 11230 | 3744 | P>S | missense |
| LPS20 | <i>MUC4</i>   | chr3  | 195508226 | CJG | 10225 | 3409 | L>V | missense |
| LPS20 | <i>MUC4</i>   | chr3  | 195508228 | CJG | 10223 | 3408 | P>R | missense |
| LPS20 | <i>MUC4</i>   | chr3  | 195508777 | TJC | 9672  | 3225 | V>A | missense |
| LPS20 | <i>MUC4</i>   | chr3  | 195508786 | TJC | 9665  | 3222 | L>P | missense |
| LPS20 | <i>MUC4</i>   | chr3  | 195508787 | CJA | 9664  | 3222 | L>I | missense |
| LPS20 | <i>SPOCK3</i> | chr4  | 168155233 | GJA | 92    | 31   | G>E | missense |
| LPS20 | <i>MUC12</i>  | chr7  | 100634145 | GJA | 301   | 101  | A>T | missense |
| LPS20 | <i>PLEC</i>   | chr8  | 145007513 | CIT | 1282  | 428  | R>W | missense |
| LPS20 | <i>MYO3A</i>  | chr10 | 26482160  | AJG | 4465  | 1489 | I>V | missense |
| LPS20 | <i>SVIL</i>   | chr10 | 29777566  | GJA | 3034  | 1012 | V>M | missense |
| LPS20 | <i>PLCB3</i>  | chr11 | 64027666  | AJC | 1691  | 564  | E>A | missense |
| LPS20 | <i>POLE</i>   | chr12 | 133226017 | CIT | 3880  | 1294 | R>C | missense |
| LPS20 | <i>CGNL1</i>  | chr15 | 57731293  | CIT | 1096  | 366  | L>F | missense |
| LPS21 | <i>DNAH14</i> | chr1  | 225380461 | GJC | 5668  | 180  | E>Q | missense |
| LPS21 | <i>ROBO1</i>  | chr3  | 78663873  | GIT | 4060  | 1354 | V>L | missense |
| LPS21 | <i>PIK3CA</i> | chr3  | 178937447 | GJA | 1835  | 612  | R>Q | missense |
| LPS21 | <i>MUC4</i>   | chr3  | 195508385 | GIT | 10066 | 3356 | G>C | missense |
| LPS21 | <i>MUC4</i>   | chr3  | 195508786 | TJC | 9665  | 3222 | L>P | missense |
| LPS21 | <i>MUC4</i>   | chr3  | 195508787 | CJA | 9664  | 3222 | L>I | missense |
| LPS21 | <i>MUC4</i>   | chr3  | 195512761 | CJA | 5690  | 1897 | A>E | missense |
| LPS21 | <i>OR8H2</i>  | chr11 | 55872943  | TJC | 425   | 142  | L>P | missense |
| LPS21 | <i>PDE3A</i>  | chr12 | 20782958  | AJG | 691   | 231  | T>A | missense |
| LPS21 | <i>AKT1</i>   | chr14 | 105246551 | GJA | 49    | 17   | E>K | missense |
| LPS21 | <i>LLGL1</i>  | chr17 | 18145527  | CIT | 2930  | 977  | P>L | missense |
| LPS21 | <i>ABCC3</i>  | chr17 | 48753391  | AJG | 3007  | 1003 | S>G | missense |
| LPS21 | <i>LIPE</i>   | chr19 | 42930480  | CJG | 829   | 274  | Y>X | stopgain |
| LPS21 | <i>HDAC10</i> | chr22 | 50687800  | GJA | 647   | 216  | R>Q | missense |
| LPS21 | <i>MUC4</i>   | chr3  | 195509423 | GJA | 9028  | 3010 | P>S | missense |
| LPS22 | <i>STOX1</i>  | chr10 | 70645656  | GIT | 2104  | 702  | D>Y | missense |
| LPS22 | <i>OR5M3</i>  | chr11 | 56237775  | CJA | 199   | 67   | V>F | missense |
| LPS22 | <i>FAT3</i>   | chr11 | 92532456  | GJA | 6277  | 2093 | V>I | missense |

|       |                 |       |           |               |           |           |      |                        |
|-------|-----------------|-------|-----------|---------------|-----------|-----------|------|------------------------|
| LPS22 | <i>MIA2</i>     | chr14 | 39716604  | C T           | 826       | 276       | H>Y  | missense               |
| LPS22 | <i>ANKS3</i>    | chr16 | 4777074   | C T           | 275       | 92        | G>E  | missense               |
| LPS22 | <i>STAC2</i>    | chr17 | 37369376  | C G           | 1003      | 335       | G>R  | missense               |
| LPS22 | <i>ST8SIA3</i>  | chr18 | 55024338  | G A           | 497       | 166       | G>E  | missense               |
| LPS22 | <i>ZNF135</i>   | chr19 | 58578553  | G A           | 737       | 246       | R>Q  | missense               |
| LPS22 | <i>PIK3CA</i>   | chr3  | 178952072 | A G           | 3127      | 1043      | M>V  | missense               |
| LPS22 | <i>DEFB136</i>  | chr8  | 11831558  | A T           | 125       | 42        | F>Y  | missense               |
| LPS22 | <i>ITSN2</i>    | chr2  | 24426580  | C G           | 4928      | 1643      | R>P  | missense               |
| LPS22 | <i>HEG1</i>     | chr3  | 124728625 | C T           | 3117      | 1039      | M>I  | missense               |
| LPS22 | <i>FAT3</i>     | chr11 | 92531611  | TT -          | 5432_5433 | 1811_1811 | >del | frameshift deletion    |
| LPS22 | <i>STOX1</i>    | chr10 | 70644696  | A             | 1144_1145 | 382       | Q>fs | frameshift insertion   |
| LPS22 | <i>SPOCK3</i>   | chr4  | 167921546 | C T           | 37        | 13        | D>N  | missense               |
| LPS22 | <i>ITSN2</i>    | chr2  | 24533386  | C A           | 528       | 176       | Q>6H | missense               |
| LPS22 | <i>EGFR</i>     | chr7  | 55273243  | G A           | 3566      | 1189      | G>D  | missense               |
| LPS22 | <i>TRIM32</i>   | chr9  | 119460427 | C A           | 406       | 136       | L>I  | missense               |
| LPS22 | <i>XRCC1</i>    | chr19 | 44057791  | G             | 459_460   | 153       | P>fs | frameshift insertion   |
| LPS22 | <i>HEPHL1</i>   | chr11 | 93754648  | G T           | 114       | 38        | W>C  | missense               |
| LPS22 | <i>STAT6</i>    | chr12 | 57490894  | G             | 1852_1853 | 618       | S>fs | frameshift insertion   |
| LPS22 | <i>MUC4</i>     | chr3  | 195512434 | GTGTCG -      | 6012_6017 | 2004_2006 | >del | nonframeshift deletion |
| LPS22 | <i>FAT3</i>     | chr11 | 92533398  | C             | 7219_7220 | 2407      | A>fs | frameshift insertion   |
| LPS22 | <i>MUC12</i>    | chr7  | 100638976 | A T           | 5132      | 1711      | E>V  | missense               |
| LPS22 | <i>STAT5A</i>   | chr17 | 40453398  | C             | 1095_1096 | 365       | N>fs | frameshift insertion   |
| LPS22 | <i>SPHKAP</i>   | chr2  | 229046289 | A G           | 26        | 9         | V>A  | missense               |
| LPS23 | <i>XIRP2</i>    | chr2  | 168103916 | G T           | 5348      | 1783      | C>F  | missense               |
| LPS23 | <i>MUC4</i>     | chr3  | 195506740 | C G           | 11711     | 3904      | P>R  | missense               |
| LPS23 | <i>CDH12</i>    | chr5  | 22078635  | C A           | 151       | 51        | R>S  | missense               |
| LPS23 | <i>PLEC</i>     | chr8  | 145001637 | A G           | 3709      | 1237      | I>V  | missense               |
| LPS23 | <i>PLIN2</i>    | chr9  | 19126124  | C G           | 214       | 72        | L>V  | missense               |
| LPS23 | <i>OR8H2</i>    | chr11 | 55872943  | T C           | 425       | 142       | L>P  | missense               |
| LPS23 | <i>ADAMTSL3</i> | chr15 | 84561467  | G C           | 1294      | 432       | V>L  | missense               |
| LPS23 | <i>OTOP3</i>    | chr17 | 72942840  | G A           | 890       | 297       | S>N  | missense               |
| LPS23 | <i>ZNF135</i>   | chr19 | 58579679  | C A           | 1863      | 621       | H>Q  | missense               |
| LPS23 | <i>CHEK2</i>    | chr22 | 29090026  | G T           | 1455      | 485       | W>C  | missense               |
| LPS23 | <i>DLG4</i>     | chr17 | 7096376   | G A           | 1745      | 582       | S>F  | missense               |
| LPS23 | <i>CHD6</i>     | chr20 | 40162053  | C G           | 190       | 64        | A>P  | missense               |
| LPS23 | <i>CHD6</i>     | chr20 | 40162055  | G A           | 188       | 63        | T>I  | missense               |
| LPS23 | <i>MAGEB6</i>   | chrX  | 26212887  | G A           | 924       | 308       | W>X  | stopgain SNV           |
| LPS23 | <i>MGAM</i>     | chr7  | 141752153 | C A           | 2865      | 955       | S>R  | missense               |
| LPS23 | <i>PLEC</i>     | chr8  | 145001637 | T C           | 3655      | 1219      | I>V  | missense               |
| LPS23 | <i>FAT3</i>     | chr11 | 92087262  | G A           | 1984      | 662       | A>T  | missense               |
| LPS24 | <i>PIK3CD</i>   | chr1  | 9776589   | C T           | 692       | 231       | P>L  | missense               |
| LPS24 | <i>CSMD2</i>    | chr1  | 34631386  | C A           | 29        | 10        | P>H  | missense               |
| LPS24 | <i>KDM5B</i>    | chr1  | 202702626 | C T           | 3812      | 1271      | S>L  | missense               |
| LPS24 | <i>XIRP2</i>    | chr2  | 168114435 | C T           | 1478      | 493       | S>F  | missense               |
| LPS24 | <i>SEMA3G</i>   | chr3  | 52469941  | C A           | 2027      | 676       | A>D  | missense               |
| LPS24 | <i>MUC4</i>     | chr3  | 195508211 | C A           | 10240     | 3414      | P>T  | missense               |
| LPS24 | <i>MUC4</i>     | chr3  | 195510131 | A C           | 8320      | 2774      | T>P  | missense               |
| LPS24 | <i>MUC4</i>     | chr3  | 195510146 | C G           | 8305      | 2769      | L>V  | missense               |
| LPS24 | <i>PLCB3</i>    | chr11 | 64034960  | G A           | 3637      | 1213      | A>T  | missense               |
| LPS24 | <i>TELO2</i>    | chr16 | 1545589   | T C           | 578       | 193       | V>A  | missense               |
| LPS24 | <i>DNAAF1</i>   | chr16 | 84203737  | G A           | 1303      | 435       | D>N  | missense               |
| LPS24 | <i>ERBB2</i>    | chr17 | 37871547  | C A           | 1067      | 356       | A>D  | missense               |
| LPS24 | <i>ABCC3</i>    | chr17 | 48753065  | G A           | 2788      | 930       | E>K  | missense               |
| LPS24 | <i>ROS1</i>     | chr6  | 117638307 | G T           | 6134      | 2045      | T>K  | missense               |
| LPS24 | <i>USP48</i>    | chr1  | 22050420  | C A           | 1619      | 540       | S>I  | missense               |
| LPS24 | <i>PDE1C</i>    | chr7  | 31867950  | G A           | 1241      | 414       | P>L  | missense               |
| LPS24 | <i>STXBP3</i>   | chr1  | 109350042 | G T           | 555       | 519       | A>S  | missense               |
| LPS24 | <i>XIRP2</i>    | chr2  | 168114435 | C T           | 713       | 238       | S>F  | missense               |
| LPS24 | <i>ERCC4</i>    | chr16 | 14041971  | G A           | 2518      | 840       | E>K  | missense               |
| LPS24 | <i>TP53</i>     | chr17 | 7576849   | GTACCTGAAGG - | 591_597   | 197_199   | del  | frameshift             |

|       |                 |       |           |       |           |           |          |                        |
|-------|-----------------|-------|-----------|-------|-----------|-----------|----------|------------------------|
| LPS25 | <i>SPHKAP</i>   | chr2  | 228884010 | A T   | 1560      | 520       | K>N      | deletion               |
| LPS25 | <i>MUC4</i>     | chr3  | 195509771 | G A   | 8680      | 2894      | A>T      | missense               |
| LPS25 | <i>MUC4</i>     | chr3  | 195512549 | T C   | 5920      | 1968      | S>P      | missense               |
| LPS25 | <i>FRG1</i>     | chr4  | 190876263 | A T   | 389       | 130       | D>V      | missense               |
| LPS25 | <i>CSMD3</i>    | chr8  | 113318376 | T A   | 7931      | 2644      | L>Q      | missense               |
| LPS25 | <i>ZHX2</i>     | chr8  | 123964783 | A G   | 1033      | 345       | I>V      | missense               |
| LPS25 | <i>WDR96</i>    | chr10 | 105912391 | G A   | 3634      | 1212      | V>M      | missense               |
| LPS25 | <i>EBF3</i>     | chr10 | 131639180 | G A   | 1462      | 488       | A>T      | missense               |
| LPS25 | <i>FAT3</i>     | chr11 | 92086345  | G A   | 1067      | 356       | C>Y      | missense               |
| LPS25 | <i>FAT3</i>     | chr11 | 92577553  | C T   | 11020     | 3674      | R>W      | missense               |
| LPS25 | <i>ZNF135</i>   | chr19 | 58579719  | C T   | 1903      | 635       | Q>X      | stopgain               |
| LPS25 | <i>PCDH15</i>   | chr10 | 56423952  | C A   | 71        | 24        | C>F      | missense               |
| LPS25 | <i>ATM</i>      | chr11 | 108100002 | C A   | 283       | 95        | Q>K      | missense               |
| LPS26 | <i>HEG1</i>     | chr3  | 124738297 | C T   | 1397      | 466       | S>F      | missense               |
| LPS26 | <i>KCNMB3</i>   | chr3  | 178957810 | A G   | 496       | 166       | T>A      | missense               |
| LPS26 | <i>SVIL</i>     | chr10 | 29779914  | G A   | 2776      | 926       | V>I      | missense               |
| LPS26 | <i>BRCA1</i>    | chr17 | 41226387  | G A   | 1324      | 442       | D>N      | missense               |
| LPS26 | <i>DNAH17</i>   | chr17 | 76421626  | T G   | 12942     | 4314      | F>L      | missense               |
| LPS27 | <i>MUC4</i>     | chr3  | 195510844 | C T   | 7607      | 2536      | S>L      | missense               |
| LPS27 | <i>MUC4</i>     | chr3  | 195515123 | A G   | 3328      | 1110      | T>A      | missense               |
| LPS27 | <i>FRG1</i>     | chr4  | 190876263 | A T   | 389       | 130       | D>V      | missense               |
| LPS27 | <i>MUC12</i>    | chr7  | 100635229 | T G   | 1385      | 462       | V>G      | missense               |
| LPS27 | <i>CSMD3</i>    | chr8  | 113299353 | T C   | 9271      | 3091      | S>P      | missense               |
| LPS27 | <i>MYO3A</i>    | chr10 | 26462901  | G A   | 3708      | 1236      | M>I      | missense               |
| LPS27 | <i>PPP2R1B</i>  | chr11 | 111625809 | G A   | 472       | 158       | A>T      | missense               |
| LPS27 | <i>TP53</i>     | chr17 | 7579902   | C T   | 11        | 4         | P>L      | missense               |
| LPS27 | <i>NF1</i>      | chr17 | 29556214  | G C   | 2581      | 861       | A>P      | missense               |
| LPS27 | <i>DNAH17</i>   | chr17 | 76481728  | G A   | 7387      | 2463      | V>M      | missense               |
| LPS27 | <i>GLI1</i>     | chr12 | 57865315  | G     | 2408_2409 | 803       | L>       | frameshift insertion   |
| LPS27 | <i>STAT5A</i>   | chr17 | 40462642  | C     | 2340_2341 | 780       | S>fs     | frameshift insertion   |
| LPS27 | <i>EGF</i>      | chr4  | 110884455 | G A   |           | splicing  | splicing | splicing               |
| LPS27 | <i>MUC12</i>    | chr7  | 100635048 | A T   | 1204      | 402       | S>C      | missense               |
| LPS27 | <i>KIAA1033</i> | chr12 | 105521028 | G T   | 1160      | 387       | R>M      | missense               |
| LPS27 | <i>CDH1</i>     | chr16 | 68863597  | G A   | 2336      | 779       | R>Q      | missense               |
| LPS27 | <i>RYR2</i>     | chr1  | 237753227 | A G   | 3733      | 1245      | R>G      | missense               |
| LPS27 | <i>DNAH17</i>   | chr17 | 76492074  | G A   | 5786      | 1929      | A>V      | missense               |
| LPS28 | <i>PROC</i>     | chr2  | 128186155 | C T   | 1019      | 340       | T>M      | missense               |
| LPS28 | <i>ROBO1</i>    | chr3  | 79639046  | G A   | 16        | 6         | V>I      | missense               |
| LPS28 | <i>MUC4</i>     | chr3  | 195511804 | C T   | 6647      | 2216      | S>L      | missense               |
| LPS28 | <i>MUC4</i>     | chr3  | 195512215 | C A   | 6236      | 2079      | T>N      | missense               |
| LPS28 | <i>MUC4</i>     | chr3  | 195512501 | C T   | 5950      | 1984      | P>S      | missense               |
| LPS28 | <i>WDR66</i>    | chr12 | 122399909 | A G   | 2333      | 778       | Y>C      | missense               |
| LPS28 | <i>CHEK2</i>    | chr22 | 29083914  | C T   | 1603      | 535       | R>C      | missense               |
| LPS28 | <i>PARP1</i>    | chr1  | 226579913 | T C   | 389       | E130      | E>G      | missense               |
| LPS28 | <i>DAZAP2</i>   | chr12 | 51636349  | G C   | 537       | 179       | M>I      | missense               |
| LPS28 | <i>DAZAP2</i>   | chr12 | 51636350  | T A   | 538       | 180       | L>M      | missense               |
| LPS28 | <i>DAZAP2</i>   | chr12 | 51636354  | T G   | 542       | 181       | L>W      | missense               |
| LPS29 | <i>VEPH1</i>    | chr3  | 157081338 | A G   | 1550      | 517       | D>G      | missense               |
| LPS29 | <i>MUC4</i>     | chr3  | 195506740 | C G   | 11711     | 3904      | P>R      | missense               |
| LPS29 | <i>MGAM</i>     | chr7  | 141750579 | C T   | 2720      | 907       | T>M      | missense               |
| LPS29 | <i>WDR66</i>    | chr12 | 122404930 | G A   | 2562      | 854       | M>I      | missense               |
| LPS29 | <i>DNAH17</i>   | chr17 | 76482395  | G A   | 7012      | 2338      | V>M      | missense               |
| LPS29 | <i>PCDH15</i>   | chr10 | 55581883  | GTT - | 5481_5483 | 1827_1828 | del      | nonframeshift deletion |
| LPS29 | <i>RCBTB1</i>   | chr13 | 50141292  | C A   | 124       | 42        | E>X      | stopgain SNV           |
| LPS30 | <i>MUC4</i>     | chr3  | 195506060 | G C   | 12391     | 4131      | V>L      | missense               |
| LPS30 | <i>MUC4</i>     | chr3  | 195506101 | A T   | 12350     | 4117      | D>V      | missense               |
| LPS30 | <i>MUC4</i>     | chr3  | 195506102 | G A   | 12349     | 4117      | D>N      | missense               |
| LPS30 | <i>MUC4</i>     | chr3  | 195506303 | C A   | 12148     | 4050      | P>T      | missense               |
| LPS30 | <i>MUC4</i>     | chr3  | 195506558 | C G   | 11893     | 3965      | H>D      | missense               |
| LPS30 | <i>MUC4</i>     | chr3  | 195506581 | A G   | 11870     | 3957      | D>G      | missense               |
| LPS30 | <i>MUC4</i>     | chr3  | 195507241 | C T   | 11210     | 3737      | A>V      | missense               |
| LPS30 | <i>MUC4</i>     | chr3  | 195508490 | G T   | 9961      | 3321      | A>S      | missense               |



|       |                |       |           |     |           |          |          |              |
|-------|----------------|-------|-----------|-----|-----------|----------|----------|--------------|
| LPS30 | <i>MUC4</i>    | chr3  | 195508571 | A G | 9880      | 3294     | T>A      | missense     |
| LPS30 | <i>MUC4</i>    | chr3  | 195508574 | G C | 9877      | 3293     | D>H      | missense     |
| LPS30 | <i>MUC4</i>    | chr3  | 195510005 | T C | 8446      | 2816     | S>P      | missense     |
| LPS30 | <i>MUC4</i>    | chr3  | 195510073 | C T | 8378      | 2793     | A>V      | missense     |
| LPS30 | <i>MUC4</i>    | chr3  | 195510821 | T C | 7630      | 2544     | S>P      | missense     |
| LPS30 | <i>MUC4</i>    | chr3  | 195512480 | T C | 5971      | 1991     | S>P      | missense     |
| LPS30 | <i>MUC4</i>    | chr3  | 195513755 | A T | 4696      | 1566     | T>S      | missense     |
| LPS30 | <i>MUC4</i>    | chr3  | 195515383 | C A | 3068      | 1023     | T>N      | missense     |
| LPS30 | <i>ZDHHC4</i>  | chr7  | 6623017   | T C | 451       | 151      | C>R      | missense     |
| LPS30 | <i>MUC12</i>   | chr7  | 100637017 | C A | 3173      | 1058     | T>K      | missense     |
| LPS30 | <i>PLEC</i>    | chr8  | 144992660 | G A | 11341     | 3781     | E>K      | missense     |
| LPS30 | <i>PLEC</i>    | chr8  | 144998654 | C T | 5455      | 1819     | R>W      | missense     |
| LPS30 | <i>MXRA5</i>   | chrX  | 3239099   | C A | 4627      | 1543     | P>T      | missense     |
| LPS30 | <i>NEUROD4</i> | chr12 | 55420785  | G A | 562       | 188      | D>N      | missense     |
| LPS30 | <i>ZNF611</i>  | chr19 | 53209226  | A G | 1082      | 361      | H>R      | missense     |
| LPS30 | <i>TTI1</i>    | chr20 | 36640810  | G A | 1409      | 470      | R>H      | missense     |
| LPS30 | <i>CDH12</i>   | chr5  | 22212753  | C T |           | splicing | splicing | splicing     |
| LPS30 | <i>DNAJC14</i> | chr12 | 56221695  | C T | 748       | 250      | A>T      | missense     |
| LPS30 | <i>SACS</i>    | chr13 | 23906349  | T A | 11666     | 3889     | Q>L      | missense     |
| LPS30 | <i>BRCA2</i>   | chr13 | 32929075  | T A | 7085      | 2362     | L>X      | stopgain SNV |
| LPS30 | <i>IQGAP1</i>  | chr15 | 90997783  | G T | 1611      | 537      | E>D      | missense     |
| LPS30 | <i>TTI1</i>    | chr20 | 36640810  | C T | 1409      | 470      | R>H      | missense     |
| LPS30 | <i>SLC5A3</i>  | chr21 | 35468558  | T C | 1061      | 354      | L>P      | missense     |
| LPS30 | <i>MUC4</i>    | chr3  | 195507876 | G C | 10575     | 3525     | D>E      | missense     |
| LPS30 | <i>MUC4</i>    | chr3  | 195512455 | G T | 5996      | 1999     | T>N      | missense     |
| LPS30 | <i>MUC4</i>    | chr3  | 195508324 | C T | 10127     | 3376     | R>H      | missense     |
| LPS31 | <i>CSMD2</i>   | chr1  | 34011669  | G A | 8683      | 2879     | G>D      | missense     |
| LPS31 | <i>FCAMR</i>   | chr1  | 207134235 | G A | 986       | 329      | G>D      | missense     |
| LPS31 | <i>RYR2</i>    | chr1  | 237619939 | C T | 1516      | 506      | H>Y      | missense     |
| LPS31 | <i>PIK3CA</i>  | chr3  | 178952085 | A T | 3140      | 1047     | H>L      | missense     |
| LPS31 | <i>MUC4</i>    | chr3  | 195513605 | C T | 4846      | 1616     | P>S      | missense     |
| LPS31 | <i>COG5</i>    | chr7  | 107053002 | G A | 707       | 236      | R>Q      | missense     |
| LPS31 | <i>PTEN</i>    | chr10 | 89720852  | C T | 1003      | 335      | R>X      | stopgain     |
| LPS31 | <i>SACS</i>    | chr13 | 23905131  | C T | 12884     | 4295     | P>L      | missense     |
| LPS31 | <i>DLG4</i>    | chr17 | 7106253   | T G | 885       | 295      | S>R      | missense     |
| LPS31 | <i>TP53</i>    | chr17 | 7579362   | T G | 325       | 109      | F>V      | missense     |
| LPS31 | <i>TP53</i>    | chr17 | 7579705   | G A | 91        | 31       | V>I      | missense     |
| LPS31 | <i>MYH3</i>    | chr17 | 10533687  | A G | 5375      | 1792     | K>R      | missense     |
| LPS31 | <i>DNAH17</i>  | chr17 | 76497339  | G A | 5410      | 1804     | D>N      | missense     |
| LPS31 | <i>STAT5A</i>  | chr17 | 40459727  | G A | 1892      | 631      | W>X      | stopgain SNV |
| LPS31 | <i>MUC4</i>    | chr3  | 195511325 | A C | 7126      | 2376     | S>A      | missense     |
| LPS31 | <i>EGFR</i>    | chr7  | 55273141  | C A | 3464      | 1155     | A>D      | missense     |
| LPS31 | <i>DPP6</i>    | chr7  | 153749970 | C T | 65        | 22       | P>L      | missense     |
| LPS31 | <i>GLI1</i>    | chr12 | 57864987  | G C | 2080      | 694      | V>L      | missense     |
| LPS31 | <i>POLE</i>    | chr12 | 133252700 | C T | 1000      | 334      | V>I      | missense     |
| LPS32 | <i>MUC4</i>    | chr3  | 195506362 | C G | 12089     | 4030     | A G      | missense     |
| LPS32 | <i>FRG1</i>    | chr4  | 190873398 | C T | 215       | 72       | A V      | missense     |
| LPS32 | <i>FRG1</i>    | chr4  | 190873412 | C A | 229       | 77       | L I      | missense     |
| LPS32 | <i>FRG1</i>    | chr4  | 190876263 | A T | 389       | 130      | D V      | missense     |
| LPS32 | <i>ZNF75D</i>  | chrX  | 134427902 | C G | 165       | 55       | F L      | missense     |
| LPS32 | <i>SACS</i>    | chr13 | 23929778  | G A | 973       | 325      | G R      | missense     |
| LPS32 | <i>DST</i>     | chr6  | 56481130  | C T | 7135      | 2379     | A>T      | missense     |
| LPS32 | <i>MUC12</i>   | chr7  | 100634583 | G A | 739       | 247      | E>K      | missense     |
| LPS32 | <i>MUC4</i>    | chr3  | 195509423 | G A | 9028      | 3010     | P>S      | missense     |
| LPS32 | <i>MYO3A</i>   | chr10 | 26312989  | C T | 770       | 257      | S>L      | missense     |
| LPS33 | <i>MUC4</i>    | chr3  | 195512724 | C G | 5727      | 1909     | C G      | missense     |
| LPS33 | <i>SEC63</i>   | chr6  | 108279107 | C G | 107       | 36       | P R      | missense     |
| LPS33 | <i>ZHX2</i>    | chr8  | 123965756 | G A | 2006      | 669      | R Q      | missense     |
| LPS33 | <i>PTPRD</i>   | chr9  | 8486278   | G T | 2539      | 847      | G T      | missense     |
| LPS33 | <i>FAM47C</i>  | chrX  | 37028425  | A G | 1942      | 648      | A G      | missense     |
| LPS33 | <i>TEP1</i>    | chr14 | 20848429  | G T | 4968      | 1656     | G T      | missense     |
| LPS33 | <i>HSD17B2</i> | chr16 | 82124538  | T G | 696       | 232      | T G      | stopgain     |
| LPS33 | <i>DNAAF1</i>  | chr16 | 84203675  | G T | 1241      | 414      | G T      | missense     |
| LPS33 | <i>MYH3</i>    | chr17 | 10533717  | G A | 5345      | 1782     | G A      | missense     |
| LPS33 | <i>DNAH17</i>  | chr17 | 76430258  | T C | 12077     | 4026     | T C      | missense     |
| LPS33 | <i>MTOR</i>    | chr1  | 11204749  | G   | 4828_4829 | 1610     | E>fs     | frameshift   |

|       |                 |       |           |     |           |       |      |                      |           |
|-------|-----------------|-------|-----------|-----|-----------|-------|------|----------------------|-----------|
|       |                 |       |           |     |           |       |      |                      | insertion |
| LPS33 | <i>SYT6</i>     | chr1  | 114680173 | C/T | 1015      | 339   | A>T  | missense             |           |
| LPS33 | <i>WFS1</i>     | chr4  | 6293079   | C/A | 616       | 206   | Q>K  | missense             |           |
| LPS33 | <i>MUC12</i>    | chr7  | 100634272 | G/A | 428       | 143   | S>N  | missense             |           |
| LPS33 | <i>KIAA1033</i> | chr12 | 105557916 | A/C | 3185      | 1062  | D>A  | missense             |           |
| LPS34 | <i>MUC4</i>     | chr3  | 195506014 | C/T | 12437     | 4146  | P>L  | missense             |           |
| LPS34 | <i>FRG1</i>     | chr4  | 190883009 | T/C | 662       | 221   | L>P  | missense             |           |
| LPS34 | <i>MUC12</i>    | chr7  | 100636285 | C/T | 2441      | 814   | T>I  | missense             |           |
| LPS34 | <i>FANCB</i>    | chrX  | 14861817  | A/G | 2452      | 818   | R>G  | missense             |           |
| LPS34 | <i>PCDH15</i>   | chr10 | 55582636  | A/G | 4643      | 1548  | N>S  | missense             |           |
| LPS34 | <i>STAT6</i>    | chr12 | 57492585  | C/A | 2056      | 686   | P>T  | missense             |           |
| LPS34 | <i>PPFIA2</i>   | chr12 | 81660770  | T/A | 3201      | 1067  | N>K  | missense             |           |
| LPS34 | <i>PRRT2</i>    | chr16 | 29824442  | E/K | 67        | 23    | E>K  | missense             |           |
| LPS34 | <i>CYTIP</i>    | chr2  | 158291218 | C/A | 216       | 72    | W>C  | missense             |           |
| LPS34 | <i>XIRP2</i>    | chr2  | 168105193 | A/G | 6625      | 2209  | K>E  | missense             |           |
| LPS34 | <i>MUC12</i>    | chr7  | 100645780 | C/T | 11936     | 3979  | A>V  | missense             |           |
| LPS34 | <i>DNAH17</i>   | chr17 | 76481724  | A/G | 7391      | 2464  | L>P  | missense             |           |
| LPS35 | <i>ZDHHC4</i>   | chr7  | 6623017   | T/C | 451       | 151   | T>C  | missense             |           |
| LPS35 | <i>SACS</i>     | chr13 | 23909676  | T/G | 8339      | 2780  | T>G  | missense             |           |
| LPS35 | <i>CGNL1</i>    | chr15 | 57816923  | C/A | 3031      | 1005  | L>M  | missense             |           |
| LPS35 | <i>MAPK7</i>    | chr17 | 19285352  | C/T | 1736      | 579   | A>V  | missense             |           |
| LPS35 | <i>DNAH17</i>   | chr17 | 76533473  | G/A | 2767      | 923   | G>S  | missense             |           |
| LPS35 | <i>PLCB4</i>    | chr20 | 9374275   | A/G | 1364      | 455   | K>R  | missense             |           |
| LPS35 | <i>HDAC10</i>   | chr22 | 50687098  | T/C | 899       | 300   | V>A  | missense             |           |
| LPS35 | <i>ZNF135</i>   | chr19 | 58574825  | C/T | 208       | 70    | P>S  | missense             |           |
| LPS35 | <i>MXRA5</i>    | chrX  | 3229597   | G/A | 6647      | 2216  | A>V  | missense             |           |
| LPS35 | <i>APC</i>      | chr5  | 112177017 | A/T | 5672      | 1891  | K>M  | missense             |           |
| LPS35 | <i>NF1</i>      | chr17 | 29663677  | A/G | 6109      | 2037  | I>V  | missense             |           |
| LPS35 | <i>SEMA3G</i>   | chr3  | 52469744  | G/A | 2224      | 742   | R>W  | missense             |           |
| LPS35 | <i>PTEN</i>     | chr10 | 89653835  | G/- | 133       | 45    | V>fs | frameshift deletion  |           |
| LPS35 | <i>MUC12</i>    | chr7  | 100643574 | A/G | 9730      | 3244  | T>A  | missense             |           |
| LPS36 | <i>USP48</i>    | chr1  | 22033028  | G/A | 2143      | 715   | E>K  | missense             |           |
| LPS36 | <i>FRG1</i>     | chr4  | 190873398 | C/T | 215       | 72    | A>V  | missense             |           |
| LPS36 | <i>FER1L6</i>   | chr8  | 125103704 | G/A | 4432      | 1478  | E>K  | missense             |           |
| LPS36 | <i>ZNF135</i>   | chr19 | 58578555  | A/C | 739       | 247   | T>P  | missense             |           |
| LPS36 | <i>MDC1</i>     | chr6  | 30672734  | G/A | 4226      | 1409  | P>L  | missense             |           |
| LPS36 | <i>MGAM</i>     | chr7  | 141750046 | A/G | 2599      | 867   | N>D  | missense             |           |
| LPS37 | <i>ADAMTS4</i>  | chr1  | 161168120 | T/C | 298       | 100   | S>P  | missense             |           |
| LPS37 | <i>KDM5B</i>    | chr1  | 202710733 | G/C | 2707      | 903   | E>Q  | missense             |           |
| LPS37 | <i>MUC4</i>     | chr3  | 195513601 | T/G | 4850      | 1617  | L>R  | missense             |           |
| LPS37 | <i>FRG1</i>     | chr4  | 190873370 | G/A | 187       | 63    | E>K  | missense             |           |
| LPS37 | <i>FRG1</i>     | chr4  | 190883009 | T/C | 662       | 221   | L>P  | missense             |           |
| LPS37 | <i>MUC12</i>    | chr7  | 100637253 | G/A | 3409      | 1137  | G>S  | missense             |           |
| LPS37 | <i>KIAA1033</i> | chr12 | 105527595 | T/C | 1247      | 416   | M>T  | missense             |           |
| LPS37 | <i>CGNL1</i>    | chr15 | 57816882  | G/A | 2972      | 991   | R>K  | missense             |           |
| LPS37 | <i>LLGL1</i>    | chr17 | 18145527  | C/T | 2930      | 977   | P>L  | missense             |           |
| LPS37 | <i>ERBB2</i>    | chr17 | 37871547  | C/A | 1067      | 356   | A>D  | missense             |           |
| LPS37 | <i>DNAH17</i>   | chr17 | 76446894  | T/C | 10769     | 13590 | I>T  | missense             |           |
| LPS37 | <i>DNAH17</i>   | chr17 | 76510927  | C/T | 4042      | 1348  | R>C  | missense             |           |
| LPS37 | <i>DNAH17</i>   | chr17 | 76548866  | G/A | 2200      | 7341  | V>I  | missense             |           |
| LPS37 | <i>LIPE</i>     | chr19 | 42912229  | G/A | 1555      | 519   | D>N  | missense             |           |
| LPS37 | <i>CHEK2</i>    | chr22 | 29083914  | C/T | 1603      | 535   | R>C  | missense             |           |
| LPS37 | <i>MUC4</i>     | chr3  | 195507796 | G/A | 10655     | 3552  | P>L  | missense             |           |
| LPS37 | <i>MDC1</i>     | chr6  | 30679999  | G/A | 1720      | 574   | H>Y  | missense             |           |
| LPS37 | <i>MUC4</i>     | chr3  | 195509998 | G/A | 8453      | 2818  | P>L  | missense             |           |
| LPS37 | <i>MUC12</i>    | chr7  | 100651918 | C/T | 15062     | 5021  | T>I  | missense             |           |
| LPS37 | <i>DOCK4</i>    | chr7  | 111555870 | T/C | 1156      | 386   | T>A  | missense             |           |
| LPS37 | <i>RPUSD2</i>   | chr15 | 40866327  | G/A | 1505      | 502   | C>Y  | missense             |           |
| LPS37 | <i>TP53BP1</i>  | chr15 | 43748588  | C/T | 2218      | 740   | D>N  | missense             |           |
| LPS37 | <i>CHD6</i>     | chr20 | 40033369  | G/A | 8012      | 2671  | P>L  | missense             |           |
| LPS37 | <i>ZNF75D</i>   | chrX  | 134424999 | A/C | 474       | 158   | N>K  | missense             |           |
| LPS37 | <i>MUC4</i>     | chr3  | 195508228 | G/C | 10223     | 3408  | P>R  | missense             |           |
| LPS37 | <i>NF1</i>      | chr17 | 29553477  | I/C | 2026_2027 | 676   | T>fs | frameshift insertion |           |
| LPS38 | <i>DNAH14</i>   | chr1  | 225268106 | C/A | 2792      | 931   | A>D  | missense             |           |

|       |                   |       |           |     |           |         |      |                        |
|-------|-------------------|-------|-----------|-----|-----------|---------|------|------------------------|
| LPS38 | <i>SEMA3G</i>     | chr3  | 52469941  | C A | 2027      | 676     | A>D  | missense               |
| LPS38 | <i>MUC4</i>       | chr3  | 195510100 | C G | 8351      | 2784    | P>R  | missense               |
| LPS38 | <i>ABCC3</i>      | chr17 | 48742513  |     |           |         |      | missense               |
| LPS39 | <i>USP34</i>      | chr2  | 61441439  | C G | 8438      | 2813    | P>R  | missense               |
| LPS39 | <i>MUC4</i>       | chr3  | 195511804 | C T | 6647      | 2216    | S>L  | missense               |
| LPS39 | <i>MUC4</i>       | chr3  | 195512215 | C A | 6236      | 2079    | T>N  | missense               |
| LPS39 | <i>FRG1</i>       | chr4  | 190876263 | A T | 389       | 130     | D>V  | missense               |
| LPS39 | <i>MUC12</i>      | chr7  | 100634700 | G C | 856       | 286     | D>H  | missense               |
| LPS39 | <i>CSMD3</i>      | chr8  | 113662518 | A G | 3065      | 1022    | Y>C  | missense               |
| LPS39 | <i>PLEC</i>       | chr8  | 145049380 | T C | 158       | 53      | L>P  | missense               |
| LPS39 | <i>EGFR</i>       | chr7  | 55238022  | G T | 1903      | 635     | A>S  | missense               |
| LPS39 | <i>MIA2</i>       | chr14 | 39709847  | C T | 332       | 111     | T>M  | missense               |
| LPS39 | <i>COG1</i>       | chr17 | 71193106  | G C | 628       | 210     | E>Q  | missense               |
| LPS39 | <i>ZNF135</i>     | chr19 | 58578735  | G T | 919       | 307     | E>X  | stopgain SNV           |
| LPS39 | <i>SEZ6L</i>      | chr22 | 26688743  | CTC | 466_468   | 156_156 | del  | nonframeshift deletion |
| LPS40 | <i>ERBB4</i>      | chr2  | 212652807 | G A | 499       | 1671    | V>I  | missense               |
| LPS40 | <i>MUC4</i>       | chr3  | 195511076 | A C | 7375      | 2459    | T>P  | missense               |
| LPS40 | <i>MUC4</i>       | chr3  | 195516350 | G A | 2101      | 701     | G>R  | missense               |
| LPS40 | <i>MUC12</i>      | chr7  | 100644430 | C T | 10586     | 3529    | C>T  | missense               |
| LPS40 | <i>MGAM</i>       | chr7  | 141795404 | A G | 4810      | 1604    | I>V  | missense               |
| LPS40 | <i>CSMD3</i>      | chr8  | 113299353 | T C | 9271      | 3091    | S>P  | missense               |
| LPS40 | <i>FER1L6</i>     | chr8  | 125083826 | C T | 4046      | 1349    | P>L  | missense               |
| LPS40 | <i>UBQLNL</i>     | chr11 | 5536386   | T C | 1286      | 429     | M>T  | missense               |
| LPS40 | <i>OR5M3</i>      | chr11 | 56237441  | C T | 533       | 178     | A>V  | missense               |
| LPS40 | <i>OR5M3</i>      | chr11 | 56237454  | C A | 520       | 174     | H>N  | missense               |
| LPS40 | <i>OR5M3</i>      | chr11 | 56237805  | A G | 169       | 57      | M>V  | missense               |
| LPS40 | <i>TELO2</i>      | chr16 | 1551750   | C T | 1448      | 483     | A>V  | missense               |
| LPS40 | <i>DNAH17</i>     | chr17 | 76420015  | C G | 13361     | 4454    | A>G  | missense               |
| LPS40 | <i>DNAH17</i>     | chr17 | 76565322  | G A | 1210      | 404     | V>M  | missense               |
| LPS40 | <i>LIPE</i>       | chr19 | 42914964  | G A | 914       | 305     | R>H  | missense               |
| LPS40 | <i>WFS1</i>       | chr4  | 6296874   | G T | 819       | 273     | E>D  | missense               |
| LPS40 | <i>XIRP2</i>      | chr2  | 168104762 | C   | 6194_6195 | 2065    | C>fs | frameshift insertion   |
| LPS41 | <i>ZMYM4</i>      | chr1  | 35846970  | C T | 1292      | 431     | P>L  | missense               |
| LPS41 | <i>MUC4</i>       | chr3  | 195508067 | A C | 10384     | 3462    | T>P  | missense               |
| LPS41 | <i>MUC4</i>       | chr3  | 195509401 | T C | 9050      | 3017    | I>T  | missense               |
| LPS41 | <i>MUC4</i>       | chr3  | 195511012 | C A | 7439      | 2480    | P>H  | missense               |
| LPS41 | <i>PLEC</i>       | chr8  | 145004388 | G A | 2548      | 850     | G>S  | missense               |
| LPS41 | <i>SVIL</i>       | chr10 | 29779914  | G A | 2776      | 926     | V>I  | missense               |
| LPS41 | <i>OR8H2</i>      | chr11 | 55872943  | T C | 425       | 142     | L>P  | missense               |
| LPS41 | <i>NEUROD4</i>    | chr12 | 55420891  | A G | 668       | 223     | H>R  | missense               |
| LPS41 | <i>MYH3</i>       | chr17 | 10541497  | G A | 3592      | 1198    | A>T  | missense               |
| LPS41 | <i>KRTAP10-11</i> | chr21 | 46066833  | A T | 458       | 153     | K>M  | missense               |
| LPS41 | <i>PCDH15</i>     | chr10 | 55721636  | C G | 2672      | 891     | R>P  | missense               |
| LPS42 | <i>SPHKAP</i>     | chr2  | 228883123 | G A | 2447      | 816     | R>H  | missense               |
| LPS42 | <i>ROBO1</i>      | chr3  | 78688908  | C G | 2888      | 963     | C>G  | missense               |
| LPS42 | <i>PIK3CA</i>     | chr3  | 178952085 | A G | 3140      | 1047    | H>R  | missense               |
| LPS42 | <i>DPP6</i>       | chr7  | 154564589 | T C | 1073      | 358     | V>A  | missense               |
| LPS42 | <i>MXRA5</i>      | chrX  | 3240238   | G A | 3488      | 1163    | R>H  | missense               |
| LPS42 | <i>BTBD7</i>      | chr14 | 93760935  | T C | 431       | 144     | V>A  | missense               |
| LPS42 | <i>BTBD7</i>      | chr14 | 93760936  | G A | 430       | 144     | V>I  | missense               |
| LPS42 | <i>NF1</i>        | chr17 | 29553477  | C   | 2026_2027 | 676     | T>fs | frameshift insertion   |
| LPS43 | <i>KDM5B</i>      | chr1  | 202700156 | G A | 4057      | 1353    | A>T  | missense               |
| LPS43 | <i>DNAH14</i>     | chr1  | 225268106 | C A | 2792      | 931     | A>D  | missense               |
| LPS43 | <i>MGAM</i>       | chr7  | 141803124 | T C | 5381      | 1794    | L>S  | missense               |
| LPS43 | <i>PLEC</i>       | chr8  | 144996830 | G A | 7279      | 2427    | A>T  | missense               |
| LPS43 | <i>FAT3</i>       | chr11 | 92086828  | T C | 1550      | 517     | L>S  | missense               |
| LPS43 | <i>KIAA1033</i>   | chr12 | 105538204 | G A | 2150      | 717     | R>Q  | missense               |
| LPS43 | <i>CHEK2</i>      | chr22 | 29083914  | C T | 1603      | 535     | R>C  | missense               |
| LPS43 | <i>DNAH17</i>     | chr17 | 76480963  | C A | 7636      | 2546    | D>Y  | missense               |
| LPS44 | <i>PRKD3</i>      | chr2  | 37513364  | A G | 866       | 289     | K>R  | missense               |
| LPS44 | <i>PIKFYVE</i>    | chr2  | 209200079 | T C | 4192      | 1398    | F>L  | missense               |
| LPS44 | <i>MUC4</i>       | chr3  | 195486102 | G A | 2018      | 673     | R>H  | missense               |
| LPS44 | <i>MUC4</i>       | chr3  | 195510005 | T C | 8446      | 2816    | S>P  | missense               |

|       |                 |       |           |     |           |      |      |                      |
|-------|-----------------|-------|-----------|-----|-----------|------|------|----------------------|
| LPS44 | <i>MUC4</i>     | chr3  | 195510011 | G/A | 8440      | 2814 | A>T  | missense             |
| LPS44 | <i>MUC4</i>     | chr3  | 195513532 | C/T | 4919      | 1640 | S>L  | missense             |
| LPS44 | <i>MUC4</i>     | chr3  | 195517076 | G/A | 1375      | 459  | A>T  | missense             |
| LPS44 | <i>MUC4</i>     | chr3  | 195518120 | A/C | 331       | 111  | M>L  | missense             |
| LPS44 | <i>APC</i>      | chr5  | 112043485 | C/T | 71        | 24   | S>F  | missense             |
| LPS44 | <i>PLEC</i>     | chr8  | 144994514 | G/A | 9487      | 3163 | A>T  | missense             |
| LPS44 | <i>MXRA5</i>    | chrX  | 3239362   | C/T | 4364      | 1455 | A>V  | missense             |
| LPS44 | <i>MXRA5</i>    | chrX  | 3240106   | A/T | 3620      | 1207 | D>V  | missense             |
| LPS44 | <i>MXRA5</i>    | chrX  | 3240107   | G/A | 3619      | 1207 | D>N  | missense             |
| LPS44 | <i>MXRA5</i>    | chrX  | 3240140   | G/A | 3586      | 1196 | V>M  | missense             |
| LPS44 | <i>MXRA5</i>    | chrX  | 3240145   | G/A | 3581      | 1194 | S>N  | missense             |
| LPS44 | <i>MXRA5</i>    | chrX  | 3240238   | G/A | 3488      | 1163 | R>H  | missense             |
| LPS44 | <i>MXRA5</i>    | chrX  | 3240253   | G/A | 3473      | 1158 | R>H  | missense             |
| LPS44 | <i>MXRA5</i>    | chrX  | 3241032   | A/G | 2694      | 898  | I>M  | missense             |
| LPS44 | <i>OR8H2</i>    | chr11 | 55872943  | T/C | 425       | 142  | L>P  | missense             |
| LPS44 | <i>FAT3</i>     | chr11 | 92570856  | G/T | 10252     | 3418 | A>S  | missense             |
| LPS44 | <i>TELO2</i>    | chr16 | 1545589   | T/C | 578       | 193  | V>A  | missense             |
| LPS44 | <i>TP53</i>     | chr17 | 7578208   | A/G | 245       | 82   | H>R  | missense             |
| LPS44 | <i>OTOP3</i>    | chr17 | 72937649  | C/T | 235       | 79   | R>W  | missense             |
| LPS44 | <i>MUC4</i>     | chr3  | 195511957 | T/A | 6494      | 2165 | D>V  | missense             |
| LPS44 | <i>BTBD7</i>    | chr14 | 93760476  | C/T | 890       | 297  | R>Q  | missense             |
| LPS44 | <i>MUC4</i>     | chr3  | 195508700 | C/T | 9751      | 3251 | V>I  | missense             |
| LPS44 | <i>MUC4</i>     | chr3  | 195507876 | G/C | 10575     | 3525 | D>E  | missense             |
| LPS44 | <i>NF1</i>      | chr17 | 29553477  | C   | 2026_2027 | 676  | T>fs | frameshift insertion |
| LPS45 | <i>MUC4</i>     | chr3  | 195508544 | T/A | 9907      | 3303 | S>T  | missense             |
| LPS45 | <i>MUC4</i>     | chr3  | 195510146 | C/G | 8305      | 2769 | L>V  | missense             |
| LPS45 | <i>TRAPPC11</i> | chr4  | 184585165 | G/C | 145       | 49   | V>L  | missense             |
| LPS45 | <i>APC</i>      | chr5  | 112178027 | G/A | 6682      | 2228 | V>I  | missense             |
| LPS45 | <i>FER1L6</i>   | chr8  | 125047645 | C/T | 2414      | 805  | C>T  | missense             |
| LPS45 | <i>OR8H2</i>    | chr11 | 55872943  | T/C | 425       | 142  | T>C  | missense             |
| LPS45 | <i>TEP1</i>     | chr14 | 20874411  | A/G | 716       | 239  | H>R  | missense             |
| LPS45 | <i>TTI1</i>     | chr20 | 36640975  | T/C | 1244      | 415  | I>T  | missense             |
| LPS46 | <i>XIRP2</i>    | chr2  | 168074745 | G/A | 127       | 43   | E>K  | missense             |
| LPS46 | <i>XIRP2</i>    | chr2  | 168103244 | T/C | 4674      | 1559 | I>T  | missense             |
| LPS46 | <i>PIK3CA</i>   | chr3  | 178938787 | A/G | 2029      | 677  | N>D  | missense             |
| LPS46 | <i>MUC4</i>     | chr3  | 195506399 | C/A | 12052     | 4018 | P>T  | missense             |
| LPS46 | <i>MUC4</i>     | chr3  | 195509345 | G/A | 9106      | 3036 | G>S  | missense             |
| LPS46 | <i>MUC4</i>     | chr3  | 195511156 | G/C | 7295      | 2432 | R>P  | missense             |
| LPS46 | <i>MUC4</i>     | chr3  | 195511186 | T/C | 7265      | 2422 | L>P  | missense             |
| LPS46 | <i>MUC4</i>     | chr3  | 195512219 | G/A | 6232      | 2078 | A>T  | missense             |
| LPS46 | <i>MUC4</i>     | chr3  | 195512339 | A/G | 6112      | 2038 | T>A  | missense             |
| LPS46 | <i>MUC4</i>     | chr3  | 195512734 | A/C | 5717      | 1906 | H>P  | missense             |
| LPS46 | <i>MUC4</i>     | chr3  | 195512750 | G/C | 5701      | 1901 | D>H  | missense             |
| LPS46 | <i>MUC4</i>     | chr3  | 195515198 | G/C | 3253      | 1085 | D>H  | missense             |
| LPS46 | <i>MUC4</i>     | chr3  | 195515209 | C/T | 3242      | 1081 | A>V  | missense             |
| LPS46 | <i>MUC4</i>     | chr3  | 195515257 | C/A | 3194      | 1065 | A>E  | missense             |
| LPS46 | <i>WFS1</i>     | chr4  | 6303017   | C/T | 1495      | 499  | L>F  | missense             |
| LPS46 | <i>WFS1</i>     | chr4  | 6303857   | G/A | 2335      | 779  | V>M  | missense             |
| LPS46 | <i>DST</i>      | chr6  | 56418399  | A/G | 7322      | 2441 | Q>R  | missense             |
| LPS46 | <i>MUC12</i>    | chr7  | 100635844 | C/T | 2000      | 667  | S>L  | missense             |
| LPS46 | <i>MUC12</i>    | chr7  | 100658913 | C/T | 15818     | 5273 | P>L  | missense             |
| LPS46 | <i>MGAM</i>     | chr7  | 141738362 | C/T | 2263      | 755  | H>Y  | missense             |
| LPS46 | <i>PLEC</i>     | chr8  | 145013572 | A/G | 58        | 20   | S>G  | missense             |
| LPS46 | <i>PTPRD</i>    | chr9  | 8460508   | A/G | 3778      | 1260 | I>V  | missense             |
| LPS46 | <i>MXRA5</i>    | chrX  | 3240445   | C/T | 3281      | 1094 | T>I  | missense             |
| LPS46 | <i>DRGX</i>     | chr10 | 50574234  | C/T | 734       | 245  | P>L  | missense             |
| LPS46 | <i>OR5M3</i>    | chr11 | 56237441  | C/T | 533       | 178  | A>V  | missense             |
| LPS46 | <i>OR5M3</i>    | chr11 | 56237454  | C/A | 520       | 174  | H>N  | missense             |
| LPS46 | <i>OR5M3</i>    | chr11 | 56237805  | A/G | 169       | 57   | M>V  | missense             |
| LPS46 | <i>HEPHL1</i>   | chr11 | 93796782  | C/T | 524       | 175  | T>I  | missense             |
| LPS46 | <i>ATM</i>      | chr11 | 108138010 | A/G | 2579      | 860  | D>G  | missense             |
| LPS46 | <i>TEP1</i>     | chr14 | 20873695  | T/C | 785       | 262  | M>T  | missense             |
| LPS46 | <i>TP53BP1</i>  | chr15 | 43749149  | A/G | 1657      | 553  | T>A  | missense             |
| LPS46 | <i>FANCA</i>    | chr16 | 89811469  | C/T | 3524      | 1175 | P>L  | missense             |
| LPS46 | <i>MYH3</i>     | chr17 | 10534960  | G/A | 5254      | 1752 | A>T  | missense             |



|       |                   |       |           |     |       |      |     |          |
|-------|-------------------|-------|-----------|-----|-------|------|-----|----------|
| LPS46 | <i>DNAH17</i>     | chr17 | 76472713  | G/A | 8095  | 2699 | E>K | missense |
| LPS46 | <i>DNAH17</i>     | chr17 | 76501475  | G/A | 4856  | 1619 | R>Q | missense |
| LPS46 | <i>DNAH17</i>     | chr17 | 76502928  | C/A | 4677  | 1559 | S>R | missense |
| LPS46 | <i>ZNF611</i>     | chr19 | 53209906  | G/C | 402   | 134  | K>N | missense |
| LPS46 | <i>ZNF611</i>     | chr19 | 53219129  | G/C | 19    | 7    | A>P | missense |
| LPS46 | <i>ZNF135</i>     | chr19 | 58578703  | C/T | 887   | 296  | P>L | missense |
| LPS46 | <i>TTI1</i>       | chr20 | 36640619  | G/T | 1600  | 534  | A>S | missense |
| LPS46 | <i>KRTAP10-11</i> | chr21 | 46066823  | G/A | 448   | 150  | V>I | missense |
| LPS47 | <i>ZMYM4</i>      | chr1  | 35853140  | A/G | 2198  | 733  | K>R | missense |
| LPS47 | <i>CYTIP</i>      | chr2  | 158272436 | C/T | 833   | 278  | T>M | missense |
| LPS47 | <i>FANCD2</i>     | chr3  | 10128928  | C/T | 3446  | 1149 | A>V | missense |
| LPS47 | <i>MUC4</i>       | chr3  | 195509383 | C/A | 9068  | 3023 | T>N | missense |
| LPS47 | <i>MUC4</i>       | chr3  | 195510770 | C/G | 7681  | 2561 | L>V | missense |
| LPS47 | <i>MUC4</i>       | chr3  | 195511258 | C/T | 7193  | 2398 | T>I | missense |
| LPS47 | <i>MUC4</i>       | chr3  | 195511879 | C/T | 6572  | 2191 | T>I | missense |
| LPS47 | <i>MUC4</i>       | chr3  | 195515263 | C/T | 3188  | 1063 | S>F | missense |
| LPS47 | <i>DST</i>        | chr6  | 56494193  | G/A | 2719  | 907  | E>K | missense |
| LPS47 | <i>MUC12</i>      | chr7  | 100636543 | C/G | 2699  | 900  | T>S | missense |
| LPS47 | <i>MGAM</i>       | chr7  | 141763330 | G/A | 4289  | 1430 | G>E | missense |
| LPS47 | <i>MGAM</i>       | chr7  | 141803214 | C/T | 5471  | 1824 | S>F | missense |
| LPS47 | <i>PLEC</i>       | chr8  | 145001159 | A/G | 3943  | 1315 | S>G | missense |
| LPS47 | <i>HEPHL1</i>     | chr11 | 93803554  | C/A | 1078  | 360  | Q>K | missense |
| LPS47 | <i>TEP1</i>       | chr14 | 20837573  | C/T | 7586  | 2529 | A>V | missense |
| LPS47 | <i>XRCC1</i>      | chr19 | 44050759  | G/T | 1414  | 472  | G>W | missense |
| LPS48 | <i>DNAH14</i>     | chr1  | 225490865 | A/G | 8360  | 2787 | Y>C | missense |
| LPS48 | <i>MUC4</i>       | chr3  | 195509401 | T/C | 9050  | 3017 | A>T | missense |
| LPS48 | <i>MUC4</i>       | chr3  | 195516350 | G/A | 2101  | 701  | G>R | missense |
| LPS48 | <i>MUC12</i>      | chr7  | 100647091 | C/T | 13247 | 4416 | P>L | missense |
| LPS48 | <i>DPP6</i>       | chr7  | 153749952 | G/C | 47    | 16   | R>T | missense |
| LPS48 | <i>MXRA5</i>      | chrX  | 3240238   | G/A | 3488  | 1163 | R>H | missense |
| LPS48 | <i>MXRA5</i>      | chrX  | 3240253   | G/A | 3473  | 1158 | R>H | missense |
| LPS48 | <i>MXRA5</i>      | chrX  | 3261745   | C/T | 130   | 44   | R>X | missense |
| LPS48 | <i>ZNF280C</i>    | chrX  | 129370463 | C/T | 644   | 215  | S>F | missense |
| LPS48 | <i>SLITRK2</i>    | chrX  | 144904813 | T/G | 870   | 290  | N>K | missense |
| LPS48 | <i>FAT3</i>       | chr11 | 92624267  | G/T | 13662 | 4554 | Q>H | missense |
| LPS48 | <i>KIAA1033</i>   | chr12 | 105512284 | G/A | 496   | 166  | A>T | missense |
| LPS48 | <i>XRCC1</i>      | chr19 | 44055777  | G/A | 1145  | 382  | R>H | missense |
| LPS49 | <i>PUM1</i>       | chr1  | 31465377  | A/C | 1018  | 340  | M>L | missense |
| LPS49 | <i>DNAH14</i>     | chr1  | 225268106 | C/A | 2792  | 931  | A>D | missense |
| LPS49 | <i>ZBTB38</i>     | chr3  | 141162449 | C/T | 1219  | 407  | R>C | missense |
| LPS49 | <i>MUC4</i>       | chr3  | 195506233 | C/T | 12218 | 4073 | A>V | missense |
| LPS49 | <i>MUC4</i>       | chr3  | 195512099 | C/A | 6352  | 2118 | A>T | missense |
| LPS49 | <i>WFS1</i>       | chr4  | 6292945   | G/A | 482   | 161  | R>Q | missense |
| LPS49 | <i>PDE1C</i>      | chr7  | 31855577  | T/G | 1774  | 592  | S>A | missense |
| LPS49 | <i>MGAM</i>       | chr7  | 141732634 | G/A | 1594  | 532  | E>K | missense |
| LPS49 | <i>PLEC</i>       | chr8  | 145002053 | C/T | 3380  | 1127 | P>L | missense |
| LPS49 | <i>ATM</i>        | chr11 | 108160480 | T/G | 4388  | 1463 | F>C | missense |
| LPS49 | <i>NDUFA9</i>     | chr12 | 4771733   | C/T | 587   | 196  | P>L | missense |
| LPS49 | <i>DAZAP2</i>     | chr12 | 51636178  | T/C | 377   | 126  | L>P | missense |
| LPS49 | <i>SACS</i>       | chr13 | 23929378  | C/T | 1373  | 458  | T>I | missense |
| LPS49 | <i>DNAAF1</i>     | chr16 | 84203737  | G/A | 1303  | 435  | D>N | missense |
| LPS49 | <i>DNAH17</i>     | chr17 | 76565533  | C/A | 1121  | 374  | S>Y | missense |
| LPS50 | <i>CSMD2</i>      | chr1  | 34071533  | G/C | 6279  | 2093 | E>D | missense |
| LPS50 | <i>DNAH14</i>     | chr1  | 225586807 | G/A | 13384 | 4462 | A>T | missense |
| LPS50 | <i>MUC4</i>       | chr3  | 195507316 | C/T | 11135 | 3712 | P>L | missense |
| LPS50 | <i>MUC4</i>       | chr3  | 195510976 | G/T | 7475  | 2492 | G>V | missense |
| LPS50 | <i>MUC4</i>       | chr3  | 195511081 | C/A | 7370  | 2457 | A>E | missense |
| LPS50 | <i>DST</i>        | chr6  | 56457044  | A/G | 4970  | 1657 | K>R | missense |
| LPS50 | <i>PDE1C</i>      | chr7  | 31855577  | T/G | 1774  | 592  | S>A | missense |
| LPS51 | <i>XIRP2</i>      | chr2  | 168099316 | T/C | 748   | 250  | S>P | missense |
| LPS51 | <i>XIRP2</i>      | chr2  | 168101537 | C/T | 2969  | 990  | I>T | missense |
| LPS51 | <i>ROBO1</i>      | chr3  | 79067604  | C/T | 8     | 3    | A>V | missense |
| LPS51 | <i>MUC4</i>       | chr3  | 195506060 | G/C | 12391 | 4131 | V>L | missense |
| LPS51 | <i>MUC4</i>       | chr3  | 195506303 | C/A | 12148 | 4050 | P>T | missense |
| LPS51 | <i>MUC4</i>       | chr3  | 195509077 | A/G | 9374  | 3125 | D>G | missense |

|       |                 |       |           |     |       |      |     |          |
|-------|-----------------|-------|-----------|-----|-------|------|-----|----------|
| LPS51 | <i>MUC4</i>     | chr3  | 195509078 | G/A | 9373  | 3125 | D>N | missense |
| LPS51 | <i>MUC4</i>     | chr3  | 195512480 | T/C | 5971  | 1991 | S>P | missense |
| LPS51 | <i>MUC4</i>     | chr3  | 195516350 | G/A | 2101  | 701  | G>R | missense |
| LPS51 | <i>KIT</i>      | chr4  | 55595614  | C/G | 2092  | 698  | L>V | missense |
| LPS51 | <i>FRG1</i>     | chr4  | 190876263 | A/T | 389   | 130  | D>V | missense |
| LPS51 | <i>MDC1</i>     | chr6  | 30671807  | C/T | 5153  | 1718 | P>L | missense |
| LPS51 | <i>MDC1</i>     | chr6  | 30671959  | C/G | 5001  | 1667 | D>E | missense |
| LPS51 | <i>MDC1</i>     | chr6  | 30672028  | G/T | 4932  | 1644 | R>S | missense |
| LPS51 | <i>MDC1</i>     | chr6  | 30680442  | T/C | 1277  | 426  | I>T | missense |
| LPS51 | <i>MAGEB6</i>   | chrX  | 26212477  | G/C | 514   | 172  | G>R | missense |
| LPS51 | <i>NEUROD4</i>  | chr12 | 55420785  | G/A | 562   | 188  | D>N | missense |
| LPS51 | <i>MAPK6</i>    | chr15 | 52357148  | C/T | 2117  | 706  | P>L | missense |
| LPS51 | <i>FANCA</i>    | chr16 | 89825107  | C/G | 2859  | 953  | D>E | missense |
| LPS52 | <i>SPHKAP</i>   | chr2  | 228881332 | C/T | 4238  | 1413 | P>L | missense |
| LPS52 | <i>MUC4</i>     | chr3  | 195507521 | G/A | 10930 | 3644 | G>S | missense |
| LPS52 | <i>MUC4</i>     | chr3  | 195507876 | C/G | 10575 | 3525 | D>E | missense |
| LPS52 | <i>MUC4</i>     | chr3  | 195508094 | C/G | 10357 | 3453 | H>D | missense |
| LPS52 | <i>MUC4</i>     | chr3  | 195508117 | G/A | 10334 | 3445 | S>N | missense |
| LPS52 | <i>MUC4</i>     | chr3  | 195508118 | A/G | 10333 | 3445 | S>G | missense |
| LPS52 | <i>MUC4</i>     | chr3  | 195508418 | G/C | 10033 | 3345 | V>L | missense |
| LPS52 | <i>MUC4</i>     | chr3  | 195508453 | G/A | 9998  | 3333 | S>N | missense |
| LPS52 | <i>MUC4</i>     | chr3  | 195509249 | G/A | 9202  | 3068 | G>S | missense |
| LPS52 | <i>MUC4</i>     | chr3  | 195510005 | T/C | 8446  | 2816 | S>P | missense |
| LPS52 | <i>MUC4</i>     | chr3  | 195510073 | C/T | 8378  | 2793 | A>V | missense |
| LPS52 | <i>MUC4</i>     | chr3  | 195510085 | G/A | 8366  | 2789 | S>N | missense |
| LPS52 | <i>MUC4</i>     | chr3  | 195511404 | C/G | 7047  | 2349 | H>Q | missense |
| LPS52 | <i>MUC4</i>     | chr3  | 195512117 | G/T | 6334  | 2112 | A>S | missense |
| LPS52 | <i>MUC4</i>     | chr3  | 195515257 | C/A | 3194  | 1065 | A>E | missense |
| LPS52 | <i>MUC4</i>     | chr3  | 195515383 | C/A | 3068  | 1023 | T>N | missense |
| LPS52 | <i>TRAPPC11</i> | chr4  | 184587424 | G/C | 219   | 73   | E>D | missense |
| LPS52 | <i>DST</i>      | chr6  | 56400047  | G/C | 8945  | 2982 | C>S | missense |
| LPS52 | <i>MUC12</i>    | chr7  | 100660897 | T/C | 15919 | 5307 | Y>H | missense |
| LPS52 | <i>DOCK4</i>    | chr7  | 111379198 | C/G | 5197  | 1733 | P>A | missense |
| LPS52 | <i>MXRA5</i>    | chrX  | 3240650   | C/T | 3076  | 1026 | P>S | missense |
| LPS52 | <i>MXRA5</i>    | chrX  | 3241739   | A/G | 1987  | 663  | T>A | missense |
| LPS52 | <i>FAT3</i>     | chr11 | 92088447  | C/T | 3169  | 1057 | R>C | missense |
| LPS52 | <i>HEPHL1</i>   | chr11 | 93803598  | G/C | 1122  | 374  | K>N | missense |
| LPS53 | <i>ITSN2</i>    | chr2  | 24432835  | A/C | 4325  | 1442 | Y>S | missense |
| LPS53 | <i>SPHKAP</i>   | chr2  | 228883499 | G/A | 2071  | 691  | D>N | missense |
| LPS53 | <i>MUC4</i>     | chr3  | 195508453 | G/A | 9998  | 3333 | S>N | missense |
| LPS53 | <i>MUC4</i>     | chr3  | 195510155 | G/A | 8296  | 2766 | A>T | missense |
| LPS53 | <i>ETV7</i>     | chr6  | 36334749  | C/T | 580   | 194  | R>W | missense |
| LPS53 | <i>DOPEY1</i>   | chr6  | 83806760  | G/A | 64    | 22   | D>N | missense |
| LPS53 | <i>SVIL</i>     | chr10 | 29839785  | G/T | 568   | 190  | G>C | missense |
| LPS53 | <i>FAT3</i>     | chr11 | 92532626  | G/T | 6447  | 2149 | L>F | missense |
| LPS53 | <i>ERBB3</i>    | chr12 | 56493492  | G/A | 2900  | 967  | R>K | missense |
| LPS53 | <i>BRCA2</i>    | chr13 | 32907183  | A/G | 1568  | 523  | H>R | missense |
| LPS53 | <i>TELO2</i>    | chr16 | 1547104   | G/C | 681   | 227  | Q>H | missense |
| LPS53 | <i>FANCA</i>    | chr16 | 89851304  | C/G | 1428  | 476  | F>L | missense |
| LPS53 | <i>DNAH17</i>   | chr17 | 76481692  | G/A | 7423  | 2475 | D>N | missense |
| LPS53 | <i>SEZ6L</i>    | chr22 | 26688840  | G/A | 563   | 188  | R>Q | missense |
| LPS54 | <i>ZMYM4</i>    | chr1  | 35870648  | G/A | 3553  | 1185 | V>M | missense |
| LPS54 | <i>SPHKAP</i>   | chr2  | 228886543 | C/T | 581   | 194  | T>I | missense |
| LPS54 | <i>SPHKAP</i>   | chr2  | 228886544 | A/T | 580   | 194  | T>S | missense |
| LPS54 | <i>ADH6</i>     | chr4  | 100130064 | G/A | 589   | 197  | A>T | missense |
| LPS54 | <i>MDC1</i>     | chr6  | 30675807  | A/G | 2549  | 850  | E>G | missense |
| LPS54 | <i>FER1L6</i>   | chr8  | 125081694 | T/C | 3812  | 1271 | I>T | missense |
| LPS54 | <i>STOX1</i>    | chr10 | 70645782  | G/A | 2230  | 744  | E>K | missense |
| LPS54 | <i>MIA2</i>     | chr14 | 39716698  | C/A | 920   | 307  | T>N | missense |
| LPS54 | <i>ZNF611</i>   | chr19 | 53208581  | G/A | 1727  | 576  | S>N | missense |
| LPS54 | <i>ZNF611</i>   | chr19 | 53209990  | T/G | 318   | 106  | I>M | missense |
| LPS54 | <i>ZNF611</i>   | chr19 | 53210025  | A/C | 283   | 95   | S>R | missense |
| LPS57 | <i>FRG1</i>     | chr4  | 190883009 | T/C | 662   | 221  | L>P | missense |
| LPS57 | <i>MUC12</i>    | chr7  | 100634892 | G/A | 1048  | 350  | A>T | missense |
| LPS57 | <i>BTBD7</i>    | chr14 | 93712301  | C/T | 2453  | 818  | P>L | missense |
| LPS57 | <i>BRCA1</i>    | chr17 | 41231356  | T/C | 4418  | 1473 | I>T | missense |

|       |                   |       |           |     |           |      |      |                      |
|-------|-------------------|-------|-----------|-----|-----------|------|------|----------------------|
| LPS57 | <i>KRTAP10-11</i> | chr21 | 46066872  | C A | 497       | 166  | S>Y  | missense             |
| LPS57 | <i>SEMA3G</i>     | chr3  | 52475656  | T C | 601       | 201  | M>V  | missense             |
| LPS57 | <i>CACNA1D</i>    | chr3  | 53839069  | G A | 5573      | 1858 | R>Q  | missense             |
| LPS57 | <i>ROS1</i>       | chr6  | 117678977 | G A | 3844      | 1282 | P>S  | missense             |
| LPS57 | <i>SVIL</i>       | chr10 | 29773618  | A T | 3644      | 1215 | L>Q  | missense             |
| LPS58 | <i>FRG1</i>       | chr4  | 190873412 | C A | 229       | 77   | L>I  | missense             |
| LPS58 | <i>FRG1</i>       | chr4  | 190876263 | A T | 389       | 130  | D>V  | missense             |
| LPS58 | <i>DST</i>        | chr6  | 56394455  | G A | 9517      | 3173 | D>N  | missense             |
| LPS58 | <i>THSD7A</i>     | chr7  | 11676433  | G A | 346       | 116  | D>N  | missense             |
| LPS58 | <i>MGAM</i>       | chr7  | 141754571 | G C | 3177      | 1059 | K>N  | missense             |
| LPS58 | <i>FER1L6</i>     | chr8  | 125022902 | A G | 1769      | 590  | Q>R  | missense             |
| LPS58 | <i>PCDH15</i>     | chr10 | 55582674  | G T | 4605      | 1535 | R>S  | missense             |
| LPS58 | <i>MIA2</i>       | chr14 | 39716293  | C A | 515       | 172  | T>N  | missense             |
| LPS58 | <i>LIPE</i>       | chr19 | 42911903  | G A | 1697      | 566  | R>H  | missense             |
| LPS58 | <i>ZNF611</i>     | chr19 | 53210025  | A C | 283       | 95   | S>R  | missense             |
| LPS58 | <i>ZNF135</i>     | chr19 | 58579693  | C T | 1913      | 638  | S>F  | missense             |
| LPS58 | <i>RYR2</i>       | chr1  | 237713869 | G T | 3092      | 1031 | R>L  | missense             |
| LPS58 | <i>SEC63</i>      | chr6  | 108279193 | C G | 21        | 7    | Q>H  | missense             |
| LPS59 | <i>FAT3</i>       | chr11 | 92087559  | G A | 2281      | 761  | V>M  | missense             |
| LPS59 | <i>SPOCK3</i>     | chr4  | 168155231 | C   | 94_95     | 32   | R>fs | frameshift insertion |
| LPS59 | <i>PLBD1</i>      | chr12 | 14664548  | C A | 942       | 314  | Q>H  | missense             |
| LPS59 | <i>MDC1</i>       | chr6  | 30670561  | G T | 5959      | 1987 | L>M  | missense             |
| LPS59 | <i>PLBD1</i>      | chr12 | 14656807  | A   | 1561_1562 | 521  | R>fs | frameshift insertion |
| LPS59 | <i>ATM</i>        | chr11 | 108192089 | A C | 6514      | 2172 | T>P  | missense             |
| LPS59 | <i>SPHKAP</i>     | chr2  | 228884717 | G A | 853       | 285  | R>X  | stopgain SNV         |
| LPS59 | <i>TTI1</i>       | chr20 | 36641168  | A G | 1051      | 351  | C>R  | missense             |
| LPS59 | <i>APC</i>        | chr5  | 112177434 | A   | 6089_6090 | 2030 | P>fs | frameshift insertion |
| LPS59 | <i>STAT1</i>      | chr2  | 191849061 | T A | 1322      | 441  | Q>L  | missense             |
| LPS59 | <i>MCM6</i>       | chr2  | 136622724 | C   | 937_938   | 313  | K>fs | frameshift insertion |
| LPS59 | <i>ADAMTS4</i>    | chr1  | 161167945 | C   | 473_474   | 158  | A>fs | frameshift insertion |
| LPS61 | <i>SYT6</i>       | chr1  | 114680207 | G A | 726       | 242  | M>I  | missense             |
| LPS61 | <i>FRG1</i>       | chr4  | 190873398 | C T | 215       | 72   | A>V  | missense             |
| LPS61 | <i>FRG1</i>       | chr4  | 190873412 | C A | 229       | 77   | L>I  | missense             |
| LPS61 | <i>AGAP2</i>      | chr12 | 58126703  | G A | 601       | 201  | A>T  | missense             |
| LPS61 | <i>PPFIA2</i>     | chr12 | 81769660  | G A | 749       | 250  | S>N  | missense             |
| LPS61 | <i>POLE</i>       | chr12 | 133218264 | G A | 5347      | 1783 | D>N  | missense             |
| LPS61 | <i>CHEK2</i>      | chr22 | 29090043  | G A | 1438      | 480  | A>T  | missense             |
| LPS62 | <i>STXBP3</i>     | chr1  | 109315383 | G A | 535       | 179  | D>N  | missense             |
| LPS62 | <i>PARP1</i>      | chr1  | 226568779 | C G | 1290      | 430  | I>M  | missense             |
| LPS62 | <i>ZBTB38</i>     | chr3  | 141161943 | G A | 713       | 238  | R>H  | missense             |
| LPS62 | <i>MUC4</i>       | chr3  | 195508228 | C G | 10223     | 3408 | P>R  | missense             |
| LPS62 | <i>MUC4</i>       | chr3  | 195509354 | G T | 9097      | 3033 | A>S  | missense             |
| LPS62 | <i>MUC4</i>       | chr3  | 195513601 | T G | 4850      | 1617 | L>R  | missense             |
| LPS62 | <i>FRG1</i>       | chr4  | 190873398 | C T | 215       | 72   | A>V  | missense             |
| LPS62 | <i>DOPEY1</i>     | chr6  | 83841940  | C T | 2662      | 888  | Q>X  | stopgain             |
| LPS62 | <i>MUC12</i>      | chr7  | 100648363 | G A | 14519     | 4840 | S>N  | missense             |
| LPS62 | <i>LPL</i>        | chr8  | 19818567  | G C | 1295      | 432  | R>T  | missense             |
| LPS62 | <i>TTI2</i>       | chr8  | 33360956  | T G | 1250      | 417  | L>R  | missense             |
| LPS62 | <i>HEPFL1</i>     | chr11 | 93779033  | G A | 365       | 122  | R>Q  | missense             |
| LPS62 | <i>DNAJC14</i>    | chr12 | 56221791  | C T | 652       | 218  | P>S  | missense             |
| LPS62 | <i>LLGL1</i>      | chr17 | 18144825  | T C | 2563      | 855  | C>R  | missense             |
| LPS62 | <i>ABCC3</i>      | chr17 | 48753897  | C T | 3326      | 1109 | P>L  | missense             |
| LPS62 | <i>ABCC3</i>      | chr17 | 48755222  | C G | 3496      | 1166 | R>G  | missense             |
| LPS62 | <i>ZNF611</i>     | chr19 | 53208943  | A T | 1365      | 455  | K>N  | missense             |
| LPS62 | <i>ZNF611</i>     | chr19 | 53209226  | A G | 1082      | 361  | H>R  | missense             |
| LPS62 | <i>ZNF611</i>     | chr19 | 53209365  | T C | 943       | 315  | Y>H  | missense             |
| LPS62 | <i>ZNF611</i>     | chr19 | 53209368  | C T | 940       | 314  | R>C  | missense             |
| LPS63 | <i>DST</i>        | chr6  | 56481427  | C T | 6838      | 2280 | Q>X  | stopgain             |
| LPS63 | <i>MXRA5</i>      | chrX  | 3241318   | C G | 2408      | 803  | P>R  | missense             |
| LPS63 | <i>MYO3A</i>      | chr10 | 26359125  | T C | 1256      | 419  | I>T  | missense             |
| LPS63 | <i>WDR66</i>      | chr12 | 122399945 | C T | 2369      | 790  | T>I  | missense             |

|       |                 |       |           |     |       |      |     |          |
|-------|-----------------|-------|-----------|-----|-------|------|-----|----------|
| LPS63 | <i>POLE</i>     | chr12 | 133209337 | C/T | 6049  | 2017 | R>C | missense |
| LPS63 | <i>NF1</i>      | chr17 | 29552200  | A/G | 1933  | 645  | M>V | missense |
| LPS63 | <i>ABCC3</i>    | chr17 | 48750483  | G/T | 2393  | 798  | G>V | missense |
| LPS63 | <i>DNAH17</i>   | chr17 | 76522985  | C/T | 3601  | 1201 | R>W | missense |
| LPS64 | <i>ZMYM4</i>    | chr1  | 35824720  | G/A | 280   | 94   | D>N | missense |
| LPS64 | <i>ADAMTS4</i>  | chr1  | 161161275 | C/T | 2167  | 723  | R>W | missense |
| LPS64 | <i>RYR2</i>     | chr1  | 237972294 | G/A | 14392 | 4798 | D>N | missense |
| LPS64 | <i>PIKFYVE</i>  | chr2  | 209190719 | T/C | 3184  | 1062 | F>L | missense |
| LPS64 | <i>SPHKAP</i>   | chr2  | 228884362 | C/A | 1208  | 403  | A>E | missense |
| LPS64 | <i>MUC4</i>     | chr3  | 195507205 | G/A | 11246 | 3749 | S>N | missense |
| LPS64 | <i>MUC4</i>     | chr3  | 195507271 | C/G | 11180 | 3727 | T>S | missense |
| LPS64 | <i>MUC4</i>     | chr3  | 195508415 | C/A | 10036 | 3346 | P>T | missense |
| LPS64 | <i>MUC4</i>     | chr3  | 195516451 | C/T | 2000  | 667  | P>L | missense |
| LPS64 | <i>DST</i>      | chr6  | 56483760  | C/T | 5072  | 1691 | S>F | missense |
| LPS64 | <i>BRAF</i>     | chr7  | 140439659 | G/A | 2080  | 694  | A>T | missense |
| LPS64 | <i>PLEC</i>     | chr8  | 144991205 | G/A | 12796 | 4266 | V>I | missense |
| LPS64 | <i>PCDH15</i>   | chr10 | 55663053  | G/A | 3238  | 1080 | G>R | missense |
| LPS64 | <i>TELO2</i>    | chr16 | 1557677   | C/G | 2367  | 789  | D>E | missense |
| LPS64 | <i>NF1</i>      | chr17 | 29553610  | G/A | 2159  | 720  | R>Q | missense |
| LPS64 | <i>ERBB2</i>    | chr17 | 37866641  | G/T | 718   | 240  | A>S | missense |
| LPS64 | <i>ABCC3</i>    | chr17 | 48753036  | C/T | 2759  | 920  | C>T | missense |
| LPS64 | <i>DNAH17</i>   | chr17 | 76446386  | A/G | 10990 | 3664 | I>V | missense |
| LPS64 | <i>DNAH17</i>   | chr17 | 76487632  | C/T | 6562  | 2188 | R>X | stopgain |
| LPS64 | <i>ZNF611</i>   | chr19 | 53209909  | A/T | 399   | 133  | K>N | missense |
| LPS65 | <i>USP34</i>    | chr2  | 61433170  | C/G | 9136  | 3046 | L>V | missense |
| LPS65 | <i>MUC4</i>     | chr3  | 195510757 | A/G | 7694  | 2565 | D>G | missense |
| LPS65 | <i>MUC4</i>     | chr3  | 195510758 | G/A | 7693  | 2565 | D>N | missense |
| LPS65 | <i>MUC4</i>     | chr3  | 195513068 | G/T | 5383  | 1795 | V>F | missense |
| LPS65 | <i>EGF</i>      | chr4  | 110885619 | A/G | 1501  | 501  | T>A | missense |
| LPS65 | <i>DOPEY1</i>   | chr6  | 83841983  | A/C | 2705  | 902  | N>T | missense |
| LPS65 | <i>MUC12</i>    | chr7  | 100635289 | G/A | 1445  | 482  | G>D | missense |
| LPS65 | <i>MUC12</i>    | chr7  | 100644430 | C/T | 10586 | 3529 | T>M | missense |
| LPS65 | <i>OR2A14</i>   | chr7  | 143826464 | C/A | 259   | 87   | Q>K | missense |
| LPS65 | <i>RNF32</i>    | chr7  | 156447325 | G/C | 330   | 110  | W>C | missense |
| LPS65 | <i>FER1L6</i>   | chr8  | 125072864 | T/C | 3061  | 1021 | C>R | missense |
| LPS65 | <i>DRGX</i>     | chr10 | 50574204  | C/T | 764   | 255  | T>I | missense |
| LPS65 | <i>BRCA2</i>    | chr13 | 32971071  | C/T | 9538  | 3180 | L>F | missense |
| LPS65 | <i>TP53BP1</i>  | chr15 | 43749236  | A/G | 1570  | 524  | T>A | missense |
| LPS65 | <i>CGNL1</i>    | chr15 | 57731245  | A/G | 1048  | 350  | I>V | missense |
| LPS65 | <i>STAT5A</i>   | chr17 | 40451868  | G/A | 650   | 217  | R>H | missense |
| LPS65 | <i>DNAH17</i>   | chr17 | 76455237  | C/T | 9707  | 3236 | T>M | missense |
| LPS65 | <i>ZSCAN18</i>  | chr19 | 58596077  | C/G | 1676  | 559  | P>R | missense |
| LPS66 | <i>CSMD2</i>    | chr1  | 33999455  | C/T | 9500  | 3167 | S>F | missense |
| LPS66 | <i>MUC4</i>     | chr3  | 195510959 | C/T | 7492  | 2498 | P>S | missense |
| LPS66 | <i>WFS1</i>     | chr4  | 6303549   | G/A | 2027  | 676  | R>H | missense |
| LPS66 | <i>WDR96</i>    | chr10 | 105967431 | C/T | 887   | 296  | S>L | missense |
| LPS66 | <i>FAT3</i>     | chr11 | 92532370  | G/T | 6191  | 2964 | R>L | missense |
| LPS66 | <i>TP53BP1</i>  | chr15 | 43705467  | G/T | 5149  | 1717 | A>S | missense |
| LPS66 | <i>CDH1</i>     | chr16 | 68846047  | A/G | 1018  | 340  | T>A | missense |
| LPS66 | <i>ZNF611</i>   | chr19 | 53208684  | G/A | 1624  | 542  | V>I | missense |
| LPS67 | <i>FAT3</i>     | chr11 | 92565111  | G/T | 9805  | 3269 | A>S | missense |
| LPS67 | <i>DNAH17</i>   | chr17 | 76562718  | C/A | 1547  | 516  | S>I | missense |
| LPS67 | <i>PIK3CG</i>   | chr7  | 106508826 | G/A | 820   | 274  | V>I | missense |
| LPS67 | <i>ROS1</i>     | chr6  | 117709142 | C/T | 1815  | 605  | W>X | stopgain |
| LPS68 | <i>TRAPPC11</i> | chr4  | 184585165 | G/C | 145   | 49   | V>L | missense |
| LPS68 | <i>MDC1</i>     | chr6  | 30671206  | A/G | 5671  | 1891 | T>A | missense |
| LPS68 | <i>DST</i>      | chr6  | 56483865  | G/C | 4967  | 1656 | S>T | missense |
| LPS68 | <i>PLEC</i>     | chr8  | 144996868 | C/T | 7241  | 2414 | A>V | missense |
| LPS68 | <i>OR5M3</i>    | chr11 | 56237572  | G/A | 402   | 134  | M>I | missense |
| LPS69 | <i>DARS2</i>    | chr1  | 173802601 | G/A | 580   | 194  | V>I | missense |
| LPS69 | <i>ITSN2</i>    | chr2  | 24432835  | A/C | 4325  | 1442 | Y>S | missense |
| LPS69 | <i>CYTIP</i>    | chr2  | 158300469 | C/G | 64    | 22   | P>A | missense |
| LPS69 | <i>MUC4</i>     | chr3  | 195507271 | C/G | 11180 | 3727 | T>S | missense |
| LPS69 | <i>MUC4</i>     | chr3  | 195508021 | G/A | 10430 | 477  | S>N | missense |
| LPS69 | <i>MUC4</i>     | chr3  | 195508022 | A/G | 10429 | 3477 | S>G | missense |
| LPS69 | <i>MUC4</i>     | chr3  | 195511061 | C/T | 7390  | 2464 | P>S | missense |



|       |                   |       |           |     |           |      |      |                      |
|-------|-------------------|-------|-----------|-----|-----------|------|------|----------------------|
| LPS69 | <i>MUC4</i>       | chr3  | 195511177 | C G | 7274      | 2425 | A>G  | missense             |
| LPS69 | <i>TRAPPC11</i>   | chr4  | 184622952 | C A | 2954      | 985  | S>Y  | missense             |
| LPS69 | <i>MUC12</i>      | chr7  | 100634146 | C A | 302       | 101  | A>E  | missense             |
| LPS69 | <i>MUC12</i>      | chr7  | 100634901 | G A | 1057      | 353  | G>S  | missense             |
| LPS69 | <i>MUC12</i>      | chr7  | 100635127 | C A | 1283      | 428  | S>Y  | missense             |
| LPS69 | <i>MUC12</i>      | chr7  | 100635267 | A G | 1423      | 475  | M>V  | missense             |
| LPS69 | <i>MUC12</i>      | chr7  | 100635288 | G A | 1444      | 482  | G>S  | missense             |
| LPS69 | <i>MUC12</i>      | chr7  | 100638844 | C G | 5000      | 1667 | T>S  | missense             |
| LPS69 | <i>MUC12</i>      | chr7  | 100646796 | G A | 12952     | 4318 | G>S  | missense             |
| LPS69 | <i>MUC12</i>      | chr7  | 100648048 | G A | 14204     | 4735 | S>N  | missense             |
| LPS69 | <i>MUC12</i>      | chr7  | 100648078 | C G | 14234     | 4745 | S>C  | missense             |
| LPS69 | <i>MOGAT3</i>     | chr7  | 100841509 | A T | 631       | 211  | K>X  | stopgain             |
| LPS69 | <i>PIK3CG</i>     | chr7  | 106515148 | T C | 2291      | 764  | I>T  | missense             |
| LPS69 | <i>WDR96</i>      | chr10 | 105923874 | C A | 3224      | 1075 | T>K  | missense             |
| LPS69 | <i>PPP2R1B</i>    | chr11 | 111631612 | C A | 470       | 157  | T>K  | missense             |
| LPS69 | <i>ERBB3</i>      | chr12 | 56487560  | A T | 1493      | 498  | K>I  | missense             |
| LPS69 | <i>BTBD7</i>      | chr14 | 93760935  | T C | 431       | 144  | V>A  | missense             |
| LPS69 | <i>BTBD7</i>      | chr14 | 93760936  | G A | 430       | 144  | V>I  | missense             |
| LPS69 | <i>DNAH17</i>     | chr17 | 76472697  | C T | 8111      | 2704 | T>I  | missense             |
| LPS69 | <i>SEZ6L</i>      | chr22 | 26688840  | G A | 563       | 188  | R>Q  | missense             |
| LPS70 | <i>ITSN2</i>      | chr2  | 24432835  | A C | 4325      | 1442 | Y>S  | missense             |
| LPS70 | <i>SPHKAP</i>     | chr2  | 228884308 | G A | 1262      | 421  | S>N  | missense             |
| LPS70 | <i>FANCD2</i>     | chr3  | 10107104  | C T | 2195      | 732  | P>L  | missense             |
| LPS70 | <i>MUC4</i>       | chr3  | 195512278 | C G | 6173      | 2058 | S>C  | missense             |
| LPS70 | <i>SVIL</i>       | chr10 | 29821947  | A T | 1349      | 450  | E>V  | missense             |
| LPS70 | <i>PCDH15</i>     | chr10 | 55582674  | G T | 4605      | 1535 | R>S  | missense             |
| LPS70 | <i>HEPHL1</i>     | chr11 | 93844989  | C T | 3409      | 1137 | L>F  | missense             |
| LPS70 | <i>KIAA1033</i>   | chr12 | 105531781 | C T | 1444      | 482  | L>F  | missense             |
| LPS70 | <i>POLE</i>       | chr12 | 133237641 | G A | 2974      | 992  | A>T  | missense             |
| LPS70 | <i>ERCC4</i>      | chr16 | 14042187  | G A | 2734      | 912  | G>R  | missense             |
| LPS70 | <i>DNAAF1</i>     | chr16 | 84203734  | G A | 1300      | 434  | G>R  | missense             |
| LPS71 | <i>XIRP2</i>      | chr2  | 168103475 | C T | 4907      | 1636 | C>T  | missense             |
| LPS71 | <i>XIRP2</i>      | chr2  | 168114527 | A T | 1570      | 524  | A>T  | missense             |
| LPS71 | <i>MUC4</i>       | chr3  | 195512608 | G T | 5843      | 1948 | G>V  | missense             |
| LPS71 | <i>CDH12</i>      | chr5  | 21755787  | T A | 1798      | 600  | S>T  | missense             |
| LPS71 | <i>MOGAT3</i>     | chr7  | 100843714 | T A | 192       | 64   | Y>X  | stopgain             |
| LPS71 | <i>MXRA5</i>      | chrX  | 3240977   | C T | 2749      | 917  | P>S  | missense             |
| LPS71 | <i>COL2A1</i>     | chr12 | 48372421  | C A | 2647      | 883  | P>T  | missense             |
| LPS71 | <i>INTS6</i>      | chr13 | 51943248  | G A | 2303      | 768  | G>D  | missense             |
| LPS71 | <i>TEP1</i>       | chr14 | 20836615  | A T | 7865      | 2622 | Y>F  | missense             |
| LPS71 | <i>MAPK7</i>      | chr17 | 19285598  | C T | 1982      | 661  | T>I  | missense             |
| LPS71 | <i>DEFB125</i>    | chr20 | 76700     | G A | 113       | 38   | R>Q  | missense             |
| LPS71 | <i>DEFB125</i>    | chr20 | 77044     | C T | 457       | 153  | L>F  | missense             |
| LPS71 | <i>MUC12</i>      | chr7  | 100643388 | G C | 9544      | 3182 | A>P  | missense             |
| LPS71 | <i>HEPHL1</i>     | chr11 | 93837772  | G A | 2761      | 921  | V>I  | missense             |
| LPS71 | <i>XIRP2</i>      | chr2  | 168104863 | A   | 6295_6296 | 2099 | E>fs | frameshift insertion |
| LPS71 | <i>PARP1</i>      | chr1  | 226551692 | C T | 2738      | 913  | G>E  | missense             |
| LPS71 | <i>NF1</i>        | chr17 | 29553477  | C   | 2026_2027 | 676  | T>fs | frameshift insertion |
| LPS72 | <i>CSMD2</i>      | chr1  | 34554603  | C G | 259       | 87   | P>A  | missense             |
| LPS72 | <i>XIRP2</i>      | chr2  | 168106406 | T C | 7838      | 2613 | L>S  | missense             |
| LPS72 | <i>ROBO1</i>      | chr3  | 78656114  | C T | 4213      | 1405 | P>S  | missense             |
| LPS72 | <i>MUC4</i>       | chr3  | 195506762 | G C | 11689     | 3897 | A>P  | missense             |
| LPS72 | <i>MUC12</i>      | chr7  | 100635849 | C G | 2005      | 669  | P>A  | missense             |
| LPS72 | <i>PLEC</i>       | chr8  | 144998515 | A V | 5594      | 1865 | A>V  | missense             |
| LPS72 | <i>FAT3</i>       | chr11 | 92531397  | A T | 5218      | 1740 | I>F  | missense             |
| LPS72 | <i>ADAMTSL3</i>   | chr15 | 84651796  | G A | 3416      | 1139 | R>Q  | missense             |
| LPS72 | <i>SEZ6L</i>      | chr22 | 26688852  | C T | 575       | 192  | A>V  | missense             |
| LPS72 | <i>MUC4</i>       | chr3  | 195511327 | G A | 7124      | 2375 | S>F  | missense             |
| LPS72 | <i>MUC4</i>       | chr3  | 195511567 | G A | 6884      | 2295 | S>F  | missense             |
| LPS72 | <i>KRTAP10-11</i> | chr21 | 46066437  | A C | 62        | 21   | D>A  | missense             |
| LPS72 | <i>MUC4</i>       | chr3  | 195515258 | C G | 3193      | 1065 | A>P  | missense             |
| LPS72 | <i>NF1</i>        | chr17 | 29553477  | C   | 2026_2027 | 676  | T>fs | frameshift insertion |
| LPS73 | <i>USP48</i>      | chr1  | 22055168  | G C | 1345      | 449  | E>Q  | missense             |

|       |                 |       |           |           |           |      |            |                         |
|-------|-----------------|-------|-----------|-----------|-----------|------|------------|-------------------------|
| LPS73 | <i>DARS2</i>    | chr1  | 173802601 | G/A       | 580       | 194  | V>I        | missense                |
| LPS73 | <i>XIRP2</i>    | chr2  | 168103129 | G/A       | 4561      | 1521 | V>I        | missense                |
| LPS73 | <i>MUC4</i>     | chr3  | 195513493 | G/T       | 4958      | 1653 | S>I        | missense                |
| LPS73 | <i>MUC4</i>     | chr3  | 195518119 | T/A       | 332       | 111  | M>K        | missense                |
| LPS73 | <i>APC</i>      | chr5  | 112103050 | G/C       | 415       | 139  | E>Q        | missense                |
| LPS73 | <i>MDC1</i>     | chr6  | 30672479  | C/A       | 4481      | 1494 | P>H        | missense                |
| LPS73 | <i>MUC12</i>    | chr7  | 100657309 | A/T       | 15754     | 5252 | I>F        | missense                |
| LPS73 | <i>PLEC</i>     | chr8  | 144991205 | G/A       | 12796     | 4266 | V>I        | missense                |
| LPS73 | <i>FAT3</i>     | chr11 | 92086345  | G/A       | 1067      | 356  | C>Y        | missense                |
| LPS73 | <i>HEPHL1</i>   | chr11 | 93844989  | C/T       | 3409      | 1137 | L>F        | missense                |
| LPS73 | <i>DNAH17</i>   | chr17 | 76503831  | C/A       | 4293      | 1431 | H>Q        | missense                |
| LPS73 | <i>CHD6</i>     | chr20 | 40049349  | G/A       | 5926      | 1976 | A>T        | missense                |
| LPS73 | <i>HEPHL1</i>   | chr11 | 93808430  | A/T       | 1595      | 532  | D>V        | missense                |
| LPS73 | <i>PLBD1</i>    | chr12 | 14689639  | C/G       | 564       | 188  | M>I        | missense                |
| LPS74 | <i>CSMD2</i>    | chr1  | 34037197  | A/G       | 7898      | 2633 | Q>R        | missense                |
| LPS74 | <i>CSMD2</i>    | chr1  | 34090660  | A/G       | 5371      | 1791 | T>A        | missense                |
| LPS74 | <i>FANCD2</i>   | chr3  | 10135980  | G/A       | 3896      | 1299 | G>A        | missense                |
| LPS74 | <i>CACNA1D</i>  | chr3  | 53835116  | A/T       | 5132      | 1711 | N>I        | missense                |
| LPS74 | <i>MUC4</i>     | chr3  | 195506186 | G/T       | 12265     | 4089 | A>S        | missense                |
| LPS74 | <i>MUC4</i>     | chr3  | 195506252 | G/C       | 12199     | 4067 | V>L        | missense                |
| LPS74 | <i>DST</i>      | chr6  | 56391265  | G/A       | 10154     | 3385 | G>E        | missense                |
| LPS74 | <i>DST</i>      | chr6  | 56457152  | A/G       | 4862      | 1621 | N>S        | missense                |
| LPS74 | <i>ROS1</i>     | chr6  | 117639393 | A/G       | 5963      | 1988 | D>G        | missense                |
| LPS74 | <i>OR6B1</i>    | chr7  | 143701601 | C/T       | 512       | 171  | P>L        | missense                |
| LPS74 | <i>PLEC</i>     | chr8  | 144993467 | G/A       | 10534     | 3512 | D>N        | missense                |
| LPS74 | <i>ASB9</i>     | chrX  | 15270435  | G/A       | 374       | 125  | G>E        | missense                |
| LPS74 | <i>MYO3A</i>    | chr10 | 26414398  | G/A       | 1975      | 659  | G>R        | missense                |
| LPS74 | <i>TEP1</i>     | chr14 | 20852298  | C/T       | 3433      | 1145 | R>W        | missense                |
| LPS74 | <i>ADAMTSL3</i> | chr15 | 84506866  | G/A       | 626       | 209  | G>E        | missense                |
| LPS74 | <i>NF1</i>      | chr17 | 29552168  | T/C       | 1901      | 634  | I>T        | missense                |
| LPS74 | <i>DNAH17</i>   | chr17 | 76451830  | G/A       | 10066     | 3356 | V>I        | missense                |
| LPS74 | <i>ZNF611</i>   | chr19 | 53219129  | G/C       | 19        | 7    | G>C        | missense                |
| LPS74 | <i>DNAH14</i>   | chr1  | 225273310 | A/-       | 3392      | 1131 | E>fs       | frameshift deletion     |
| LPS74 | <i>PCDH15</i>   | chr10 | 55583015  | AATAGTATT | 4351_4352 | 1451 | delinsNTIE | nonframeshift insertion |
| LPS74 | <i>SPOCK3</i>   | chr4  | 167713323 | C/T       | 422       | 141  | S>N        | missense                |
| LPS75 | <i>HEG1</i>     | chr3  | 124731800 | A/T       | 2623      | 875  | T>S        | missense                |
| LPS75 | <i>THSD7A</i>   | chr7  | 11582681  | A/G       | 1517      | 506  | H>R        | missense                |
| LPS75 | <i>PCDH15</i>   | chr10 | 55582674  | G/T       | 4605      | 1535 | R>S        | missense                |
| LPS75 | <i>NF1</i>      | chr17 | 29541509  | A/C       | 1433      | 478  | K>T        | missense                |
| LPS75 | <i>NF1</i>      | chr17 | 29552200  | A/G       | 1933      | 645  | M>V        | missense                |
| LPS75 | <i>BRCA1</i>    | chr17 | 41231357  | A/G       | 4417      | 473  | I>V        | missense                |
| LPS75 | <i>BRCA1</i>    | chr17 | 41243886  | A/C       | 3662      | 1221 | E>A        | missense                |
| LPS75 | <i>DNAH17</i>   | chr17 | 76511061  | A/G       | 3908      | 1303 | D>G        | missense                |
| LPS75 | <i>DNAH17</i>   | chr17 | 76567763  | A/G       | 641       | 214  | Q>R        | missense                |
| LPS75 | <i>LIPE</i>     | chr19 | 42914568  | G/A       | 1310      | 437  | R>Q        | missense                |
| LPS75 | <i>DNAH14</i>   | chr1  | 225548560 | C/T       | 11675     | 3892 | S>L        | missense                |
| LPS75 | <i>NF1</i>      | chr17 | 29483133  | G/A       | 193       | 65   | V>I        | missense                |
| LPS75 | <i>DST</i>      | chr6  | 56336912  | A/G       | 14234     | 4745 | L>P        | missense                |
| LPS75 | <i>ROS1</i>     | chr6  | 117704637 | T/C       | 2339      | 780  | D>G        | missense                |
| LPS75 | <i>ERCC1</i>    | chr19 | 45924491  | T/C       | 266       | 89   | N>S        | missense                |
| LPS75 | <i>MXRA5</i>    | chrX  | 3238963   | C/T       | 4763      | 1588 | R>H        | missense                |
| LPS75 | <i>SLITRK2</i>  | chrX  | 144905516 | G/A       | 1573      | 525  | D>N        | missense                |
| LPS75 | <i>MUC12</i>    | chr7  | 100634331 | A         | 487_488   | 163  | E>fs       | frameshift insertion    |
| LPS75 | <i>DNAJC14</i>  | chr12 | 56222203  | C         | 240_241   | 80   | G>fs       | frameshift insertion    |
| LPS76 | <i>MUC4</i>     | chr3  | 195506003 | C/A       | 12448     | 4150 | P>T        | missense                |
| LPS76 | <i>FRG1</i>     | chr4  | 190876263 | A/T       | 389       | 130  | D>V        | missense                |
| LPS76 | <i>CDH12</i>    | chr5  | 22078686  | G/C       | 100       | 34   | E>Q        | missense                |
| LPS76 | <i>MUC12</i>    | chr7  | 100634484 | C/G       | 640       | 214  | P>A        | missense                |
| LPS76 | <i>TEP1</i>     | chr14 | 20847140  | G/A       | 5252      | 1751 | R>Q        | missense                |
| LPS76 | <i>TEP1</i>     | chr14 | 20849515  | G/A       | 4604      | 1535 | R>Q        | missense                |
| LPS76 | <i>DNAJC14</i>  | chr12 | 56221395  | C/G       | 1048      | 350  | V>L        | missense                |
| LPS77 | <i>DNAH14</i>   | chr1  | 225268106 | C/A       | 2792      | 931  | A>D        | missense                |
| LPS77 | <i>SEMA3A</i>   | chr7  | 83634712  | G/A       | 1303      | 435  | V>I        | missense                |

|        |                   |       |           |       |           |          |          |                        |
|--------|-------------------|-------|-----------|-------|-----------|----------|----------|------------------------|
| LPS77T | <i>DEFB135</i>    | chr8  | 11839887  | C T   | 58        | 20       | P>S      | missense               |
| LPS77T | <i>INTS6</i>      | chr13 | 51943288  | C G   | 2263      | 755      | L>V      | missense               |
| LPS77  | <i>FRG1</i>       | chr4  | 190878646 | G T   | 526       | 176      | E>X      | stopgain SNV           |
| LPS77  | <i>FOLR2</i>      | chr11 | 71929727  | T A   | 99        | 33       | D>E      | missense               |
| LPS77  | <i>FANCA</i>      | chr16 | 89807226  | G A   | 3814      | 1272     | H>Y      | missense               |
| LPS77  | <i>ZNF611</i>     | chr19 | 53208257  | C A   | 2051      | 684      | G>V      | missense               |
| LPS77  | <i>TP53</i>       | chr17 | 7577018   | C T   |           | splicing | splicing | splicing               |
| LPS78  | <i>RYR2</i>       | chr1  | 237802485 | G A   | 7099      | 2367     | G>R      | missense               |
| LPS78  | <i>MUC4</i>       | chr3  | 195507214 | C A   | 11237     | 3746     | P>H      | missense               |
| LPS78  | <i>MUC4</i>       | chr3  | 195508451 | C A   | 10000     | 3334     | P>T      | missense               |
| LPS78  | <i>MUC4</i>       | chr3  | 195508453 | G A   | 9998      | 3333     | S>N      | missense               |
| LPS78  | <i>SEC63</i>      | chr6  | 108279199 | G C   | 15        | 5        | Q>H      | missense               |
| LPS78  | <i>MGAM</i>       | chr7  | 141750579 | C T   | 2720      | 907      | T>M      | missense               |
| LPS78  | <i>MGAM</i>       | chr7  | 141803124 | T C   | 5381      | 1794     | L>S      | missense               |
| LPS78  | <i>CSMD3</i>      | chr8  | 114448951 | A G   | 133       | 45       | T>A      | missense               |
| LPS78  | <i>PLEC</i>       | chr8  | 145009036 | G A   | 899       | 300      | R>Q      | missense               |
| LPS78  | <i>DNAAF1</i>     | chr16 | 84199444  | C G   | 919       | 307      | Q>E      | missense               |
| LPS78  | <i>NF1</i>        | chr17 | 29552168  | T C   | 1901      | 634      | I>T      | missense               |
| LPS78  | <i>MUC4</i>       | chr3  | 195510785 | C T   | 7666      | 2556     | G>S      | missense               |
| LPS78  | <i>CSMD3</i>      | chr8  | 114448951 | T C   | 133       | 45       | T>A      | missense               |
| LPS78  | <i>ZBTB16</i>     | chr11 | 113935229 | G A   | 1207      | 403      | G>R      | missense               |
| LPS78  | <i>MUC4</i>       | chr3  | 195508324 | C T   | 10127     | 3376     | R>H      | missense               |
| LPS78  | <i>STAT6</i>      | chr12 | 57493136  | T A   | 1502      | 501      | Q>L      | missense               |
| LPS78  | <i>MUC4</i>       | chr3  | 195511889 | C T   | 6562      | 2188     | G>S      | missense               |
| LPS78  | <i>MUC4</i>       | chr3  | 195511985 | C T   | 6466      | 2156     | G>S      | missense               |
| LPS78  | <i>MUC4</i>       | chr3  | 195509423 | G A   | 9028      | 3010     | P>S      | missense               |
| LPS78  | <i>CSMD2</i>      | chr1  | 34181993  | C T   | 2990      | 997      | R>Q      | missense               |
| LPS78  | <i>MUC4</i>       | chr3  | 195507185 | C T   | 11266     | 3756     | G>S      | missense               |
| LPS79  | <i>VEPH1</i>      | chr3  | 157221258 |       |           |          |          | missense               |
| LPS79  | <i>DST</i>        | chr6  | 56480510  | A G   | 7755      | 2585     | I>M      | missense               |
| LPS79  | <i>DST</i>        | chr6  | 56481130  | G A   | 7135      | 2379     | A>T      | missense               |
| LPS79  | <i>PTPRD</i>      | chr9  | 8500931   | G C   | 1951      | 651      | A>P      | missense               |
| LPS79  | <i>STOX1</i>      | chr10 | 70644912  | A G   | 1360      | 454      | K>E      | missense               |
| LPS79  | <i>TP53BP1</i>    | chr15 | 43713320  | C A   | 4153      | 1385     | D>Y      | missense               |
| LPS79  | <i>EGFR</i>       | chr7  | 55238221  | CCT - | 2102_2104 | 701_702  | del      | nonframeshift deletion |
| LPS79  | <i>MUC12</i>      | chr7  | 100635316 | A G   | 1472      | 491      | E>G      | missense               |
| LPS79  | <i>DST</i>        | chr6  | 56481130  | C T   | 7135      | 2379     | A>T      | missense               |
| LPS79  | <i>MUC12</i>      | chr7  | 100635318 | A C   | 1474      | 492      | K>Q      | missense               |
| LPS79  | <i>PLEC</i>       | chr8  | 145012372 | G A   | 169       | 57       | R>C      | missense               |
| LPS79  | <i>FAT3</i>       | chr11 | 92086371  | G A   | 1093      | 365      | G>S      | missense               |
| LPS80  | <i>DOCK7</i>      | chr1  | 63099204  | G A   | 1081      | 361      | P>S      | missense               |
| LPS80  | <i>SYT6</i>       | chr1  | 114680443 | G C   | 745       | 249      | R>G      | missense               |
| LPS80  | <i>WDR66</i>      | chr12 | 122439498 | G A   | 3331      | 1111     | V>I      | missense               |
| LPS80  | <i>PPP2</i>       | chr13 | 103301494 | G C   | 2866      | 956      | D>H      | missense               |
| LPS80  | <i>KCNK10</i>     | chr14 | 88658663  | A G   | 758       | 253      | V>A      | missense               |
| LPS80  | <i>B2M</i>        | chr15 | 45003745  | A G   | 1         | 1        | M>V      | missense               |
| LPS80  | <i>HDGFRP3</i>    | chr15 | 83820013  | T C   | 560       | 187      | N>S      | missense               |
| LPS80  | <i>IQGAP1</i>     | chr15 | 91026781  | A C   | 3744      | 1248     | L>F      | missense               |
| LPS80  | <i>DNAAF1</i>     | chr16 | 84182654  | C T   | 167       | 56       | T>I      | missense               |
| LPS80  | <i>STARD3</i>     | chr17 | 37815053  | C T   | 572       | 191      | S>L      | missense               |
| LPS80  | <i>COG1</i>       | chr17 | 71193530  | C G   | 908       | 303      | P>R      | missense               |
| LPS80  | <i>TSN</i>        | chr2  | 122522834 | A G   | 578       | 193      | K>R      | missense               |
| LPS80  | <i>KRTAP10-11</i> | chr21 | 46066767  | G T   | 392       | 131      | S>I      | missense               |
| LPS80  | <i>SEMA3G</i>     | chr3  | 52474021  | G A   | 1237      | 413      | L>F      | missense               |
| LPS80  | <i>CDH12</i>      | chr5  | 21752012  | G A   | 2219      | 740      | A>V      | missense               |
| LPS80  | <i>MGAM</i>       | chr7  | 141727465 | G A   | 1151      | 384      | R>H      | missense               |
| LPS80  | <i>PLEC</i>       | chr8  | 144995168 | G C   | 8779      | 2927     | L>V      | missense               |
| LPS80  | <i>ASB9</i>       | chrX  | 15268665  | G A   | 455       | 152      | S>F      | missense               |
| LPS80  | <i>FAM47C</i>     | chrX  | 37027222  | C T   | 739       | 247      | R>C      | missense               |
| LPS80  | <i>FMR1NB</i>     | chrX  | 147084825 | T G   | 382       | 128      | F>V      | missense               |
| LPS80  | <i>NDUFA9</i>     | chr12 | 4778952   | G A   | 769       | 257      | D>N      | missense               |
| LPS80  | <i>COL2A1</i>     | chr12 | 48372514  | C T   | 2554      | 852      | G>S      | missense               |
| LPS80  | <i>MCTS1</i>      | chrX  | 119740017 | G C   | 251       | 84       | R>T      | missense               |
| LPS80  | <i>CYTIP</i>      | chr2  | 158300390 | G A   | 143       | 48       | T>M      | missense               |

|       |                 |       |           |           |           |           |        |                         |
|-------|-----------------|-------|-----------|-----------|-----------|-----------|--------|-------------------------|
| LPS80 | <i>DNAH14</i>   | chr1  | 225452889 | C T       | 7210      | 2404      | P>S    | missense                |
| LPS80 | <i>ZNF280C</i>  | chrX  | 129370191 | C T       | 768       | 256       | M>I    | missense                |
| LPS80 | <i>PPFIA2</i>   | chr12 | 81693145  | C T       | 1360      | 454       | E>K    | missense                |
| LPS80 | <i>XIRP2</i>    | chr2  | 168104657 | A G       | 6089      | 2030      | D>G    | missense                |
| LPS80 | <i>RYR2</i>     | chr1  | 237617829 | C -       | 1431      | 477       | N>fs   | frameshift deletion     |
| LPS80 | <i>SVIL</i>     | chr10 | 29762864  | C T       | 4154      | 1385      | C>Y    | missense                |
| LPS80 | <i>MUC4</i>     | chr3  | 195509353 | G A       | 9098      | 3033      | A>V    | missense                |
| LPS80 | <i>CSMD2</i>    | chr1  | 34003051  | G T       | 9358      | 3120      | Q>K    | missense                |
| LPS80 | <i>MUC4</i>     | chr3  | 195509354 | C T       | 9097      | 3033      | A>T    | missense                |
| LPS81 | <i>MUC4</i>     | chr3  | 195508283 | G A       | 10168     | 3390      | A>T    | missense                |
| LPS81 | <i>MUC4</i>     | chr3  | 195511012 | C G       | 7439      | 2480      | P>R    | missense                |
| LPS81 | <i>MUC4</i>     | chr3  | 195513650 | C G       | 4801      | 1601      | L>V    | missense                |
| LPS81 | <i>THSD7A</i>   | chr7  | 11419307  | G A       | 4540      | 1514      | D>N    | missense                |
| LPS81 | <i>SEMA3A</i>   | chr7  | 83590938  | A G       | 2065      | 689       | K>E    | missense                |
| LPS81 | <i>PLEC</i>     | chr8  | 144991208 | G A       | 12793     | 4265      | A>T    | missense                |
| LPS81 | <i>PLEC</i>     | chr8  | 145008167 | C T       | 1274      | 425       | S>L    | missense                |
| LPS81 | <i>PCDH15</i>   | chr10 | 55582674  | G T       | 4605      | 153       | R>S    | missense                |
| LPS81 | <i>PDE3A</i>    | chr12 | 20783043  | C T       | 776       | 259       | P>L    | missense                |
| LPS81 | <i>STAT6</i>    | chr12 | 57499258  | G A       | 805       | 269       | V>I    | missense                |
| LPS81 | <i>TP53BP1</i>  | chr15 | 43769812  | T G       | 934       | 312       | F>V    | missense                |
| LPS81 | <i>MYH3</i>     | chr17 | 10554922  | G A       | 412       | 138       | E>K    | missense                |
| LPS81 | <i>FLT1</i>     | chr13 | 28979920  | A C       | 1548      | 516       | N>K    | missense                |
| LPS81 | <i>MUC4</i>     | chr3  | 195513650 | G C       | 4801      | 1601      | L>V    | missense                |
| LPS81 | <i>TP53BP1</i>  | chr15 | 43769812  | A C       | 934       | 312       | F>V    | missense                |
| LPS81 | <i>PLEC</i>     | chr8  | 144997673 | C T       | 6382      | 2128      | A>T    | missense                |
| LPS81 | <i>PLEC</i>     | chr8  | 145008167 | G A       | 1220      | 407       | S>L    | missense                |
| LPS81 | <i>PDE3A</i>    | chr12 | 20803518  | A G       | 1943      | 648       | N>S    | missense                |
| LPS82 | <i>DNAH14</i>   | chr1  | 225440018 | C T       | 6746      | 2249      | T>I    | missense                |
| LPS82 | <i>USP34</i>    | chr2  | 61633098  | T A       | 297       | 99        | N>K    | missense                |
| LPS82 | <i>MUC4</i>     | chr3  | 195507876 | C G       | 10575     | 3525      | D>E    | missense                |
| LPS82 | <i>MUC4</i>     | chr3  | 195509401 | T C       | 9050      | 3017      | I>T    | missense                |
| LPS82 | <i>MUC4</i>     | chr3  | 195510821 | T C       | 7630      | 2544      | S>P    | missense                |
| LPS82 | <i>MUC4</i>     | chr3  | 195513755 | A T       | 4696      | 1566      | T>S    | missense                |
| LPS82 | <i>MUC4</i>     | chr3  | 195515383 | T C       | 3068      | 1023      | T>N    | missense                |
| LPS82 | <i>DST</i>      | chr6  | 56482923  | T C       | 5909      | 1970      | F>S    | missense                |
| LPS82 | <i>DOPEY1</i>   | chr6  | 83877848  | G A       | 7360      | 2454      | V>I    | missense                |
| LPS82 | <i>BRAF</i>     | chr7  | 140434542 | G A       | 2156      | 719       | R>H    | missense                |
| LPS82 | <i>DPP6</i>     | chr7  | 154561192 | G A       | 949       | 317       | A>T    | missense                |
| LPS82 | <i>PLEC</i>     | chr8  | 145004447 | A G       | 2489      | 830       | D>G    | missense                |
| LPS82 | <i>MYO3A</i>    | chr10 | 26491987  | C T       | 4681      | 1561      | R>X    | stopgain                |
| LPS82 | <i>SVIL</i>     | chr10 | 29821683  | C T       | 1613      | 538       | S>L    | missense                |
| LPS82 | <i>FAT3</i>     | chr11 | 92086345  | G A       | 1067      | 356       | C>Y    | missense                |
| LPS82 | <i>ADAMTSL3</i> | chr15 | 84488678  | C T       | 479       | 160       | P>L    | missense                |
| LPS82 | <i>ANKS3</i>    | chr16 | 4755206   | A G       | 437       | 146       | Q>R    | missense                |
| LPS82 | <i>OTOP3</i>    | chr17 | 72939759  | A C       | 745       | 249       | N>H    | missense                |
| LPS82 | <i>ST8SIA3</i>  | chr18 | 55024205  | C T       | 364       | 122       | R>W    | missense                |
| LPS82 | <i>E2F1</i>     | chr20 | 32268137  | G T       | 347       | 116       | G>V    | missense                |
| LPS82 | <i>MUC4</i>     | chr3  | 195509989 | T A       | 8462      | 2821      | D>V    | missense                |
| LPS82 | <i>MUC4</i>     | chr3  | 195513304 | TGACAGGAA | 5147_5148 | 1716      | delins | nonframeshift insertion |
| LPS82 | <i>GLI1</i>     | chr12 | 57864118  | G A       | 1211      | 404       | R>H    | missense                |
| LPS82 | <i>SACS</i>     | chr13 | 23929088  | C A       | 1663      | 555       | E>X    | stopgain SNV            |
| LPS82 | <i>E2F1</i>     | chr20 | 32268137  | C A       | 347       | 116       | G>V    | missense                |
| LPS83 | <i>SYT6</i>     | chr1  | 114640467 | G A       | 1142      | 381       | R>H    | missense                |
| LPS83 | <i>FCAMR</i>    | chr1  | 207133867 | C A       | 1354      | 452       | L>I    | missense                |
| LPS83 | <i>HTR1F</i>    | chr3  | 88040035  | G A       | 136       | 46        | A>T    | missense                |
| LPS83 | <i>EGF</i>      | chr4  | 110866425 | G A       | 934       | 312       | E>K    | missense                |
| LPS83 | <i>FER1L6</i>   | chr8  | 125072527 | T G       | 2981      | 994       | V>G    | missense                |
| LPS83 | <i>NEUROD4</i>  | chr12 | 55420891  | A G       | 668       | 223       | H>R    | missense                |
| LPS83 | <i>ADAMTSL3</i> | chr15 | 84651057  | G A       | 2677      | 893       | E>K    | missense                |
| LPS83 | <i>DNAH17</i>   | chr17 | 76451830  | G A       | 10066     | 3356      | V>I    | missense                |
| LPS83 | <i>PCDH15</i>   | chr10 | 55582230  | AGG -     | 5134_5136 | 1712_1712 | del    | nonframeshift deletion  |
| LPS83 | <i>ZNF169</i>   | chr9  | 97062740  | TA        | 900_901   | 300       | R>fs   | frameshift insertion    |
| LPS84 | <i>STAT1</i>    | chr2  | 191848450 | T C       | 1364      | 455       | V>A    | missense                |



|       |               |       |           |     |             |      |      |                      |
|-------|---------------|-------|-----------|-----|-------------|------|------|----------------------|
| LPS84 | <i>MUC4</i>   | chr3  | 195506014 | C T | 12437       | 4146 | P>L  | missense             |
| LPS84 | <i>FRG1</i>   | chr4  | 190873398 | C T | 215         | 72   | A>V  | missense             |
| LPS84 | <i>FRG1</i>   | chr4  | 190873412 | C A | 229         | 77   | L>I  | missense             |
| LPS84 | <i>FRG1</i>   | chr4  | 190876263 | A T | 389         | 130  | D>V  | missense             |
| LPS84 | <i>FRG1</i>   | chr4  | 190878625 | A G | 505         | 169  | S>G  | missense             |
| LPS84 | <i>MGAM</i>   | chr7  | 141803090 | A G | 54347       | 1783 | A>V  | missense             |
| LPS84 | <i>PCDH15</i> | chr10 | 55582636  | A G | 4643        | 1548 | N>S  | missense             |
| LPS84 | <i>OR8H2</i>  | chr11 | 55872943  | T C | 425         | 142  | L>P  | missense             |
| LPS84 | <i>MMAB</i>   | chr12 | 109999612 | T C | 394         | 132  | C>R  | missense             |
| LPS84 | <i>LLGL1</i>  | chr17 | 18133277  | A G | 104         | 35   | N>S  | missense             |
| LPS85 | <i>MUC4</i>   | chr3  | 195509378 | C G | 9073        | 3025 | L>V  | missense             |
| LPS85 | <i>MUC4</i>   | chr3  | 195512515 | C A | 5936        | 1979 | T>K  | missense             |
| LPS85 | <i>MUC4</i>   | chr3  | 195518120 | A C | 331         | 111  | M>L  | missense             |
| LPS85 | <i>DNAH17</i> | chr17 | 76451830  | G A | 10066       | 3356 | V>I  | missense             |
| LPS85 | <i>PARP1</i>  | chr1  | 226578123 | A G | 605         | 202  | V>A  | missense             |
| LPS85 | <i>PTEN</i>   | chr10 | 89711993  | C A | 611         | 204  | P>Q  | missense             |
| LPS85 | <i>PTEN</i>   | chr10 | 89711992  | C - | 610         | 204  | P>fs | frameshift deletion  |
| LPS86 | <i>NF1</i>    | chr17 | 29664385  | G A |             |      |      |                      |
| LPS86 | <i>ANKS3</i>  | chr16 | 4764124   | C A | 316         | 106  | G>X  | stopgain SNV         |
| LPS86 | <i>MUC4</i>   | chr3  | 195509287 | T G | 9164        | 3055 | N>T  | missense             |
| LPS86 | <i>MUC4</i>   | chr3  | 195509401 | A G | 9050        | 3017 | I>T  | missense             |
| LPS86 | <i>CFD</i>    | chr19 | 863213    | C A | 737         | 246  | A>D  | missense             |
| LPS87 | <i>XIRP2</i>  | chr2  | 168115133 | G - | 1411        | 471  | D>fs | frameshift deletion  |
| LPS87 | <i>PCDH15</i> | chr10 | 55782929  | C A | 2036        | 679  | G>V  | missense             |
| LPS87 | <i>NF1</i>    | chr17 | 29490391  | C A | 476         | 159  | T>N  | missense             |
| LPS87 | <i>WDR96</i>  | chr10 | 105893514 | A G | 4460        | 1487 | M>T  | missense             |
| LPS87 | <i>MXRA5</i>  | chrX  | 3235780   | G   | 5942_5943   | 1981 | Q>fs | frameshift insertion |
| LPS88 | <i>DOCK7</i>  | chr1  | 63113391  | T G | 789         | 263  | Q>H  | missense             |
| LPS88 | <i>DOCK4</i>  | chr7  | 111448904 | C A | 3139        | 1047 | E>X  | stopgain SNV         |
| LPS88 | <i>ATR</i>    | chr3  | 142178188 | C A | 7230        | 2410 | M>I  | missense             |
| LPS88 | <i>CGNL1</i>  | chr15 | 57836768  | T G | 3473        | 1158 | L>R  | missense             |
| LPS88 | <i>ATM</i>    | chr11 | 108203547 | T C | 7847        | 2616 | M>T  | missense             |
| LPS88 | <i>POLE</i>   | chr12 | 133201355 | C A | 6789        | 2263 | Q>H  | missense             |
| LPS88 | <i>PLCB4</i>  | chr20 | 9318662   | A T | 173         | 58   | Q>L  | missense             |
| LPS88 | <i>MUC4</i>   | chr3  | 195518120 | T G | 331         | 111  | M>L  | missense             |
| LPS89 | <i>DNAH17</i> | chr17 | 76566356  | C A | 1017        | 339  | Q>H  | missense             |
| LPS89 | <i>FRG1</i>   | chr4  | 190876269 | T C | 395         | 132  | I>T  | missense             |
| LPS89 | <i>DOCK7</i>  | chr1  | 62971414  | C A | 4457        | 1486 | C>F  | missense             |
| LPS89 | <i>DOCK7</i>  | chr1  | 62971415  | A T | 4456        | 1486 | C>S  | missense             |
| LPS89 | <i>DNAH17</i> | chr17 | 76450596  | T   | 10362_10363 | 3454 | N>fs | frameshift insertion |
| LPS89 | <i>MUC12</i>  | chr7  | 100643388 | G A | 9544        | 3182 | A>T  | missense             |
| LPS90 | <i>GLI1</i>   | chr12 | 57865027  | C T | 2120        | 707  | A>V  | missense             |
| LPS90 | <i>FRG1</i>   | chr4  | 190876269 | T C | 395         | 132  | I>T  | missense             |

## LPS cell lines

| Sample ID | Gene Symbol    | Chromosome | Genomic position | Nucleotide change (reference variant) | cDNA position | Amino acid position | Amino acid change | Mutation type |
|-----------|----------------|------------|------------------|---------------------------------------|---------------|---------------------|-------------------|---------------|
| LPS141    | <i>MUC4</i>    | chr3       | 195515510        | A C                                   | 2941          | 981                 | Y>D               | missense      |
| LPS141    | <i>PTEN</i>    | chr10      | 89720683         | C G                                   | 834           | 278                 | F>L               | missense      |
| LPS141    | <i>HEPHL1</i>  | chr11      | 93806252         | C T                                   | 1294          | 432                 | R>W               | missense      |
| LPS141    | <i>RB1</i>     | chr13      | 49050886         | G A                                   | 2570          | 857                 | R>H               | missense      |
| LPS141    | <i>TP53BP1</i> | chr15      | 43748890         | C T                                   | 1916          | 639                 | R>Q               | missense      |
| LPS141    | <i>DNAH17</i>  | chr17      | 76491162         | A C                                   | 5921          | 1974                | V>G               | missense      |
| LP6       | <i>FANCD2</i>  | chr3       | 10094159         | A G                                   | 1634          | 545                 | N>S               | missense      |
| LP6       | <i>FRG1</i>    | chr4       | 190876269        | T C                                   | 395           | 132                 | I>T               | missense      |
| LP6       | <i>FRG1</i>    | chr4       | 190883030        | G T                                   | 683           | 228                 | S>I               | missense      |
| LP6       | <i>PLEC</i>    | chr8       | 144993062        | C T                                   | 10939         | 3647                | V>M               | missense      |

|       |                    |       |           |     |       |      |     |          |
|-------|--------------------|-------|-----------|-----|-------|------|-----|----------|
| LP6   | <i>OR8H2</i>       | chr11 | 55872943  | T C | 425   | 142  | L>P | missense |
| LP6   | <i>AGAP2</i>       | chr12 | 58120879  | G T | 2146  | 716  | L>M | missense |
| LP6   | <i>HCAR2</i>       | chr12 | 123187079 | C T | 752   | 251  | R>Q | missense |
| LP6   | <i>SACS</i>        | chr13 | 23910328  | A C | 7687  | 2563 | F>V | missense |
| LP6   | <i>ROBO1</i>       | chr3  | 78676694  | C T | 3352  | 1118 | V>M | missense |
| LP6   | <i>WFS1</i>        | chr4  | 6303405   | C T | 1883  | 628  | T>M | missense |
| LP6   | <i>AGAP2</i>       | chr12 | 58127878  | G A | 1480  | 494  | H>Y | missense |
| LP6   | <i>OR5M3</i>       | chr11 | 56237609  | A G | 365   | 122  | M>T | missense |
| SW872 | <i>PPARG</i>       | chr3  | 12458293  | G A | 826   | 276  | E>K | missense |
| SW872 | <i>ATR</i>         | chr3  | 142178118 | G A | 7300  | 2434 | P>S | missense |
| SW872 | <i>EGF</i>         | chr4  | 110895876 | G A | 1616  | 539  | R>K | missense |
| SW872 | <i>DST</i>         | chr6  | 56376091  | C T | 10815 | 3605 | E>D | missense |
| SW872 | <i>THSD7A</i>      | chr7  | 11871406  | G C | 167   | 56   | P>R | missense |
| SW872 | <i>MUC12</i>       | chr7  | 100634887 | G A | 1043  | 348  | R>H | missense |
| SW872 | <i>BRAF</i>        | chr7  | 140453136 | A T | 1799  | 600  | V>E | missense |
| SW872 | <i>MGAM</i>        | chr7  | 141708471 | G A | 293   | 98   | R>Q | missense |
| SW872 | <i>CDKN2A</i>      | chr9  | 21971120  | G A | 238   | 80   | R>X | stopgain |
| SW872 | <i>CDKN2A</i>      | chr9  | 21971121  | G A | 280   | 94   | P>S | missense |
| SW872 | <i>FAT3</i>        | chr11 | 92534809  | C T | 8630  | 2877 | T>I | missense |
| SW872 | <i>FAT3</i>        | chr11 | 92577352  | G A | 10819 | 3607 | A>T | missense |
| SW872 | <i>TP53</i>        | chr17 | 7577529   | A T | 356   | 119  | I>N | missense |
| SW872 | <i>DNAH17</i>      | chr17 | 76482548  | C T | 6859  | 2287 | E>K | missense |
| SW872 | <i>ZNF135</i>      | chr19 | 58578642  | C T | 826   | 276  | H>Y | missense |
| SW872 | <i>RNF32</i>       | chr7  | 156468392 | C G | 687   | 229  | F>L | missense |
| SW872 | <i>PLEC</i>        | chr8  | 144991082 | C T | 12865 | 4289 | V>M | missense |
| SW872 | <i>HEG1</i>        | chr3  | 124739948 | T C | 940   | 314  | N>D | missense |
| SW872 | <i>SEMA3A</i>      | chr7  | 83634712  | C T | 1303  | 435  | V>I | missense |
| SW872 | <i>MOGAT3</i>      | chr7  | 100843532 | C T | 271   | 91   | D>N | missense |
| SW872 | <i>LIPE</i>        | chr19 | 42930734  | G T | 568   | 190  | P>T | missense |
| SW872 | <i>ZNF611</i>      | chr19 | 53209906  | C G | 402   | 134  | K>N | missense |
| T778  | <i>DNAH14</i>      | chr1  | 225270424 | A T | 3310  | 1104 | N>Y | missense |
| T778  | <i>XIRP2</i>       | chr2  | 168099316 | T C | 1414  | 472  | S>A | missense |
| T778  | <i>MUC4</i>        | chr3  | 195506674 | A G | 11777 | 3926 | V>A | missense |
| T778  | <i>EGF</i>         | chr4  | 110885680 | C G | 1436  | 479  | P>H | missense |
| T778  | <i>MAGEB6</i>      | chrX  | 26212695  | G T | 732   | 244  | L>F | missense |
| T778  | <i>ERBB2</i>       | chr17 | 37864647  | G A | 209   | 70   | R>Q | missense |
| T778  | <i>CHEK2</i>       | chr22 | 29130456  | G C | 254   | 85   | P>R | missense |
| T1000 | <i>DNAH14</i>      | chr1  | 225492710 | C T | 8645  | 2882 | T>I | missense |
| T1000 | <i>ROBO1</i>       | chr3  | 78710202  | C T | 2298  | 766  | K>N | missense |
| T1000 | <i>MUC4</i>        | chr3  | 195512412 | C A | 6039  | 2013 | Q>H | missense |
| T1000 | <i>APC</i>         | chr5  | 112174456 | A T | 3111  | 1037 | I>M | missense |
| T1000 | <i>MUC12</i>       | chr7  | 100635210 | T C | 1366  | 456  | S>P | missense |
| T1000 | <i>MUC12</i>       | chr7  | 100648360 | C A | 14516 | 4839 | A>D | missense |
| T1000 | <i>DOCK4;DOCK4</i> | chr7  | 111580166 | T C | 976   | 326  | M>V | missense |
| T1000 | <i>PLEC</i>        | chr8  | 145005769 | C T | 2249  | 750  | R>H | missense |
| T1000 | <i>MXRA5</i>       | chrX  | 3248104   | C J | 664   | 222  | D>N | missense |
| T1000 | <i>PCDH15</i>      | chr10 | 55700673  | G T | 2972  | 991  | A>V | missense |
| T1000 | <i>ERBB3</i>       | chr12 | 56493677  | A G | 2993  | 998  | K>T | missense |
| T1000 | <i>STAT6</i>       | chr12 | 57490504  | C T | 2395  | 799  | E>K | missense |
| SA4   | <i>FCAMR</i>       | chr1  | 207135723 | G A | 487   | 163  | H>Y | missense |
| SA4   | <i>DNAH14</i>      | chr1  | 225267125 | A T | 2641  | 881  | S>C | missense |
| SA4   | <i>MUC4</i>        | chr3  | 195506674 | A G | 11777 | 3926 | V>A | missense |
| SA4   | <i>MUC4</i>        | chr3  | 195506692 | C G | 11759 | 3920 | R>P | missense |
| SA4   | <i>MUC4</i>        | chr3  | 195506725 | T A | 11726 | 3909 | D>G | missense |
| SA4   | <i>SPOCK3</i>      | chr4  | 167656203 | C T | 904   | 302  | D>N | missense |
| SA4   | <i>DST;DST</i>     | chr6  | 56350110  | C A | 13338 | 4446 | K>N | missense |
| SA4   | <i>BRAF</i>        | chr7  | 140453136 | A T | 1799  | 600  | V>E | missense |
| SA4   | <i>MXRA5</i>       | chrX  | 3229524   | C T | 6720  | 2240 | M>I | missense |
| SA4   | <i>MYO3A</i>       | chr10 | 26436473  | C T | 2620  | 874  | P>S | missense |
| SA4   | <i>STAT6</i>       | chr12 | 57500533  | C T | 421   | 141  | V>I | missense |
| SA4   | <i>FLT1</i>        | chr13 | 29007999  | G A | 770   | 257  | P>L | missense |
| SA4   | <i>DNAAF1</i>      | chr16 | 84203788  | C A | 1354  | 452  | P>T | missense |
| LP1   | <i>CSMD2</i>       | chr1  | 34066566  | C T | 6761  | 2254 | R>Q | missense |
| LP1   | <i>MUC4</i>        | chr3  | 195506911 | G C | 11540 | 3847 | S>F | missense |
| LP1   | <i>MUC12</i>       | chr7  | 100636722 | G C | 2878  | 960  | V>L | missense |
| LP1   | <i>MGAM</i>        | chr7  | 141763311 | C A | 4270  | 1424 | P>T | missense |

|         |                |       |           |     |       |      |     |          |
|---------|----------------|-------|-----------|-----|-------|------|-----|----------|
| LP1     | <i>PTEN</i>    | chr10 | 89692790  | G A | 274   | 92   | D>N | missense |
| LP1     | <i>OR5M3</i>   | chr11 | 56237502  | T A | 472   | 158  | T>S | missense |
| LP1     | <i>DLG2</i>    | chr11 | 84822734  | G C | 328   | 110  | P>A | missense |
| LP1     | <i>ROBO1</i>   | chr3  | 78655944  | T G | 4683  | 1561 | K>N | missense |
| LP2     | <i>CSMD2</i>   | chr1  | 33985463  | G A | 10253 | 3418 | P>L | missense |
| LP2     | <i>CSMD2</i>   | chr1  | 34066566  | C T | 6761  | 2254 | R>Q | missense |
| LP2     | <i>MUC12</i>   | chr7  | 100636722 | G C | 2878  | 960  | V>L | missense |
| LP2     | <i>MGAM</i>    | chr7  | 141763311 | C A | 4270  | 1424 | P>T | missense |
| LP2     | <i>OR6B1</i>   | chr7  | 143701522 | G A | 433   | 145  | A>T | missense |
| LP2     | <i>OR5M3</i>   | chr11 | 56237502  | T A | 472   | 158  | T>S | missense |
| LP2     | <i>DLG2</i>    | chr11 | 84822734  | G C | 328   | 110  | P>A | missense |
| LP3     | <i>ROBO1</i>   | chr3  | 78655944  | T G | 4683  | 1561 | K>N | missense |
| LP3     | <i>CSMD2</i>   | chr1  | 33985463  | G A | 10253 | 3418 | P>L | missense |
| LP3     | <i>CSMD2</i>   | chr1  | 34066566  | C T | 6761  | 2254 | R>Q | missense |
| LP3     | <i>MUC4</i>    | chr3  | 195506674 | A G | 11777 | 3926 | V>A | missense |
| LP3     | <i>MUC4</i>    | chr3  | 195506692 | C G | 11759 | 3920 | R>P | missense |
| LP3     | <i>MUC4</i>    | chr3  | 195506911 | G C | 11540 | 3847 | S>F | missense |
| LP3     | <i>MUC12</i>   | chr7  | 100636722 | G C | 2878  | 960  | V>L | missense |
| LP3     | <i>MGAM</i>    | chr7  | 141763311 | C A | 4270  | 1424 | P>T | missense |
| LP3     | <i>PTEN</i>    | chr10 | 89692790  | G A | 274   | 92   | D>N | missense |
| LP3     | <i>OR5M3</i>   | chr11 | 56237502  | T A | 472   | 158  | T>S | missense |
| LP3     | <i>DLG2</i>    | chr11 | 84822734  | G C | 328   | 110  | P>A | missense |
| MLS402  | <i>HEG1</i>    | chr3  | 124732563 | C A | 1860  | 620  | Q>H | missense |
| MLS402  | <i>MUC12</i>   | chr7  | 100634386 | C T | 542   | 181  | P>L | missense |
| MLS402  | <i>INTS6</i>   | chr13 | 51943320  | A G | 2231  | 744  | L>S | missense |
| FUDDLS1 | <i>ERBB4</i>   | chr2  | 212288969 | G A | 2777  | 926  | T>M | missense |
| FUDDLS1 | <i>WFS1</i>    | chr4  | 6303731   | G A | 2209  | 737  | E>K | missense |
| FUDDLS1 | <i>MDC1</i>    | chr6  | 30673725  | G A | 3235  | 1079 | R>S | missense |
| FUDDLS1 | <i>DST</i>     | chr6  | 56347491  | G C | 13523 | 4508 | A>G | missense |
| FUDDLS1 | <i>CSMD3</i>   | chr8  | 113275939 | T G | 9284  | 3095 | E>A | missense |
| FUDDLS1 | <i>MXRA5</i>   | chrX  | 3229104   | C T | 7140  | 2380 | W>X | stopgain |
| FUDDLS1 | <i>GLI1</i>    | chr12 | 57859693  | A G | 747   | 249  | Q>H | missense |
| GOT3    | <i>MDC1</i>    | chr6  | 30672567  | C G | 4393  | 1465 | V>L | missense |
| GOT3    | <i>PTCHD4</i>  | chr6  | 47976616  | T C | 661   | 221  | S>G | missense |
| GOT3    | <i>MUC12</i>   | chr7  | 100636543 | C G | 2699  | 900  | T>S | missense |
| GOT3    | <i>PLEC</i>    | chr8  | 144990784 | G A | 13217 | 4406 | T>M | missense |
| GOT3    | <i>PLEC</i>    | chr8  | 145009036 | C T | 899   | 300  | R>Q | missense |
| GOT3    | <i>SACS</i>    | chr13 | 23929138  | G A | 1613  | 538  | A>V | missense |
| GOT3    | <i>BTBD7</i>   | chr14 | 93760826  | C G | 540   | 180  | E>D | missense |
| GOT3    | <i>DNAH17</i>  | chr17 | 76490147  | C T | 6379  | 2127 | V>I | missense |
| LiSa-2  | <i>PADI2</i>   | chr1  | 17413152  | C T | 698   | 233  | R>L | missense |
| LiSa-2  | <i>ADAMTS4</i> | chr1  | 161160941 | G C | 2501  | 834  | A>G | missense |
| LiSa-2  | <i>MUC4</i>    | chr3  | 195513215 | G A | 5236  | 1746 | L>V | missense |
| LiSa-2  | <i>MUC4</i>    | chr3  | 195518002 | T C | 449   | 150  | N>S | missense |
| LiSa-2  | <i>DOPEY1</i>  | chr6  | 83841919  | C T | 2614  | 872  | Q>X | stopgain |
| LiSa-2  | <i>MUC12</i>   | chr7  | 100635210 | T C | 1366  | 456  | S>P | missense |
| LiSa-2  | <i>TP53</i>    | chr17 | 7573984   | A G | 926   | 309  | L>S | missense |

|                                           |
|-------------------------------------------|
| True call validated by Sanger Sequencing  |
| False call validated by Sanger Sequencing |
| Sanger Sequencing not done                |

**Supplementary Table S9: List of significantly mutated genes identified by MuSiC analysis**

| Gene            | Indels | SNVs | Total Muts | Covd Bps | Muts pMbp | P-value FCPT | P-value LRT | P-value CT  | FDR FCPT    | FDR LRT     | FDR CT      |
|-----------------|--------|------|------------|----------|-----------|--------------|-------------|-------------|-------------|-------------|-------------|
| <i>MXRA5</i>    | 0      | 26   | 26         | 756562   | 34.37     | 1.03E-12     | 1.47E-14    | 6.66E-17    | 2.33E-10    | 3.31E-12    | 1.51E-14    |
| <i>ZNF611</i>   | 0      | 14   | 14         | 390420   | 35.86     | 2.33E-07     | 1.35E-08    | 1.97E-10    | 2.64E-05    | 1.02E-06    | 2.22E-08    |
| <i>PLEC</i>     | 0      | 26   | 26         | 1362365  | 19.08     | 5.81E-06     | 5.01E-09    | 2.44E-09    | 0.000437856 | 5.66E-07    | 1.84E-07    |
| <i>XIRP2</i>    | 3      | 15   | 18         | 1166449  | 15.43     | 1.95E-05     | 1.06E-05    | 8.09E-08    | 0.001102237 | 0.000399319 | 4.57E-06    |
| <i>STARD3</i>   | 2      | 8    | 10         | 476260   | 21        | 4.94E-05     | 2.24E-07    | 1.62E-07    | 0.00223313  | 1.27E-05    | 6.12E-06    |
| <i>NF1</i>      | 6      | 11   | 17         | 1746222  | 9.74      | 6.68E-05     | 8.30E-06    | 1.49E-07    | 0.002516164 | 0.000375227 | 6.12E-06    |
| <i>FAT3</i>     | 2      | 19   | 21         | 1703804  | 12.33     | 0.000573899  | 0.00295259  | 7.68E-06    | 0.018528728 | 0.035120278 | 0.00024793  |
| <i>SPHKAP</i>   | 0      | 11   | 11         | 653608   | 16.83     | 0.005531814  | 0.001146382 | 0.000129552 | 0.156273757 | 0.018505873 | 0.003659843 |
| <i>MDC1</i>     | 0      | 11   | 11         | 759489   | 14.48     | 0.009455728  | 3.85E-05    | 0.000215403 | 0.234363448 | 0.001086464 | 0.005288276 |
| <i>HEPPL1</i>   | 0      | 9    | 9          | 602151   | 14.95     | 0.011534201  | 5.60E-05    | 0.000233995 | 0.236975408 | 0.001405378 | 0.005288276 |
| <i>MGAM</i>     | 0      | 17   | 17         | 1600972  | 10.62     | 0.010370064  | 0.002950477 | 0.000364352 | 0.234363448 | 0.035120278 | 0.007485777 |
| <i>TP53</i>     | 1      | 6    | 7          | 344578   | 20.31     | 0.027307104  | 0.006070038 | 0.000527231 | 0.474723496 | 0.0552944   | 0.009165717 |
| <i>PCDH15</i>   | 2      | 11   | 13         | 1530462  | 8.49      | 0.018530316  | 0.010433525 | 0.000522667 | 0.348987615 | 0.073686768 | 0.009165717 |
| <i>NEUROD4</i>  | 0      | 4    | 4          | 118515   | 33.75     | 0.079929696  | 0.00016416  | 0.000758615 | 1           | 0.003372739 | 0.012246211 |
| <i>UBQLNL</i>   | 0      | 3    | 3          | 122919   | 24.41     | 0.145750004  | 3.12E-05    | 0.001685372 | 1           | 0.001008792 | 0.025392937 |
| <i>ZNF135</i>   | 0      | 8    | 8          | 498534   | 16.05     | 0.05374323   | 0.011672432 | 0.002005476 | 0.867569285 | 0.077587341 | 0.028327349 |
| <i>DNAAF1</i>   | 0      | 6    | 6          | 336255   | 17.84     | 0.079931809  | 0.000108421 | 0.002194226 | 1           | 0.002450314 | 0.029170294 |
| <i>TTI1</i>     | 0      | 6    | 6          | 371274   | 16.16     | 0.108401672  | 0.001972784 | 0.003418823 | 1           | 0.027865571 | 0.042925227 |
| <i>MIA2</i>     | 0      | 4    | 4          | 251693   | 15.89     | 0.228335575  | 0.007010551 | 0.005995344 | 1           | 0.060937869 | 0.071313035 |
| <i>PLBD1</i>    | 1      | 3    | 4          | 265606   | 15.06     | 0.255677525  | 0.007530141 | 0.008645107 | 1           | 0.061138611 | 0.097689705 |
| <i>ABCC3</i>    | 0      | 10   | 10         | 853063   | 11.72     | 0.121849182  | 0.048782138 | 0.01047964  | 1           | 0.194122872 | 0.112780892 |
| <i>CSMD3</i>    | 0      | 9    | 9          | 1854505  | 4.85      | 0.273033218  | 0.000568406 | 0.012632558 | 1           | 0.009881527 | 0.118673066 |
| <i>ZNF280C</i>  | 0      | 4    | 4          | 371894   | 10.76     | 0.303102928  | 0.001596326 | 0.013127552 | 1           | 0.024051316 | 0.118673066 |
| <i>ADAMTSL3</i> | 0      | 7    | 7          | 767144   | 9.12      | 0.184079945  | 0.01286249  | 0.012660999 | 1           | 0.08278245  | 0.118673066 |
| <i>FRG1</i>     | 0      | 3    | 3          | 211978   | 14.15     | 0.41294549   | 0.003708376 | 0.015272651 | 1           | 0.039909188 | 0.127837744 |
| <i>CHEK2</i>    | 0      | 5    | 5          | 324864   | 15.39     | 0.279267999  | 0.010291809 | 0.014872484 | 1           | 0.073686768 | 0.127837744 |
| <i>SACS</i>     | 0      | 8    | 8          | 1317756  | 6.07      | 0.23812534   | 0.010978076 | 0.017553228 | 1           | 0.075183185 | 0.141679626 |

## Supplementary Table S10: KEGG pathway analysis

| Genes altered in patients                                                                                                                                                                                            | KEGG pathway               | KEGG ID  | P value    | FDR         | Drugs                                                                                                                                                                                                       |
|----------------------------------------------------------------------------------------------------------------------------------------------------------------------------------------------------------------------|----------------------------|----------|------------|-------------|-------------------------------------------------------------------------------------------------------------------------------------------------------------------------------------------------------------|
| <i>EGF</i> (5); <i>EGFR</i> (3); <i>TP53</i> (6); <i>NF1</i> (14); <i>MAPK7</i> (2); <i>AKT1</i> (1); <i>CACNAID</i> (3); <i>BRAF</i> (2)                                                                            | MAPK signaling pathway     | hsa04010 | 1.7852E-14 | 2.22E-14    | Cetuximab, Dasatinib , Erlotinib hydrochloride, Lapatinib tosilate hydrate, Golimumab, Pazopanib hydrochloride, Sorafenib tosilate, Sunitinib malate, Vandetanib, Motesanib, Afatinib maleate and more      |
| <i>PIK3CA</i> (5); <i>TP53</i> (6); <i>PI3KCD</i> (2); <i>ATM</i> (6); <i>AKT1</i> (1); <i>PIK3CG</i> (2);                                                                                                           | Apoptosis                  | hsa04210 | 3.6097E-13 | 5.15E-13    | Etanercept, Adalimumab, Infliximab, Anakinra, Certolizumab pegol, Daniplestim, Leridistim, Rilonecept                                                                                                       |
| <i>STAT6</i> (6); <i>PI3KCA</i> (5); <i>STAT5A</i> (4); <i>PI3KCD</i> (2); <i>AKT1</i> (1); <i>STAT1</i> (2); <i>PI3KCG</i> (2);                                                                                     | Jak-STAT signaling pathway | hsa04630 | 2.4921E-11 | 4.49E-11    | Thiamazole, Propylthiouracil, Interferons, Tocilizumab, Somatropin, Basiliximab, Epoetins, Filgrastim, Daclizumab, Daniplestim, Darbepoetin alfa, Lestaurtinib, Ruxolitinib phosphate, Tofacitinib and more |
| <i>ERBB2</i> (3); <i>ERBB3</i> (2); <i>ERBB4</i> (1); <i>PIK3CA</i> (5); <i>PIK3CD</i> (2); <i>PIK3CG</i> (2); <i>AKT1</i> (1); <i>STAT5A</i> (4); <i>MTOR</i> (1); <i>BRAF</i> (2); <i>EGFR</i> (3); <i>EGF</i> (5) | ErbB signaling pathway     | hsa04012 | 3.1497E-11 | 3.96E-11    | Gefitinib, Bosutinib, Trastuzumab, Cetuximab, Dasatinib, Erlotinib hydrochloride, Lapatinib tosilate hydrate, Mubritinib, Panitumumab, Pelitinib, Pertuzumab, Temsirolimus and more                         |
| <i>BRCA1</i> (3); <i>BRCA2</i> (4); <i>FANCA</i> (7); <i>ERCC1</i> (1); <i>ERCC4</i> (3); <i>FANCB</i> (1); <i>FANCD2</i> (3); <i>TELO2</i> (5)                                                                      | Fanconi anemia pathway     | hsa03460 | 1.8189E-07 | 2.24E-07    |                                                                                                                                                                                                             |
| <i>APC</i> (6); <i>PLCB4</i> (2); <i>PLCB3</i> (2); <i>TP53</i> (6); <i>PPP2R1B</i> (4)                                                                                                                              | Wnt signaling pathway      | hsa04310 | 4.0793E-07 | 6.01E-07    |                                                                                                                                                                                                             |
| <i>CHEK2</i> (5); <i>ATM</i> (6); <i>TP53</i> (6); <i>PTEN</i> (3)                                                                                                                                                   | p53 signaling pathway      | hsa04115 | 0.00012323 | 0.000167154 | Hydroxycarbamide                                                                                                                                                                                            |
| <i>POLE</i> (7); <i>XRCC1</i> (2); <i>PARP1</i> (4)                                                                                                                                                                  | Base excision repair       | hsa03410 | 0.00016032 | 0.000192665 | Iniparib                                                                                                                                                                                                    |
| <i>SEMA3A</i> (3); <i>ROBO1</i> (6); <i>SEMA3G</i> (5);                                                                                                                                                              | Axon guidance              | hsa04360 | 0.00024075 | 0.000374804 | Valategrast hydrochloride                                                                                                                                                                                   |
| <i>CHEK2</i> (5); <i>TP53</i> (6); <i>ATM</i> (6); <i>MCM6</i> (1); <i>E2F1</i> (1)                                                                                                                                  | Cell cycle                 | hsa04110 | 0.00044405 | 0.00059063  | Nilotinib hydrochloride hydrate, Nilotinib                                                                                                                                                                  |
| <i>ERCC4</i> (3); <i>POLE</i> (7); <i>ERCC1</i> (1)                                                                                                                                                                  | Nucleotide excision repair | hsa03420 | 0.003679   | 0.004460381 |                                                                                                                                                                                                             |
| <i>POLE</i> (7); <i>MCM6</i> (1)                                                                                                                                                                                     | DNA replication            | hsa03030 | 0.0094512  | 0.01106679  |                                                                                                                                                                                                             |

### Supplementary Table S11: List of primer sequences

| <b>q-RT-PCR primers</b>      | <b>Sequence 5' to 3'</b>                                    |
|------------------------------|-------------------------------------------------------------|
| hCPM-Forward                 | GTCCTCTCTGCAAACCTCCAT                                       |
| hCPM-Reverse                 | CCCAGTTGCTTGAACACCAT                                        |
| hGAPDH-Forward               | CTTCAACAGCGACACCCACT                                        |
| hGAPDH-Reverse               | GTGGTCCAGGGGTCTTACTC                                        |
| hLPL-Forward                 | CCGAGAGTGAGAACATCCCATTCA                                    |
| hLPL-Reverse                 | CCTTTCTGCAAATGAGACACTTTCTC                                  |
| hNF1-Forward                 | TGTCAGTGCATAACCTCTTGC                                       |
| hNF1-Reverse                 | AGTGCCATCACTCTTTTCTGAAG                                     |
| <b>shRNA cloning primers</b> | <b>Sequence 5' to 3'</b>                                    |
| hCPM shRNA1                  | CCGGCCAGTATGACTTGAATCGAAACTCGAGTTTCGATTCAAGTCATACTGGTTTTTG  |
| hCPM shRNA2                  | CCGGCCAACAAATATGGAGAGTATTCTCGAGAATACTCTCCATATTTGTTGGTTTTTG  |
| hCPM shRNA3                  | CCGGCCCTGAAATCACAAATCTGATCTCGAGATCAGATTTGTGATTCAGGGTTTTTG   |
| hCPM shRNA4                  | CCGGCCAGAACTTCAGTGCTCTTAACTCGAGTTAAGAGCACTGAAGTTCTGGTTTTTG  |
| hNontarget shRNA             | CCGGGCGCGATAGCGCTAATAATTTCTCGAGAAATTATTAGCGCTATCGCGCTTTTTTG |
| hNF1 shRNA1                  | CCGGTGCGCAGTTAGCAGTTATAAACTCGAGTTTATAACTGCTAACTGCGCATTTTTG  |
| hNF1 shRNA2                  | CCGGTTTAGATAGTCTCCGTATATTCTCGAGAATATACGGAGACTATCTAAATTTTTG  |

**Supplementary Table S12: List of antibodies used in the study**

| <b>Antibody</b>                | <b>Catalog No.</b> | <b>Company</b>  |
|--------------------------------|--------------------|-----------------|
| CPM                            | HPA002657          | Sigma           |
| CPM                            | ab49278            | Abcam           |
| Phospho-EGF Receptor (Tyr1068) | 2234               | Cell Signalling |
| EGF Receptor Antibody          | 2232               | Cell Signalling |
| Phospho-ERK (E-4)              | sc-7383            | Santa Cruz      |
| ERK 1/2 (MK1)                  | sc-135900          | Santa Cruz      |
| Phospho-Akt (Thr308) (L32A4)   | 5106               | Cell Signalling |
| Akt (pan) (C67E7)              | 4691               | Cell Signalling |
| p21 Waf1/Cip1 (12D1)           | 2947               | Cell Signalling |
| Neurofibromin (D)              | sc-67              | Santa Cruz      |
| GAPDH (14C10)                  | 2118               | Cell Signalling |
| $\beta$ -Actin                 | A5316              | Sigma           |
